# Supplementary material for: Dominant substitutions underlying the antigenic evolution of H5 influenza virus
Source: Research Square preprint supplement (doi:10.21203/rs.3.rs-6040842/v1), 2025-02-26
Supplement: Supplementary file 1 [file 01a821aa0b0e797d75f5f3fb.xlsx]

## Sheet: Sheet1
Isolate Name	Abbreviation	Clade	Subtype	Note
A/Viet_Nam/1203/2004	VI04	1	H5N1	WHO-recommended vaccine strain
A/goose/Guiyang/337/2006	GY06	4	H5N1	WHO-recommended vaccine strain
A/Cambodia/R0405050/2007	CA07	1.1	H5N1	WHO-recommended vaccine strain
A/chicken/vietnam/NCVD-016/2008-PR8-IDCDC-RG12	VI08	7.1	H5N1	WHO-recommended vaccine strain
A/Cambodia/X0810301/2013	CA13	1.1.2	H5N1	WHO-recommended vaccine strain
A/duck/Hunan/795/2002	HN02	2.1.1	H5N1	WHO-recommended vaccine strain
A/Indonesia/5/2005	IN05	2.1.3.2	H5N1	WHO-recommended vaccine strain
A/Indonesia/NIHRD11771/2011	IN11	2.1.3.2a	H5N1	WHO-recommended vaccine strain
A/chicken/India/NIV33487/06	IN06	2.2	H5N1	WHO-recommended vaccine strain
A/Egypt/3300-NAMRU3/2008	EG08	2.2.1.1	H5N1	WHO-recommended vaccine strain
A/Egypt/N03072/2010	EG10	2.2.1	H5N1	WHO-recommended vaccine strain
A/Egypt/N04915/2014	EG14	2.2.1.2	H5N1	WHO-recommended vaccine strain
A/common_magpie/Hong_Kong/5052/2007	HK07	2.3.2.1	H5N1	WHO-recommended vaccine strain
A/barn_swallow/Hong_Kong/1161/2010	HK10	2.3.2.1b	H5N1	WHO-recommended vaccine strain
A/duck/Vietnam/NCVD-1584/2012	VI12	2.3.2.1c	H5N1	WHO-recommended vaccine strain
A/duck/Bangladesh/17D1012/2018	BA18	2.3.2.1a	H5N1	WHO-recommended vaccine strain
A/chicken/Hong_Kong/AP156/2008	HK08	2.3.4	H5N1	WHO-recommended vaccine strain
A/Sichuan/26221/2014	SI14	2.3.4.4b	H5N6	WHO-recommended vaccine strain
A/Astrakhan/3212/2020	AS20	2.3.4.4b	H5N8	WHO-recommended vaccine strain
A/American_Wigeon/South_Carolina/USDA-000345-001/2021	CR21	2.3.4.4b	H5N1	WHO-recommended vaccine strain
A/Taxes/37/2024	TE24	2.3.4.4b	H5N1	Bovine-origin human isolate strain
A/gyrfalcon/Washington/41088-6/2014	WA14	2.3.4.4c	H5N8	WHO-recommended vaccine strain
A/duck/Hyogo/1/2016	HY16	2.3.4.4e	H5N6	WHO-recommended vaccine strain
A/chicken/Vietnam/Raho4-Cd-20-421/2020	VI20	2.3.4.4g	H5N6	WHO-recommended vaccine strain
A/Guangdong/18SF020/2018	GD18	2.3.4.4h	H5N6	WHO-recommended vaccine strain
