# Supplementary material for: Dominant substitutions underlying the antigenic evolution of H5 influenza virus
Source: Research Square preprint supplement (doi:10.21203/rs.3.rs-6040842/v1), 2025-02-26
Supplement: Supplementary file 2 [file 02256ce9e8e5a8d34c070ce8.xlsx]

## Sheet: antigenic_distance_matrix
Strain_Name	GY06|4	VI08|7.1	VI04|1	CA07|1.1	CA13|1.1.1	HN02|2.1	IN05|2.1.3.2	IN11|2.1.3.2a	IN06|2.2	EG10|2.2.1	EG08|2.2.1.1	EG14|2.2.1.2	HK07|2.3.2.1	HK10|2.3.2.1b	VI12|2.3.2.1c	HK08|2.3.4	BA18|2.3.2.1a	CR21|2.3.4.4b	HY16|2.3.4.4e	SI14|2.3.4.4b	GD18|2.3.4.4h	VI20|2.3.4.4g	WA14|2.3.4.4c	AS20|2.3.4.4b	TE24|2.3.4.4b	EPI_ISL_164600	EPI_ISL_98738	EPI_ISL_4046	EPI_ISL_79681	EPI_ISL_17024123	EPI_ISL_98856	EPI_ISL_5773	EPI_ISL_343411	EPI_ISL_343382	EPI_ISL_5769	EPI_ISL_11384	EPI_ISL_11872	EPI_ISL_89366	EPI_ISL_31745	EPI_ISL_262572	EPI_ISL_31736	EPI_ISL_18823967	EPI_ISL_268	EPI_ISL_166660	EPI_ISL_67998	EPI_ISL_891209	EPI_ISL_173687	EPI_ISL_10049	EPI_ISL_281682
GY06|4	0	0.45047817808491464	0.22180057405528508	0.8207179804477445	0.22011742853304428	0.549892950443045	0.4018845931231605	0.6063632364075422	0.9733063952623171	0.8994801080800432	0.44034776235302586	1.165098149977453	0.673241752837244	1.0967721734642675	0.7875998197885323	0.44543317392251536	0.7558967442950856	1.412560793983047	1.5034209033236947	1.4598571852466626	1.0423242515590432	1.5596601165987483	1.4047128106706699	1.612869869835992	1.5384722057195404	0.4130572973132204	0.20956955079495676	0.2642447595762947	0.7088466753462326	0.4819916735889166	0.7430412698417289	0.5094394194414755	0.5014461746007575	0.659712352344515	0.3986568696497992	0.8558114820225862	0.6770990154325052	1.0099765111493917	0.8043814613546978	1.1354705969783707	0.9542882907383603	0.7134224579319599	0.4125702358480815	0.3903445069528597	0.9053004474719051	0.8830799488582801	0.3769546384528495	0.1815077996568043	0.18834239624529914
VI08|7.1	0.45047817808491464	0	0.9090416488982591	1.2833480835854374	0.3968990086995301	0.8790518006007111	0.6808930610910564	0.4420221121795723	1.230068647923048	1.4488036182339177	0.35317138323087605	1.1889668039595873	0.7977936648669917	1.3939796450659792	1.209708206897696	0.27683703101333723	0.6408505242610234	1.463695330911512	1.4294828910800816	0.9720201682463747	0.8759490745856571	1.2836306600163345	1.2930388215661461	1.5527788828861737	1.0169004145119707	0.5835805882862307	0.5768252047448792	0.6890891262642622	0.8380742111614746	0.6496328405843899	0.42141212528100835	0.5439599290909773	0.3389166871329381	0.501202877119264	0.6527273611636037	1.0996654828504622	0.9797255932130133	0.9719499454439812	1.129178344092619	1.146180147501592	1.0747555354004896	0.4143537263935754	0.6850811740172937	0.44833597669407954	1.2156412615560455	1.1383088826211658	0.6072890448786901	0.5504225045395477	0.5745966581911359
VI04|1	0.22180057405528508	0.9090416488982591	0	0.5561980613931146	0.38092176813151835	0.5349718082257431	0.5462940902434962	0.9040292784330349	0.7784150181078882	0.7738513922692245	0.7955261335995802	1.152363947696533	0.7557046241262324	0.992324586671529	0.7411700321058554	0.6587284580064732	0.8406842772489397	1.3409605859982072	1.4223908112555033	1.6346844004655954	1.0978032878475692	1.493950239734373	1.363036425537029	1.4728903140857517	1.662139769993141	0.32288478518486685	0.16593545281399968	0.14412290660314797	0.6858940315435791	0.5383634862120233	1.0329264069567081	0.722873308776395	0.641875232966931	0.8997428912317968	0.30191959506623844	0.7796637943042016	0.5889348183011689	0.8899240445266668	0.727419567620686	1.1462003786384087	0.9462313843894764	0.8055636179095017	0.36345393408484217	0.36484353363247335	0.6221043572763891	0.7531795011421845	0.2817525027989748	0.1995777133225215	0.25078217895702437
CA07|1.1	0.8207179804477445	1.2833480835854374	0.5561980613931146	0	0.7696915625497889	0.7326789539502121	0.8749223748029077	0.7729066354572431	0.6358992650495918	0.7511485597740519	1.2380224704221194	0.7980604646915137	0.9973359489420471	1.1319978721182524	1.0913556046214063	1.0502004137263894	1.0043793709291495	1.0434024776726265	1.0991485292751217	1.3172381641151771	1.0677889554632558	1.2242309539417784	1.0850807176472783	1.1842383945028456	1.264734435985042	0.660592192871684	0.6457531003969228	0.6421737475151336	0.6464894996193955	0.995644834602471	0.8125408246768062	0.8259236676501489	1.0181981655911532	0.9360807655829999	0.6982650202228999	0.8280771469505672	0.5946890042993733	0.5847492957646989	0.6440340679945068	0.8037918900405094	0.737202449574879	0.9280622047191259	0.7287674736911329	0.7084253740820303	0.7824443439169783	1.0472254051986474	0.7335179755222225	0.5848783952522937	0.8047581808239733
CA13|1.1.1	0.22011742853304428	0.3968990086995301	0.38092176813151835	0.7696915625497889	0	0.8263752420272932	0.7613274885266854	0.6195224213589676	1.1915867008715884	1.3543992072374231	0.41718540862432896	1.253054872517043	0.6112163855543798	1.2923068326420575	1.2413619697037102	0.2693765979306485	0.5420543245438951	1.6289653882792152	1.6169077304015085	1.2244746723750328	1.0644111822521043	1.5245635456149826	1.3695029939941068	1.6121658258440847	1.2844409790788658	0.1947356521120498	0.1500896513308545	0.3194221384703583	0.7547914099223483	0.418197715934162	0.5941160368512379	0.5480058343712775	0.4700034169131404	0.5993955302944906	0.2964211509989819	0.9726676834431933	0.8023368709012917	0.930391204549259	1.0329142615216862	1.2358428469708183	0.9765304989895447	0.397247200922743	0.3528285067380069	0.19045421471074553	1.0101207922088646	0.8753907388527146	0.26096364598247535	0.15062977501077268	0.24944400150470358
HN02|2.1	0.549892950443045	0.8790518006007111	0.5349718082257431	0.7326789539502121	0.8263752420272932	0	0.2160672623586669	0.5808653662555763	0.3558758564959563	0.5518149138499766	0.8809740251395459	0.7912064892670787	0.8183188877569141	0.94962306726537	0.7305610141033485	0.9376211603798095	0.8305338773230955	1.2671707132588066	1.4029215206771397	1.540718207135634	1.2012883148969933	1.5061875560073457	1.4138925542232537	1.4328174025910991	1.680359983179563	0.8588836496800403	0.6006891661501523	0.49728496772719644	0.35791866315630116	0.6980771392533673	0.7814971676856712	0.4426784587256565	0.4322482679371077	0.5628816766546794	0.46063091608258633	0.42334096121413145	0.19005961622188394	0.5671495644707709	0.3418990160334707	0.7536803920545522	0.45906372823630914	0.8765758898000552	0.511838537938059	0.6705831232400137	0.7041227657181793	0.9731593016687022	0.6622352542430173	0.5155486863592582	0.766536115159438
IN05|2.1.3.2	0.4018845931231605	0.6808930610910564	0.5462940902434962	0.8749223748029077	0.7613274885266854	0.2160672623586669	0	0.37221842348665213	0.7027582860437187	0.5263391201782779	0.7592313718564833	1.0945839671027668	0.8857519976475198	0.7948984409770908	0.5262506016058224	0.6982787956880327	0.8507685355070832	1.0996418671803148	1.3111099516863052	1.5337347603989546	1.0766106212782565	1.4814125312688535	1.330355171179711	1.3907394047215857	1.745701622796688	0.8628090051258537	0.6011843582730978	0.5787613084440375	0.6789872903874357	0.7522125383790161	0.6812685057097128	0.39924843337307403	0.48703170418419695	0.6201023057165959	0.587066533674709	0.7938046218609665	0.6073117109416583	0.9906750143075146	0.6021066056542926	1.0385885404316113	0.832309740772011	1.0320751071407408	0.6588437139022758	0.7712910320653514	0.8097890456342978	0.8473731509684528	0.6314624727399718	0.536923423631013	0.5482242097941943
IN11|2.1.3.2a	0.6063632364075422	0.4420221121795723	0.9040292784330349	0.7729066354572431	0.6195224213589676	0.5808653662555763	0.37221842348665213	0	0.978570573081198	1.0607526460760495	0.7651775940810959	1.103920871673304	0.8945321074936744	1.098677107620523	1.0301325104982963	0.6330596920249167	0.567104346553549	1.2596941327194915	1.322483493524008	1.2025716057769715	1.0659509282063537	1.3794104024071914	1.2562362728743968	1.3497207480123343	1.3557082666736422	0.8063281258691714	0.7189352771144526	0.798676249552223	0.7547242941768806	0.8121927830133624	0.15882351332594113	0.36654403345724307	0.3456212461151429	0.3974301315360055	0.6569511376074173	1.0626294825839444	0.8182939173914584	0.9258947659438409	0.8861647688924756	1.0679029934510813	0.9016337850824458	0.684909524427906	0.7063211567924013	0.7429669701367111	1.066214193695943	1.0234441761765711	0.7945393540880695	0.6343430600367954	0.7035193320063137
IN06|2.2	0.9733063952623171	1.230068647923048	0.7784150181078882	0.6358992650495918	1.1915867008715884	0.3558758564959563	0.7027582860437187	0.978570573081198	0	0.41636508405179107	1.1941061424567128	0.3875469806976003	1.0063642014000806	0.8774118390431466	0.7147002904143442	1.2268262214301102	1.114263558351515	1.1504907118056438	1.2152219492945975	1.4237753230369108	1.1703061666597123	1.3903036187329314	1.3358795496504698	1.2661262313073256	1.4347806965477294	1.0503120944060025	0.9396348000643888	0.6446233962440306	0.24154802735019543	0.9922213249954631	1.0975302406208105	0.8357383319038225	0.8021752889327253	0.8293487665099635	0.6796880513578518	0.387338378577866	0.24337987980776954	0.26514072411229705	0.18433496156627716	0.3789955929746708	0.405796159472642	1.0459995860652942	0.7540700169032302	0.8928149255109229	0.811460801137107	0.9851692746523574	0.8331225335728656	0.852424564406376	1.037992068832606
EG10|2.2.1	0.8994801080800432	1.4488036182339177	0.7738513922692245	0.7511485597740519	1.3543992072374231	0.5518149138499766	0.5263391201782779	1.0607526460760495	0.41636508405179107	0	1.1624367644945313	0.6395860860806779	1.0077791866970938	0.34251804491355065	0.19758725086142648	1.2817730639748546	1.2164783586684114	0.769079960716904	0.9856212970583079	1.5001098374083583	1.0031533096372152	1.2014379725562796	1.185450458869544	1.0542570511704596	1.5412007211284267	1.3485054504814253	1.1388045026985854	0.8881086407625718	0.7291305851396701	1.0455944163299191	1.278230139437854	1.001460314708194	1.210444772575944	1.070693271725599	1.00371871472556	0.5714838463077566	0.680117170359227	0.9089879726251904	0.3961992136212188	0.6218438915213791	0.6794277702597128	1.5007682210706315	1.006427228673405	1.2962942296973932	0.9633156797453607	0.6514354775279908	1.0508066732274066	1.0331131776340676	0.8931818166442536
EG08|2.2.1.1	0.44034776235302586	0.35317138323087605	0.7955261335995802	1.2380224704221194	0.41718540862432896	0.8809740251395459	0.7592313718564833	0.7651775940810959	1.1941061424567128	1.1624367644945313	0	1.0042753916806468	0.441123282887374	1.102555814313409	0.861667075099154	0.20368946044849312	0.46461310491298125	1.5782583025176753	1.6203491705606288	1.076332169357182	0.9605242798269369	1.439411331634433	1.475590264718696	1.6381679418339927	1.0647808268378494	0.7204700452496997	0.6145589246305055	0.6895888348189836	0.8219833357728743	0.2870850771224972	0.6926786911867815	0.6706756413045587	0.5966099339500344	0.559140633588214	0.5193443768732381	0.735175840767806	0.889245145451361	1.0453552269864623	0.9869432707086377	0.9702485404539642	0.915005782756399	0.5541491805639264	0.46487691762451944	0.5740837893822	1.4417243136950257	0.8441316097161459	0.5588660988964005	0.5508274566323526	0.3486841965312243
EG14|2.2.1.2	1.165098149977453	1.1889668039595873	1.152363947696533	0.7980604646915137	1.253054872517043	0.7912064892670787	1.0945839671027668	1.103920871673304	0.3875469806976003	0.6395860860806779	1.0042753916806468	0	0.8006032267703288	0.9616813787581922	0.9987248808233136	1.2345307671942927	0.9472249697375201	1.3087500347180812	1.2549048611375326	0.9726409258988937	1.1305259548756206	1.2949718802243617	1.4247171810998787	1.3827373510046965	0.8239169442315843	1.329723018098596	1.2722975995217505	0.9638518303548589	0.3655019541405632	0.9563164256310281	0.8681682160187602	0.8638805485952461	0.9562366372502152	0.5971746584173594	0.9754341909867507	0.2698140838194165	0.4342506851482677	0.24301057158147776	0.25624715185013536	0.0058906548001452785	0.1646812654418367	0.8156022531291351	0.856835327567424	1.0355643125459757	1.3306116058737607	1.0161735784517882	1.0975790031443764	0.9815637942475423	1.135597556977775
HK07|2.3.2.1	0.673241752837244	0.7977936648669917	0.7557046241262324	0.9973359489420471	0.6112163855543798	0.8183188877569141	0.8857519976475198	0.8945321074936744	1.0063642014000806	1.0077791866970938	0.441123282887374	0.8006032267703288	0	0.9382118008178296	0.8626623994927403	0.5963379099276975	0.43002011622447545	1.558860095095862	1.5998996508292844	1.1091278153660653	0.9251852002017161	1.4832498254674733	1.537051655380158	1.5460562196006533	1.0354650656697524	0.9142800934875482	0.7398089759632229	0.7273496044086958	0.80509893760855	0.355765533121687	0.6877312879297357	0.7972148421935068	0.678973864126489	0.46321987728532965	0.5339681340390956	0.4782946739266897	0.7212311898656816	0.902924305736015	0.775612218103024	0.7910815411751169	0.6706276294126955	0.49433502911476435	0.30929326695537784	0.659234097681934	1.353990173666256	0.7507751797476039	0.7177420261021579	0.6303015490328545	0.5429992743616197
HK10|2.3.2.1b	1.0967721734642675	1.3939796450659792	0.992324586671529	1.1319978721182524	1.2923068326420575	0.94962306726537	0.7948984409770908	1.098677107620523	0.8774118390431466	0.34251804491355065	1.102555814313409	0.9616813787581922	0.9382118008178296	0	0.3132511556347045	1.1430016804132896	0.8353630076218345	0.8891095761693407	1.0548273997535316	1.3582006473087331	1.0475112452529047	1.0610855428675365	1.21759231984805	0.843603495696574	1.330589994249234	1.291897198345855	1.1922070814462107	1.072722413100097	1.0696916319562497	0.8596629227726227	1.3261084965313004	1.1943046926120915	1.2028098634718192	1.1168765316505167	1.0714960510849156	0.8226186110494585	1.1413456386173577	1.2476808998849158	0.8724261680169392	0.9500457360989363	0.97191275157959	1.382236891981282	1.0501599809171067	1.3665695307733885	1.0792031957771537	0.2593423646647094	1.1079861590123623	1.1946861635380561	0.9567425293817625
VI12|2.3.2.1c	0.7875998197885323	1.209708206897696	0.7411700321058554	1.0913556046214063	1.2413619697037102	0.7305610141033485	0.5262506016058224	1.0301325104982963	0.7147002904143442	0.19758725086142648	0.861667075099154	0.9987248808233136	0.8626623994927403	0.3132511556347045	0	1.0270454029412845	1.028916949464361	0.8242336743783191	1.0381279127606968	1.5161679959404946	0.8481300398001289	1.1791374609094614	1.1671628302297878	1.047838299098451	1.5707828314487093	1.28138855210819	1.0947808882839363	0.9080007650600828	0.9820367537325673	0.8567401628207185	1.2905799752949516	1.128207947188257	1.1456188308063606	1.1476119661317639	0.9368937004290031	0.7888898381932671	0.9751650138867844	1.264202390495724	0.7060487473522277	0.9804592245268414	1.0685647707518735	1.480379393794097	0.9458554410004855	1.2808446561378524	1.0831731886200164	0.527341121430579	1.0158850675596833	1.095391734872325	0.6645914385691585
HK08|2.3.4	0.44543317392251536	0.27683703101333723	0.6587284580064732	1.0502004137263894	0.2693765979306485	0.9376211603798095	0.6982787956880327	0.6330596920249167	1.2268262214301102	1.2817730639748546	0.20368946044849312	1.2345307671942927	0.5963379099276975	1.1430016804132896	1.0270454029412845	0	0.48357824216574974	1.5900801089263794	1.6434494159684525	1.121427528986153	0.9902066697341823	1.448640501110669	1.4397042524480825	1.6568853908989305	1.2167178800905876	0.3848077223173506	0.37649989447689614	0.5271854057317452	0.8436356374754347	0.35206747922389225	0.6156641019924944	0.5604019706669112	0.4680991776849488	0.5814215401402257	0.362762336063972	0.9915808051518954	0.9853130075872544	1.0334688220565547	1.09594146821484	1.1979573672034203	1.1059618281480632	0.457185075530656	0.42765955740705	0.3548696920697264	1.2502312552288162	0.7822523362123003	0.2768166720659905	0.38684340231970415	0.2642730702288154
BA18|2.3.2.1a	0.7558967442950856	0.6408505242610234	0.8406842772489397	1.0043793709291495	0.5420543245438951	0.8305338773230955	0.8507685355070832	0.567104346553549	1.114263558351515	1.2164783586684114	0.46461310491298125	0.9472249697375201	0.43002011622447545	0.8353630076218345	1.028916949464361	0.48357824216574974	0	1.7670736281327697	1.8090597892545057	1.1423593115966557	1.131471744016187	1.453916270297218	1.5675880945718417	1.5386576880810585	1.1352839273193434	0.7445241768988546	0.6912036000631446	0.7225622651458785	0.7055249299448025	0.17432553448408483	0.48568525471502566	0.6529725034013739	0.4281149239970531	0.3664505924495721	0.4186701182746182	0.6106229530459542	0.7976490848661221	0.8319310959315709	0.8965926439390797	0.939437779941957	0.7847191971456695	0.3790916635770495	0.3756866644159068	0.5853359876420471	1.3941318244948946	0.5152582473099663	0.6416919735829094	0.5912814888095361	0.6037224844278164
CR21|2.3.4.4b	1.412560793983047	1.463695330911512	1.3409605859982072	1.0434024776726265	1.6289653882792152	1.2671707132588066	1.0996418671803148	1.2596941327194915	1.1504907118056438	0.769079960716904	1.5782583025176753	1.3087500347180812	1.558860095095862	0.8891095761693407	0.8242336743783191	1.5900801089263794	1.7670736281327697	0	0.07262884015644144	0.8488368605693835	0.9097135924441638	0.3556861039410345	0.20250778961190208	0.17957649865533776	0.8355792238018124	1.4512672384649745	1.484470696358322	1.509300286091847	1.5968956208694287	1.7902576117968434	1.4619731016543875	1.5302021463814386	1.6518483273921554	1.741855196455124	1.7783861544540822	1.5680197707243453	1.5236198799550182	1.5029063105530676	1.390402126350342	1.3038507288720904	1.469107731504369	1.7611607670124547	1.7613530279154175	1.6875773746297607	0.6470836121805827	1.2579580931519856	1.6008648412166147	1.6564225026866302	1.5329855848879195
HY16|2.3.4.4e	1.5034209033236947	1.4294828910800816	1.4223908112555033	1.0991485292751217	1.6169077304015085	1.4029215206771397	1.3111099516863052	1.322483493524008	1.2152219492945975	0.9856212970583079	1.6203491705606288	1.2549048611375326	1.5998996508292844	1.0548273997535316	1.0381279127606968	1.6434494159684525	1.8090597892545057	0.07262884015644144	0	0.7060222869458757	0.9059443713633794	0.2798460729962593	0.22255964036986953	0.15495167282274813	0.6395413822063898	1.4237357307618437	1.5329079522960152	1.5896668189480176	1.6088572556629135	1.8800527937534082	1.420503364785775	1.5525792323193128	1.6504062785413458	1.7304299052757792	1.8155722842177413	1.6229994769999485	1.5454571035294775	1.4322816510840177	1.4597121864262552	1.2679753443053277	1.4263120668608698	1.6697473827196434	1.811647345842032	1.6672065106175316	0.6636007681530114	1.413279759307943	1.6737174834256336	1.702949134547361	1.6106571005438486
SI14|2.3.4.4b	1.4598571852466626	0.9720201682463747	1.6346844004655954	1.3172381641151771	1.2244746723750328	1.540718207135634	1.5337347603989546	1.2025716057769715	1.4237753230369108	1.5001098374083583	1.076332169357182	0.9726409258988937	1.1091278153660653	1.3582006473087331	1.5161679959404946	1.121427528986153	1.1423593115966557	0.8488368605693835	0.7060222869458757	0	1.0418109868540522	0.7492297922702269	0.5944161711264552	0.6367219099705292	0.34570826221608264	1.2487199688206072	1.40913708187403	1.491564351587838	1.2749498447498848	1.2733027036983762	0.9618506476052852	1.2216766594559256	1.2642500242482873	1.147770025290085	1.5301221872047421	1.3067947826694517	1.3621297789496385	1.1124787557731253	1.404292482102072	0.9818281803972743	1.117543091921428	0.9407337709684661	1.368574960450842	1.2757425212652123	1.4140552709037757	1.3307347550598538	1.4454123069536433	1.4303446144173804	1.4893063097423926
GD18|2.3.4.4h	1.0423242515590432	0.8759490745856571	1.0978032878475692	1.0677889554632558	1.0644111822521043	1.2012883148969933	1.0766106212782565	1.0659509282063537	1.1703061666597123	1.0031533096372152	0.9605242798269369	1.1305259548756206	0.9251852002017161	1.0475112452529047	0.8481300398001289	0.9902066697341823	1.131471744016187	0.9097135924441638	0.9059443713633794	1.0418109868540522	0	1.0056517579063995	1.048505532107187	1.0599951528549816	0.8427867848810052	1.1591184105887316	1.2394320701757657	1.171918254777101	1.1011959788879715	1.203192500010416	0.9155349228137402	1.0602203792744145	1.1428525384884047	0.9899697281280718	1.2462132124482774	1.0794977217195714	1.1001527294411988	1.1352244239223475	1.045347476035774	1.1433296762904368	1.2121465709474444	1.0257477728619613	1.1259105282481163	0.9996130414928752	1.2642078787461681	0.9482946888163236	1.1885672096495052	1.1770897791079318	1.0047774163360133
VI20|2.3.4.4g	1.5596601165987483	1.2836306600163345	1.493950239734373	1.2242309539417784	1.5245635456149826	1.5061875560073457	1.4814125312688535	1.3794104024071914	1.3903036187329314	1.2014379725562796	1.439411331634433	1.2949718802243617	1.4832498254674733	1.0610855428675365	1.1791374609094614	1.448640501110669	1.453916270297218	0.3556861039410345	0.2798460729962593	0.7492297922702269	1.0056517579063995	0	0.4056954062895347	0.3269742047643597	0.5386098315693035	1.3768235315326318	1.5062828134809456	1.6338089416978356	1.7091881482829432	1.5751900567969677	1.4050110039010595	1.5949448041417273	1.5880590456417958	1.5567228354915887	1.6210958538090257	1.464182666100628	1.6209406842508587	1.4131845986158158	1.5761746359708955	1.307460390621542	1.4672892570507319	1.3660129049298613	1.749395933699851	1.4811220118681971	0.8477052714999244	1.4225853381307707	1.520418136252192	1.596582875799839	1.5767291222165807
WA14|2.3.4.4c	1.4047128106706699	1.2930388215661461	1.363036425537029	1.0850807176472783	1.3695029939941068	1.4138925542232537	1.330355171179711	1.2562362728743968	1.3358795496504698	1.185450458869544	1.475590264718696	1.4247171810998787	1.537051655380158	1.21759231984805	1.1671628302297878	1.4397042524480825	1.5675880945718417	0.20250778961190208	0.22255964036986953	0.5944161711264552	1.048505532107187	0.4056954062895347	0	0.25114736303553853	0.7295617905125784	1.228892498793841	1.356287258733002	1.451963983599734	1.5428726202621452	1.6483073273766344	1.3312381668779325	1.5079719399692149	1.5297855871740302	1.7127211158891467	1.6625478760872108	1.676989130944452	1.5548636453513973	1.43942223760477	1.526827730167705	1.437957508992391	1.5492710333741906	1.5367120882781926	1.6819034880166812	1.5062912177195078	0.752523205043931	1.2670117899053346	1.5243463699218265	1.581782169134411	1.5041929899062678
AS20|2.3.4.4b	1.612869869835992	1.5527788828861737	1.4728903140857517	1.1842383945028456	1.6121658258440847	1.4328174025910991	1.3907394047215857	1.3497207480123343	1.2661262313073256	1.0542570511704596	1.6381679418339927	1.3827373510046965	1.5460562196006533	0.843603495696574	1.047838299098451	1.6568853908989305	1.5386576880810585	0.17957649865533776	0.15495167282274813	0.6367219099705292	1.0599951528549816	0.3269742047643597	0.25114736303553853	0	0.6887240699193025	1.3974229343121665	1.5045999871717628	1.5976782160545322	1.6695691147014646	1.6505036977128849	1.51927484213132	1.656712013697275	1.6384808636623402	1.774006632823503	1.7451216844070123	1.60645823468922	1.6039198968651538	1.5208521576486431	1.5876983701651333	1.3963342632558855	1.5052903217171165	1.6236831403427265	1.7052578427792224	1.6843709390264432	0.6729124635222397	1.1994646623505933	1.6312212082596802	1.7431355614684048	1.6898837578620527
TE24|2.3.4.4b	1.5384722057195404	1.0169004145119707	1.662139769993141	1.264734435985042	1.2844409790788658	1.680359983179563	1.745701622796688	1.3557082666736422	1.4347806965477294	1.5412007211284267	1.0647808268378494	0.8239169442315843	1.0354650656697524	1.330589994249234	1.5707828314487093	1.2167178800905876	1.1352839273193434	0.8355792238018124	0.6395413822063898	0.34570826221608264	0.8427867848810052	0.5386098315693035	0.7295617905125784	0.6887240699193025	0	1.3023959020505291	1.493268956014903	1.5731729578942533	1.379004077823456	1.2895108307717955	1.0224209309477836	1.398787265912899	1.3873414960043928	1.165167721464262	1.5963070892115345	1.2032463561125972	1.425231845235843	1.0434075314714215	1.4325797816779369	0.8417466799805688	1.0428448104039207	0.8743593116121294	1.4113170331459333	1.2782339144027226	1.2354340468638716	1.370891115409288	1.486186697897112	1.482120994505824	1.55208458630994
EPI_ISL_164600	0.4130572973132204	0.5835805882862307	0.32288478518486685	0.660592192871684	0.1947356521120498	0.8588836496800403	0.8628090051258537	0.8063281258691714	1.0503120944060025	1.3485054504814253	0.7204700452496997	1.329723018098596	0.9142800934875482	1.291897198345855	1.28138855210819	0.3848077223173506	0.7445241768988546	1.4512672384649745	1.4237357307618437	1.2487199688206072	1.1591184105887316	1.3768235315326318	1.228892498793841	1.3974229343121665	1.3023959020505291	0	0.08687096826114227	0.24698534586120746	0.7887943094625821	0.562368516287181	0.8799211364997828	0.7693644714122357	0.5632843055704112	0.9414293635410613	0.32747960732998904	1.141463166281621	0.8397865720896591	0.8550206616607801	1.121796109828727	1.311926583931766	1.0955698678969394	0.49202780590683326	0.42394773965021093	0.20949494665364587	0.6752729281503902	0.9066802340229478	0.21951748507804747	0.2336610388313769	0.3992811903598795
EPI_ISL_98738	0.20956955079495676	0.5768252047448792	0.16593545281399968	0.6457531003969228	0.1500896513308545	0.6006891661501523	0.6011843582730978	0.7189352771144526	0.9396348000643888	1.1388045026985854	0.6145589246305055	1.2722975995217505	0.7398089759632229	1.1922070814462107	1.0947808882839363	0.37649989447689614	0.6912036000631446	1.484470696358322	1.5329079522960152	1.40913708187403	1.2394320701757657	1.5062828134809456	1.356287258733002	1.5045999871717628	1.493268956014903	0.08687096826114227	0	0.13246205933194843	0.7094692840760949	0.42613098786294024	0.8474812342327186	0.6339014296620475	0.45048640652047967	0.8015345549106451	0.22456288369718558	0.9380049862295831	0.6795200412993077	0.8760413035903007	0.9618950882317128	1.2420253187404964	0.9780918355886913	0.5135518437343994	0.2778065946556	0.17422380028875706	0.6400890611164504	0.883977149933129	0.13708061522580706	0.10055364970634273	0.2761823390889474
EPI_ISL_4046	0.2642447595762947	0.6890891262642622	0.14412290660314797	0.6421737475151336	0.3194221384703583	0.49728496772719644	0.5787613084440375	0.798676249552223	0.6446233962440306	0.8881086407625718	0.6895888348189836	0.9638518303548589	0.7273496044086958	1.072722413100097	0.9080007650600828	0.5271854057317452	0.7225622651458785	1.509300286091847	1.5896668189480176	1.491564351587838	1.171918254777101	1.6338089416978356	1.451963983599734	1.5976782160545322	1.5731729578942533	0.24698534586120746	0.13246205933194843	0	0.4736241786316375	0.4804141694612142	0.8970245769405502	0.713855500067119	0.4237857199661461	0.7345621182856866	0.25370230108091585	0.6821529068593867	0.5017235067061301	0.6294063498765061	0.673400453933867	0.928954039625984	0.7818326140738858	0.49323085073667605	0.257007671896605	0.18535562315979526	0.7323140568668941	0.7399283638840102	0.18389839238403483	0.12992797864036199	0.3119734407923703
EPI_ISL_79681	0.7088466753462326	0.8380742111614746	0.6858940315435791	0.6464894996193955	0.7547914099223483	0.35791866315630116	0.6789872903874357	0.7547242941768806	0.24154802735019543	0.7291305851396701	0.8219833357728743	0.3655019541405632	0.80509893760855	1.0696916319562497	0.9820367537325673	0.8436356374754347	0.7055249299448025	1.5968956208694287	1.6088572556629135	1.2749498447498848	1.1011959788879715	1.7091881482829432	1.5428726202621452	1.6695691147014646	1.379004077823456	0.7887943094625821	0.7094692840760949	0.4736241786316375	0	0.6684571524110685	0.702083061064104	0.46296765041664867	0.45503103406341805	0.4317562786895286	0.4648218757206738	0.2940423982505129	0.1175818123167377	0.13045943635664026	0.15224526678009698	0.36195034182745534	0.2737218857028425	0.6540385191378936	0.49340401497348174	0.5610722283398222	1.1387230718608548	0.8070774654190633	0.6664899397892743	0.5362735269148297	0.7761101638501061
EPI_ISL_17024123	0.4819916735889166	0.6496328405843899	0.5383634862120233	0.995644834602471	0.418197715934162	0.6980771392533673	0.7522125383790161	0.8121927830133624	0.9922213249954631	1.0455944163299191	0.2870850771224972	0.9563164256310281	0.355765533121687	0.8596629227726227	0.8567401628207185	0.35206747922389225	0.17432553448408483	1.7902576117968434	1.8800527937534082	1.2733027036983762	1.203192500010416	1.5751900567969677	1.6483073273766344	1.6505036977128849	1.2895108307717955	0.562368516287181	0.42613098786294024	0.4804141694612142	0.6684571524110685	0	0.7747649103502174	0.6631228787305024	0.49016005524399797	0.5235370125645851	0.24739518719851705	0.5066566928922618	0.6612040237239707	0.8723502924329353	0.8134168151631356	0.9412995860631288	0.7714562296833206	0.4551485796030108	0.18319111717361158	0.45379762360638864	1.217707730542505	0.5707297315314616	0.3734165259157213	0.38996496166934747	0.36290154735807156
EPI_ISL_98856	0.7430412698417289	0.42141212528100835	1.0329264069567081	0.8125408246768062	0.5941160368512379	0.7814971676856712	0.6812685057097128	0.15882351332594113	1.0975302406208105	1.278230139437854	0.6926786911867815	0.8681682160187602	0.6877312879297357	1.3261084965313004	1.2905799752949516	0.6156641019924944	0.48568525471502566	1.4619731016543875	1.420503364785775	0.9618506476052852	0.9155349228137402	1.4050110039010595	1.3312381668779325	1.51927484213132	1.0224209309477836	0.8799211364997828	0.8474812342327186	0.8970245769405502	0.702083061064104	0.7747649103502174	0	0.3307553064855234	0.346268056767158	0.21256118359524856	0.6914822429695286	0.9100305833248532	0.7656461793446848	0.7748112566644718	0.8363943250335009	0.8586964690760612	0.7078745372570272	0.4463689757006589	0.6547852751028571	0.685266066264127	1.3294016602880372	1.0957057429025054	0.8482892020721565	0.6575615121622611	0.7596471821794304
EPI_ISL_5773	0.5094394194414755	0.5439599290909773	0.722873308776395	0.8259236676501489	0.5480058343712775	0.4426784587256565	0.39924843337307403	0.36654403345724307	0.8357383319038225	1.001460314708194	0.6706756413045587	0.8638805485952461	0.7972148421935068	1.1943046926120915	1.128207947188257	0.5604019706669112	0.6529725034013739	1.5302021463814386	1.5525792323193128	1.2216766594559256	1.0602203792744145	1.5949448041417273	1.5079719399692149	1.656712013697275	1.398787265912899	0.7693644714122357	0.6339014296620475	0.713855500067119	0.46296765041664867	0.6631228787305024	0.3307553064855234	0	0.3060501665619887	0.21481216776312595	0.4759028181042726	0.7107280703335632	0.43169454119485295	0.6954256759002913	0.523250397789393	0.8676013663363233	0.6163433691866943	0.7166967814426386	0.5571021681853214	0.6411103031817711	1.090824915142606	0.984526476362219	0.6208736277840755	0.45722465078489316	0.6119842150692485
EPI_ISL_343411	0.5014461746007575	0.3389166871329381	0.641875232966931	1.0181981655911532	0.4700034169131404	0.4322482679371077	0.48703170418419695	0.3456212461151429	0.8021752889327253	1.210444772575944	0.5966099339500344	0.9562366372502152	0.678973864126489	1.2028098634718192	1.1456188308063606	0.4680991776849488	0.4281149239970531	1.6518483273921554	1.6504062785413458	1.2642500242482873	1.1428525384884047	1.5880590456417958	1.5297855871740302	1.6384808636623402	1.3873414960043928	0.5632843055704112	0.45048640652047967	0.4237857199661461	0.45503103406341805	0.49016005524399797	0.346268056767158	0.3060501665619887	0	0.2593372825071232	0.3418398646604519	0.7225894625337055	0.5053600425558418	0.647953635623967	0.7309400593487811	0.932432697491469	0.7039432549508923	0.34333087287418773	0.3349242357154285	0.37644137977348435	0.9693682371525016	0.8901984055117633	0.4634025193897934	0.3955334668109294	0.5811100370153416
EPI_ISL_343382	0.659712352344515	0.501202877119264	0.8997428912317968	0.9360807655829999	0.5993955302944906	0.5628816766546794	0.6201023057165959	0.3974301315360055	0.8293487665099635	1.070693271725599	0.559140633588214	0.5971746584173594	0.46321987728532965	1.1168765316505167	1.1476119661317639	0.5814215401402257	0.3664505924495721	1.741855196455124	1.7304299052757792	1.147770025290085	0.9899697281280718	1.5567228354915887	1.7127211158891467	1.774006632823503	1.165167721464262	0.9414293635410613	0.8015345549106451	0.7345621182856866	0.4317562786895286	0.5235370125645851	0.21256118359524856	0.21481216776312595	0.2593372825071232	0	0.4793081607482448	0.43905092080814345	0.449853854092799	0.5368631070982977	0.49403341968741654	0.5901272136891357	0.4382485019343074	0.3670637125995657	0.4483320787208853	0.5634651992695363	1.4026691811663226	0.906228609241262	0.6934193511697897	0.5007874963074828	0.6688494044351445
EPI_ISL_5769	0.3986568696497992	0.6527273611636037	0.30191959506623844	0.6982650202228999	0.2964211509989819	0.46063091608258633	0.587066533674709	0.6569511376074173	0.6796880513578518	1.00371871472556	0.5193443768732381	0.9754341909867507	0.5339681340390956	1.0714960510849156	0.9368937004290031	0.362762336063972	0.4186701182746182	1.7783861544540822	1.8155722842177413	1.5301221872047421	1.2462132124482774	1.6210958538090257	1.6625478760872108	1.7451216844070123	1.5963070892115345	0.32747960732998904	0.22456288369718558	0.25370230108091585	0.4648218757206738	0.24739518719851705	0.6914822429695286	0.4759028181042726	0.3418398646604519	0.4793081607482448	0	0.559556910736327	0.43037001231135785	0.6298284221045104	0.6126416835138067	0.9647492354767384	0.7011499792537741	0.4486757809472274	0.15850323340414463	0.24353601256196267	0.9248695047266631	0.7805890307391543	0.15541144219587488	0.18329782959046426	0.2714573078932512
EPI_ISL_11384	0.8558114820225862	1.0996654828504622	0.7796637943042016	0.8280771469505672	0.9726676834431933	0.42334096121413145	0.7938046218609665	1.0626294825839444	0.387338378577866	0.5714838463077566	0.735175840767806	0.2698140838194165	0.4782946739266897	0.8226186110494585	0.7888898381932671	0.9915808051518954	0.6106229530459542	1.5680197707243453	1.6229994769999485	1.3067947826694517	1.0794977217195714	1.464182666100628	1.676989130944452	1.60645823468922	1.2032463561125972	1.141463166281621	0.9380049862295831	0.6821529068593867	0.2940423982505129	0.5066566928922618	0.9100305833248532	0.7107280703335632	0.7225894625337055	0.43905092080814345	0.559556910736327	0	0.21269587337765905	0.33376522931694697	0.19761544553311283	0.2630857421576487	0.1848172961310891	0.6736905013552146	0.49557252811454355	0.733274849646849	1.2607586382564	0.7885369637999249	0.7867443915262071	0.6648206848517373	0.8517286693373368
EPI_ISL_11872	0.6770990154325052	0.9797255932130133	0.5889348183011689	0.5946890042993733	0.8023368709012917	0.19005961622188394	0.6073117109416583	0.8182939173914584	0.24337987980776954	0.680117170359227	0.889245145451361	0.4342506851482677	0.7212311898656816	1.1413456386173577	0.9751650138867844	0.9853130075872544	0.7976490848661221	1.5236198799550182	1.5454571035294775	1.3621297789496385	1.1001527294411988	1.6209406842508587	1.5548636453513973	1.6039198968651538	1.425231845235843	0.8397865720896591	0.6795200412993077	0.5017235067061301	0.1175818123167377	0.6612040237239707	0.7656461793446848	0.43169454119485295	0.5053600425558418	0.449853854092799	0.43037001231135785	0.21269587337765905	0	0.2198910010890892	0.1430760490730305	0.4357106564975525	0.22892540549552276	0.7052465984523753	0.42766017195671346	0.5883786777116313	0.9348340758946039	1.0041972707497002	0.6791960824734082	0.5014225328575745	0.817193964513617
EPI_ISL_89366	1.0099765111493917	0.9719499454439812	0.8899240445266668	0.5847492957646989	0.930391204549259	0.5671495644707709	0.9906750143075146	0.9258947659438409	0.26514072411229705	0.9089879726251904	1.0453552269864623	0.24301057158147776	0.902924305736015	1.2476808998849158	1.264202390495724	1.0334688220565547	0.8319310959315709	1.5029063105530676	1.4322816510840177	1.1124787557731253	1.1352244239223475	1.4131845986158158	1.43942223760477	1.5208521576486431	1.0434075314714215	0.8550206616607801	0.8760413035903007	0.6294063498765061	0.13045943635664026	0.8723502924329353	0.7748112566644718	0.6954256759002913	0.647953635623967	0.5368631070982977	0.6298284221045104	0.33376522931694697	0.2198910010890892	0	0.2549806725381587	0.2428054626967483	0.24950728178214243	0.5592154248172959	0.6644456510932142	0.59257980344584	1.076315399752724	1.0642344842681202	0.7844445543210095	0.6704803734650343	1.0479518800919516
EPI_ISL_31745	0.8043814613546978	1.129178344092619	0.727419567620686	0.6440340679945068	1.0329142615216862	0.3418990160334707	0.6021066056542926	0.8861647688924756	0.18433496156627716	0.3961992136212188	0.9869432707086377	0.25624715185013536	0.775612218103024	0.8724261680169392	0.7060487473522277	1.09594146821484	0.8965926439390797	1.390402126350342	1.4597121864262552	1.404292482102072	1.045347476035774	1.5761746359708955	1.526827730167705	1.5876983701651333	1.4325797816779369	1.121796109828727	0.9618950882317128	0.673400453933867	0.15224526678009698	0.8134168151631356	0.8363943250335009	0.523250397789393	0.7309400593487811	0.49403341968741654	0.6126416835138067	0.19761544553311283	0.1430760490730305	0.2549806725381587	0	0.26254476032535445	0.22662388889922225	0.9496212492110075	0.647885673973049	0.8497276457102184	1.1313971329291685	0.831154655969624	0.8368736398992935	0.6981651556618149	0.8294936104580123
EPI_ISL_262572	1.1354705969783707	1.146180147501592	1.1462003786384087	0.8037918900405094	1.2358428469708183	0.7536803920545522	1.0385885404316113	1.0679029934510813	0.3789955929746708	0.6218438915213791	0.9702485404539642	0.0058906548001452785	0.7910815411751169	0.9500457360989363	0.9804592245268414	1.1979573672034203	0.939437779941957	1.3038507288720904	1.2679753443053277	0.9818281803972743	1.1433296762904368	1.307460390621542	1.437957508992391	1.3963342632558855	0.8417466799805688	1.311926583931766	1.2420253187404964	0.928954039625984	0.36195034182745534	0.9412995860631288	0.8586964690760612	0.8676013663363233	0.932432697491469	0.5901272136891357	0.9647492354767384	0.2630857421576487	0.4357106564975525	0.2428054626967483	0.26254476032535445	0	0.15583665154117077	0.7869573487331598	0.8406856272925962	1.003418518580627	1.3238294105351978	1.0184548612134598	1.065842055822139	0.9506049490826904	1.1183416546575404
EPI_ISL_31736	0.9542882907383603	1.0747555354004896	0.9462313843894764	0.737202449574879	0.9765304989895447	0.45906372823630914	0.832309740772011	0.9016337850824458	0.405796159472642	0.6794277702597128	0.915005782756399	0.1646812654418367	0.6706276294126955	0.97191275157959	1.0685647707518735	1.1059618281480632	0.7847191971456695	1.469107731504369	1.4263120668608698	1.117543091921428	1.2121465709474444	1.4672892570507319	1.5492710333741906	1.5052903217171165	1.0428448104039207	1.0955698678969394	0.9780918355886913	0.7818326140738858	0.2737218857028425	0.7714562296833206	0.7078745372570272	0.6163433691866943	0.7039432549508923	0.4382485019343074	0.7011499792537741	0.1848172961310891	0.22892540549552276	0.24950728178214243	0.22662388889922225	0.15583665154117077	0	0.6644975810646054	0.6306337342248325	0.8244039337147684	1.1690586007775368	0.9818586048084148	0.9011716249713672	0.7124715508904718	1.015119241703322
EPI_ISL_18823967	0.7134224579319599	0.4143537263935754	0.8055636179095017	0.9280622047191259	0.397247200922743	0.8765758898000552	1.0320751071407408	0.684909524427906	1.0459995860652942	1.5007682210706315	0.5541491805639264	0.8156022531291351	0.49433502911476435	1.382236891981282	1.480379393794097	0.457185075530656	0.3790916635770495	1.7611607670124547	1.6697473827196434	0.9407337709684661	1.0257477728619613	1.3660129049298613	1.5367120882781926	1.6236831403427265	0.8743593116121294	0.49202780590683326	0.5135518437343994	0.49323085073667605	0.6540385191378936	0.4551485796030108	0.4463689757006589	0.7166967814426386	0.34333087287418773	0.3670637125995657	0.4486757809472274	0.6736905013552146	0.7052465984523753	0.5592154248172959	0.9496212492110075	0.7869573487331598	0.6644975810646054	0	0.34507015321340406	0.2072159144507869	1.2056707784893508	1.029977836219508	0.45897110596685164	0.38279326059463836	0.6699075811236861
EPI_ISL_268	0.4125702358480815	0.6850811740172937	0.36345393408484217	0.7287674736911329	0.3528285067380069	0.511838537938059	0.6588437139022758	0.7063211567924013	0.7540700169032302	1.006427228673405	0.46487691762451944	0.856835327567424	0.30929326695537784	1.0501599809171067	0.9458554410004855	0.42765955740705	0.3756866644159068	1.7613530279154175	1.811647345842032	1.368574960450842	1.1259105282481163	1.749395933699851	1.6819034880166812	1.7052578427792224	1.4113170331459333	0.42394773965021093	0.2778065946556	0.257007671896605	0.49340401497348174	0.18319111717361158	0.6547852751028571	0.5571021681853214	0.3349242357154285	0.4483320787208853	0.15850323340414463	0.49557252811454355	0.42766017195671346	0.6644456510932142	0.647885673973049	0.8406856272925962	0.6306337342248325	0.34507015321340406	0	0.2754162984556987	0.9714489291673821	0.7161787137329265	0.2711753649305929	0.23908855562417275	0.30311815473784365
EPI_ISL_166660	0.3903445069528597	0.44833597669407954	0.36484353363247335	0.7084253740820303	0.19045421471074553	0.6705831232400137	0.7712910320653514	0.7429669701367111	0.8928149255109229	1.2962942296973932	0.5740837893822	1.0355643125459757	0.659234097681934	1.3665695307733885	1.2808446561378524	0.3548696920697264	0.5853359876420471	1.6875773746297607	1.6672065106175316	1.2757425212652123	0.9996130414928752	1.4811220118681971	1.5062912177195078	1.6843709390264432	1.2782339144027226	0.20949494665364587	0.17422380028875706	0.18535562315979526	0.5610722283398222	0.45379762360638864	0.685266066264127	0.6411103031817711	0.37644137977348435	0.5634651992695363	0.24353601256196267	0.733274849646849	0.5883786777116313	0.59257980344584	0.8497276457102184	1.003418518580627	0.8244039337147684	0.2072159144507869	0.2754162984556987	0	0.900126584296321	0.9707071742869506	0.16091748200324407	0.12296046391935733	0.3835526631833447
EPI_ISL_67998	0.9053004474719051	1.2156412615560455	0.6221043572763891	0.7824443439169783	1.0101207922088646	0.7041227657181793	0.8097890456342978	1.066214193695943	0.811460801137107	0.9633156797453607	1.4417243136950257	1.3306116058737607	1.353990173666256	1.0792031957771537	1.0831731886200164	1.2502312552288162	1.3941318244948946	0.6470836121805827	0.6636007681530114	1.4140552709037757	1.2642078787461681	0.8477052714999244	0.752523205043931	0.6729124635222397	1.2354340468638716	0.6752729281503902	0.6400890611164504	0.7323140568668941	1.1387230718608548	1.217707730542505	1.3294016602880372	1.090824915142606	0.9693682371525016	1.4026691811663226	0.9248695047266631	1.2607586382564	0.9348340758946039	1.076315399752724	1.1313971329291685	1.3238294105351978	1.1690586007775368	1.2056707784893508	0.9714489291673821	0.900126584296321	0	1.2054197889031766	0.797876823751022	0.876522575355405	1.080183356656373
EPI_ISL_891209	0.8830799488582801	1.1383088826211658	0.7531795011421845	1.0472254051986474	0.8753907388527146	0.9731593016687022	0.8473731509684528	1.0234441761765711	0.9851692746523574	0.6514354775279908	0.8441316097161459	1.0161735784517882	0.7507751797476039	0.2593423646647094	0.527341121430579	0.7822523362123003	0.5152582473099663	1.2579580931519856	1.413279759307943	1.3307347550598538	0.9482946888163236	1.4225853381307707	1.2670117899053346	1.1994646623505933	1.370891115409288	0.9066802340229478	0.883977149933129	0.7399283638840102	0.8070774654190633	0.5707297315314616	1.0957057429025054	0.984526476362219	0.8901984055117633	0.906228609241262	0.7805890307391543	0.7885369637999249	1.0041972707497002	1.0642344842681202	0.831154655969624	1.0184548612134598	0.9818586048084148	1.029977836219508	0.7161787137329265	0.9707071742869506	1.2054197889031766	0	0.8362141703304522	0.8910108816599482	0.6566767344977587
EPI_ISL_173687	0.3769546384528495	0.6072890448786901	0.2817525027989748	0.7335179755222225	0.26096364598247535	0.6622352542430173	0.6314624727399718	0.7945393540880695	0.8331225335728656	1.0508066732274066	0.5588660988964005	1.0975790031443764	0.7177420261021579	1.1079861590123623	1.0158850675596833	0.2768166720659905	0.6416919735829094	1.6008648412166147	1.6737174834256336	1.4454123069536433	1.1885672096495052	1.520418136252192	1.5243463699218265	1.6312212082596802	1.486186697897112	0.21951748507804747	0.13708061522580706	0.18389839238403483	0.6664899397892743	0.3734165259157213	0.8482892020721565	0.6208736277840755	0.4634025193897934	0.6934193511697897	0.15541144219587488	0.7867443915262071	0.6791960824734082	0.7844445543210095	0.8368736398992935	1.065842055822139	0.9011716249713672	0.45897110596685164	0.2711753649305929	0.16091748200324407	0.797876823751022	0.8362141703304522	0	0.14396090169167686	0.25814216443163307
EPI_ISL_10049	0.1815077996568043	0.5504225045395477	0.1995777133225215	0.5848783952522937	0.15062977501077268	0.5155486863592582	0.536923423631013	0.6343430600367954	0.852424564406376	1.0331131776340676	0.5508274566323526	0.9815637942475423	0.6303015490328545	1.1946861635380561	1.095391734872325	0.38684340231970415	0.5912814888095361	1.6564225026866302	1.702949134547361	1.4303446144173804	1.1770897791079318	1.596582875799839	1.581782169134411	1.7431355614684048	1.482120994505824	0.2336610388313769	0.10055364970634273	0.12992797864036199	0.5362735269148297	0.38996496166934747	0.6575615121622611	0.45722465078489316	0.3955334668109294	0.5007874963074828	0.18329782959046426	0.6648206848517373	0.5014225328575745	0.6704803734650343	0.6981651556618149	0.9506049490826904	0.7124715508904718	0.38279326059463836	0.23908855562417275	0.12296046391935733	0.876522575355405	0.8910108816599482	0.14396090169167686	0	0.23930324359275545
EPI_ISL_281682	0.18834239624529914	0.5745966581911359	0.25078217895702437	0.8047581808239733	0.24944400150470358	0.766536115159438	0.5482242097941943	0.7035193320063137	1.037992068832606	0.8931818166442536	0.3486841965312243	1.135597556977775	0.5429992743616197	0.9567425293817625	0.6645914385691585	0.2642730702288154	0.6037224844278164	1.5329855848879195	1.6106571005438486	1.4893063097423926	1.0047774163360133	1.5767291222165807	1.5041929899062678	1.6898837578620527	1.55208458630994	0.3992811903598795	0.2761823390889474	0.3119734407923703	0.7761101638501061	0.36290154735807156	0.7596471821794304	0.6119842150692485	0.5811100370153416	0.6688494044351445	0.2714573078932512	0.8517286693373368	0.817193964513617	1.0479518800919516	0.8294936104580123	1.1183416546575404	1.015119241703322	0.6699075811236861	0.30311815473784365	0.3835526631833447	1.080183356656373	0.6566767344977587	0.25814216443163307	0.23930324359275545	0
EPI_ISL_96894	0.8329498433090976	0.8153997837956305	0.9605868109397104	1.2420704720191988	0.864411848784109	0.9575065209653968	0.9318099819902742	1.0332283095824903	1.193034963455806	0.932074440707315	0.556533815514191	0.757680851455232	0.22017086001331476	0.8288797680891393	0.7883185947670343	0.7739526796861341	0.5261562174445873	1.4157044385169382	1.4517977353712912	1.0097226239385264	0.693895429593282	1.2274711702125363	1.428985326535867	1.494726855894747	0.9101083215188007	1.213257232866848	1.0751348886654497	0.9648548387708259	0.9240544142850505	0.5638522425245258	0.7489947325623794	0.8857524678667741	0.8438626192020688	0.49450584437752665	0.8603817072492952	0.4831050620712104	0.8803423731967225	0.9877822496993153	0.7838377731260409	0.7511260676711026	0.7080517644143318	0.6201105124360393	0.6590280623368812	0.8454173258184646	1.559706842003401	0.6715321533253147	1.0016184794263183	0.8438993047615369	0.7138347472713105
EPI_ISL_31743	0.7925914782074981	1.0675557956721156	0.6185620862760832	0.7014923213094832	0.979513256353992	0.3342748008356775	0.5619799126936318	0.8385024351451128	0.12059625285311892	0.41353879809080485	0.9970376095378156	0.44904474644112413	0.8282595976321971	0.770570080720131	0.6028001551596808	0.9583521389551972	0.8596727918639293	1.4280069041192367	1.498112430430051	1.573271357709587	1.0666201801034574	1.5729425865254867	1.595431834412032	1.5545797857617414	1.6227806381219976	0.950161544658002	0.8167304216872193	0.5364447514001943	0.19683280313654894	0.7552827273018334	0.8967553068686835	0.5858302069977528	0.5954744723846574	0.5654680912984702	0.43297031543981657	0.3185306891219104	0.22038910808787626	0.3351820161524178	0.1150310921184281	0.4509196183459472	0.403808790317405	0.9097907388441425	0.552499537877789	0.738388792041148	0.9816428469818441	0.7536321881464485	0.6263966953006267	0.657618889550086	0.7197475462882827
EPI_ISL_17468386	1.5244700358808874	1.473948757485536	1.4232206051177108	1.1973119778225683	1.6456048486354602	1.5389935953814469	1.4269370320616295	1.501291796998737	1.1666864428672652	0.8973372371356034	1.5285000159256166	1.2136247109045089	1.573548541271828	0.8554215000590326	0.863713458187826	1.5687905223671912	1.712170918057503	0.1692878411597717	0.15512482893951363	0.808326747284401	0.7910955707898795	0.4071552530755095	0.2967470694174592	0.21326429834157445	0.6396919315453398	1.3877924819380405	1.556075767754129	1.5606220387261962	1.5715269572982462	1.696312594810173	1.5981485081311089	1.6626888682192296	1.7412027657299658	1.8285987171906601	1.7808641073905034	1.5845508137889481	1.5852352012549868	1.442343818276625	1.412775164270521	1.2386567362372727	1.4974015733574868	1.728360300535328	1.7277051593516952	1.7124017342454843	0.7277942637191535	1.1213279052164011	1.6106836643025897	1.767380722947157	1.5253335552826854
EPI_ISL_165438	0.6668957872677268	0.9678396384128567	0.5865248803809007	1.0090673704407955	0.8310141129050193	0.7048332414252034	0.6726178320178531	0.9044501609905565	0.7058570827204289	0.561696922604902	0.5163776560415785	0.8236757766888925	0.38670069759932535	0.5316821087768577	0.30875228219449147	0.6618336514617712	0.46468095046942204	1.4488031199445894	1.585876910481339	1.5214020667169614	1.0277097432964275	1.4586241585144841	1.575359385581541	1.4704534047575188	1.4694365288279874	0.9776634393771363	0.77760281778135	0.6206002761249303	0.7435590294473553	0.3265442239879106	0.9576898199189819	0.9555356575601467	0.7379295666811718	0.7153510406228814	0.43729616103792923	0.4751596913249658	0.7596339415260127	0.963859601368912	0.6424761485525843	0.8107326365140088	0.8173477457803839	0.8449396790554378	0.4188804813211421	0.8034524785933761	1.2471327148275066	0.500216939465405	0.5994267173369632	0.7164700222357752	0.41159207939654685
EPI_ISL_73313	0.5544737627416421	0.9208165939179559	0.41034714751200374	0.7115890141436657	0.694616194342935	0.3434628817044417	0.31096331271066635	0.5527538961283289	0.7025695474551952	0.6622097506644129	0.8721770259647788	1.0522445663433642	0.6039038586090006	0.8646219988079085	0.6321890876300802	0.7377356999384922	0.6530239315046827	1.3629494589944737	1.4804430398648156	1.6306381862598225	1.0419521949672743	1.4922341084665343	1.4609523868823384	1.5078107366914	1.7027180579628243	0.7818508856991094	0.5796007623898066	0.5889651423073616	0.6841592227030214	0.5797704105500782	0.6301254469367863	0.42437451885581834	0.5143003724078888	0.5397584512616254	0.3122989959399666	0.6429963514604947	0.5104260470270169	0.9027027537400811	0.5300161111995159	1.0517182919886403	0.7431298662594534	0.8894882781600789	0.45696480147441887	0.6938269496742098	0.8279540536341752	0.7974561025847167	0.5228356637010567	0.5017101310735893	0.48594460345783264
EPI_ISL_73312	0.8208321348012976	1.4817927933941568	0.46975985679482646	0.5949436168201914	1.1490902203299196	0.49747248556861934	0.6572149176424531	1.129667233821337	0.434377377345324	0.3665902086655429	1.1716158286166398	0.847901322857024	0.9840899492997911	0.7194738932776291	0.47069681231200644	1.2034455792596062	1.0608075875767813	0.9962380647507624	1.1457977050726227	1.6159373544519124	1.1180929309610546	1.2576860994045629	1.2017481628318918	1.1311844394532158	1.5823606952804474	0.940646765001938	0.8249058487716175	0.6986731141084842	0.6998252978025296	0.8085967616675453	1.2968915564797179	0.884168764500588	1.0577877084540552	1.1017568704131233	0.6416167318959531	0.6189128833128456	0.49992903153117574	0.8138947468540737	0.457498410285334	0.8705375133201501	0.7917991830696487	1.3532093791094593	0.7418081058464878	1.0785078213963875	0.6555840731292818	0.7918871980967362	0.8168614046094307	0.8278296510879324	0.7985957645971162
EPI_ISL_73305	0.7034954873777552	0.5435584896712502	0.7857828093800685	0.768338703172368	0.5169869171918408	0.7722489485612765	0.6881602617487874	0.5196643495169616	1.0527601503511583	1.322999339413229	0.9751437485099228	1.0308041348411905	1.0078493640456232	1.4324669394385672	1.476953591121192	0.6153019793368971	0.8478247313883599	1.379082496033922	1.3267448437726503	1.0353656928282917	1.0794497408384038	1.339807567948617	1.1960151160117054	1.4587976950527874	1.1283914579856393	0.4874149164518402	0.5521324550130673	0.7109995065193151	0.7419634987487465	0.8861919974665561	0.4243944970905068	0.3407948717120407	0.4921492480151145	0.5498072202968945	0.6036815711942405	1.0906705975590316	0.7451621161332642	0.7314709139491095	0.8478750395177396	1.0255677092447941	0.7958670825689307	0.5678225954768961	0.688559196556739	0.5094479016806972	0.8274069450136474	1.1623073771499857	0.5455330585241815	0.4809232165160019	0.727072763670046
EPI_ISL_73303	0.40149749908257126	0.7056939557456333	0.31420611923072006	0.6586350833486183	0.476197839580065	0.4436898970471953	0.3578821909933909	0.6004579599016371	0.5680703280649431	0.7222137806476749	0.8548400785070036	1.0002552301520493	0.9213291041285958	1.0109742314934722	0.7818971721987107	0.5567732351799716	0.8560667733506411	1.4118961801766732	1.524657164566987	1.578693746887499	0.989938252436468	1.6152036793024522	1.4315156994915172	1.6183093665835349	1.761226541005529	0.5070349439341746	0.3850652816933673	0.27138562583762005	0.4614434743221273	0.7257119487989454	0.7248179691809196	0.42888627311678185	0.45850283016674354	0.6017399554453223	0.3008946414596413	0.7598228959004052	0.5104482326339013	0.6760213797664756	0.49478405790026336	0.9809152877373359	0.828835966023975	0.7691138932905254	0.5106138393261991	0.3758197514615935	0.829691174567049	0.780883843450874	0.25609420738630384	0.2916693281179762	0.37415925000855765
EPI_ISL_174484	0.36788068591553846	0.748030480374061	0.27428830550959515	0.559827645933562	0.41132082324823727	0.40411660146561323	0.4382074108061458	0.6519871484592468	0.6348669967252962	0.8666314100961588	0.8372665972774858	1.0921367104813953	0.8532980876246788	1.1803461121608518	0.9629622579987709	0.5512134753709566	0.8338781606310176	1.4332802627443346	1.5304510856753282	1.5524438559152403	1.2016368423584107	1.4982772225531231	1.3830202252431303	1.587902417108757	1.6890843750296618	0.3674466239972827	0.25722690038546825	0.33190397701454555	0.5476767059102432	0.6006928529020901	0.7689944058369769	0.36770613718873135	0.49948891082639457	0.6494109211627924	0.19300643505225312	0.7790521206050318	0.44487455415402155	0.7120261873156623	0.575253081361668	1.0873243622934579	0.8198602961151864	0.7725267768988824	0.4406616408987649	0.40390464802312864	0.6834732788206113	0.9908598573215005	0.2407908469651321	0.23610721982693872	0.41802606026717315
EPI_ISL_19156871	0.7587291280574462	0.9787925646073001	0.685755294779121	0.5480860230916346	0.4926745480632888	1.0329693619728495	1.0407849004324243	0.796075973988429	0.9844815277725767	1.1550718543522365	0.839502863218752	1.2392087876960038	0.8337828753333267	1.0475282520497575	1.1595162459702173	0.6210519257306384	0.6900117205483267	1.269375320514867	1.3737130800298074	1.1956302934129117	1.1378277526777203	1.2242263566871494	1.1451803031287306	1.1236134001939326	1.2498546381326963	0.5155435842103926	0.5160151793965996	0.6201474583969745	0.9578397073957651	0.6462420360956878	0.9007809593424613	0.8914280228363272	0.8683826031904294	0.8992455768232782	0.5326466872787137	1.0609480195888952	0.9657179416200382	0.9837788997873623	1.1147282171962307	1.2394162994064988	1.2045878761120525	0.7306596738617279	0.5930551139007487	0.5909749430132667	0.9228655166871665	0.8755329633962925	0.4696911376541929	0.5706055720441046	0.6660838712375323
EPI_ISL_154130	0.5434446517105771	0.5885278612231177	0.5527014637608063	1.2635742643781467	0.44827608631174876	0.9788754294863303	0.8457961030748364	0.9293111777357725	1.1136655258400883	1.174491175213955	0.36532696139003795	1.1971192585422779	0.590249921455582	0.9113030088296863	0.7709095950988332	0.32098539851351215	0.47023275838251977	1.5979200283316688	1.616375151891691	1.250166815726561	1.063001660562413	1.5028872082665166	1.4342444580650526	1.4679593348377777	1.2975336934936643	0.453888331421926	0.4569930447142784	0.47226418834493844	0.9056957422930146	0.2807972939154706	0.941895503107608	0.9023689919446594	0.5858115810647742	0.8380227091290045	0.3622996548018437	0.9351074091231235	1.00134214263133	1.098206438515974	1.0651106915376516	1.1834676752261575	1.1133693333413437	0.5887047947187205	0.3564983915721588	0.5045739465770749	1.082684946763328	0.5788808217873012	0.350095	0.5408898324594595	0.274516599240499
EPI_ISL_166659	0.28315707004437873	0.7040982310948447	0.17408838414971506	0.6478174600641917	0.33876221072274304	0.6186225244369536	0.5188184251581438	0.7644221865728471	0.963050356033163	1.0046603977381594	0.6529071443106806	1.268455338788642	0.8254579303460831	1.1624958198211974	0.9236785983138871	0.4127590411174564	0.7541431402783634	1.437556724217603	1.4925382659182622	1.47996468938035	1.194421212239163	1.3757777402258964	1.415422317475088	1.5283829346753972	1.5688841309535735	0.2613400157340008	0.16207932392190882	0.32697177487020246	0.8180891449559193	0.4566176943213883	0.8903220636701186	0.5400595034124023	0.6000211283947663	0.8043553041484557	0.22572353814147528	0.9198525397642291	0.7048137340268918	0.967897361301354	0.8736209082205975	1.2574021924961203	1.0485294089699806	0.73159123034913	0.39834581368183264	0.3421578501537098	0.7059669027552473	0.9761431655369893	0.1829423402854865	0.18937283868250288	0.23542484079467707
EPI_ISL_68082	0.27464144033413307	0.73524548754996	0.2638204116052346	0.7227714789245161	0.40251040378762293	0.4909017328183498	0.4319086048242332	0.7287096499729426	0.7622531188723157	0.7796123381206743	0.5559169510160704	0.9431247963959799	0.5835979033626735	1.0386103592601201	0.7602765962459112	0.4898661115188082	0.7584091216944874	1.4789370633893786	1.5870640689088822	1.506161217874424	1.0515693672351512	1.7215520318892048	1.5273376970596582	1.6350221463839365	1.566630625467547	0.455472927371244	0.27748739720759497	0.2824200370920731	0.6193907444703443	0.4313265752996651	0.770169290783518	0.4849166321605508	0.500986262732423	0.6400984409673424	0.2904203336377943	0.6984266281667024	0.5209116020797637	0.8617021280322305	0.6133232425014294	0.9230845411333317	0.7305888952664743	0.6898808847874958	0.21273813185970158	0.4257542470381098	0.811933610133987	0.8245363317606316	0.23558528598591333	0.24285848906672902	0.2095691867033812
EPI_ISL_4138	0.23162643217571877	0.5169858049164704	0.311476022896356	0.9577199440158446	0.2044039112383127	0.6823706144811585	0.5772201139938214	0.7435803477524789	1.104761619570141	0.9961273579572829	0.3962327243385605	1.1571437965643596	0.5568404164115148	0.8463426927635909	0.8190478927463769	0.3289213236499493	0.42929804177206554	1.654041190442363	1.719720588634556	1.464287650976162	0.9683152463141098	1.5893476514389189	1.5548408905027338	1.6888054545376323	1.4727325261540658	0.3587817258436721	0.25949266794275794	0.2920987059661856	0.6973002021603164	0.275040425226449	0.7703339621984016	0.6093382334211301	0.476549412395481	0.5994487928944234	0.30040019647797955	0.7390418239774549	0.7484813423854093	0.9687834135086892	0.8478530491764018	1.1319307373062655	0.8787137054642866	0.5173091562368187	0.30417489023308697	0.2980901612450986	1.0549605974028176	0.47244210378674745	0.30816703751193464	0.21642021931410682	0.16953009123035334
EPI_ISL_65327	0.563437013939084	0.9264530498452639	0.5713147426458054	0.6191811254616926	0.701401528513284	0.26618206223654284	0.5951476516247667	0.7252048759893283	0.41792365416277777	0.7444837895039986	1.0198551650750909	0.636337290332264	0.9072463902879487	1.0186277809876403	1.060209885930186	1.0485566228017589	0.8703505814049693	1.4097056943570752	1.4027426632430195	1.452686899799396	1.2011434729597745	1.4679444464837133	1.473314914385672	1.454932381091127	1.4544891837352671	0.7202300674355405	0.5901861973182616	0.5254787205401111	0.27842393502737484	0.7839404082514225	0.8091177102204778	0.42080988810492104	0.5228695293763691	0.5294247945300014	0.5262786913731834	0.47584992190920317	0.17768402662112792	0.3954914915079094	0.32961484293456567	0.6394639400822721	0.3847032919845106	0.7944057203962198	0.5460478410556855	0.631626231422822	0.7360521741502197	0.9580013485191253	0.7461346637750872	0.4693458557544621	0.8096123506993735
EPI_ISL_10333	0.8034910347840332	1.1573519713549323	0.6836494922731149	0.6896020203417064	1.021050389945946	0.37340225439057395	0.5890654258494628	0.8899340242079108	0.2355112299280303	0.3303207382969163	0.9886022339907324	0.311996603034725	0.7667174454993197	0.665020042373079	0.6173526596993155	1.0350656445093795	0.8107837001778194	1.4397566095521381	1.5181368306351652	1.4640377509475944	1.0793124328540433	1.5793106614804575	1.627862533748094	1.5877134724588873	1.5137065937264462	1.0794014805150447	0.9265850172209268	0.6342244527132306	0.20615670378074635	0.7308783838843703	0.8685262020018939	0.537478080069149	0.7103027533615148	0.48915553840849446	0.5557665771135769	0.20412202133048973	0.2099248747619129	0.34142296723860033	0.048127956310442754	0.3174632825010668	0.25439600867818724	0.9371471442769976	0.603657972630636	0.8476835351590815	1.1386410443202903	0.6516545767307307	0.7735165032163528	0.6705916527035123	0.7633862495062202
EPI_ISL_76976	0.435413930383275	0.9563956597024077	0.33322340048473875	0.7516824428279314	0.6823949632909994	0.3300524420340456	0.25736399339570226	0.733136713432086	0.6087691599435344	0.5627856940901512	1.0060310995552295	1.1187960540616644	0.9836502408769249	0.9016785860556125	0.6265977247894088	0.8552939456787472	1.0535453542517252	1.1440301777912636	1.289610310671264	1.6709065738326183	1.041691358468355	1.4764471739529423	1.256405360135732	1.3695078344680618	1.8020208914537972	0.7045612127182586	0.5110217052140535	0.49856956545113496	0.6635205095636465	0.8267393149368754	0.9435991675768173	0.4702501994077559	0.6774897438581101	0.8153664374309385	0.4659090277705038	0.8096843435830469	0.5243113627212888	0.9202247128530567	0.5089381496614376	1.1122245950957477	0.8560272200754127	1.1474947554982293	0.6562906060328659	0.7019652405098306	0.5840311429709351	0.8625333238130222	0.48631543450197456	0.48402735469806313	0.5123848840372056
EPI_ISL_76973	0.5929650302423316	0.7282666240698072	0.6525981425201292	0.7966462234363874	0.6292170014674151	0.40241058798551144	0.3836771350289788	0.36308493147964715	0.6938638111637903	0.8942191000477403	0.8234055148123437	1.018496005433882	0.8298371808695931	0.9564748938296055	0.9209004536285167	0.6467513094554302	0.5498198277622579	1.4839393299641657	1.5655628252538074	1.448433610683667	1.2224952988357727	1.5597404367025072	1.4363853236700952	1.5085646541618793	1.633706053712051	0.7397049605935293	0.6153972088239937	0.6939122292101435	0.499233034952973	0.591502153914932	0.4906711094029048	0.15714038286511534	0.33849121731181897	0.3774705322695915	0.34747255475348626	0.7661218882807732	0.48234875945779554	0.7620000585757714	0.536808032596231	1.0320689683654274	0.7737171492200992	0.8764153788086585	0.5369411171959773	0.7414279822833507	0.9276909598079935	0.7879477660006016	0.5988296901908035	0.5523251353114154	0.6150479161885947
EPI_ISL_76967	0.5545145346356928	0.8190464175725802	0.5941776151005453	0.893037086129702	0.7218007505131597	0.28825136692020836	0.2940132938453579	0.4837003170823442	0.563395307062417	0.6724252686044068	0.823217691883018	0.8746980382081854	0.751136842126974	0.8513948601843438	0.7139552446423185	0.7639916908578143	0.6563659704552792	1.4675732836511235	1.5641277637365687	1.5570084804421795	1.186452528614095	1.591337708621713	1.5348246867207886	1.5545990787711639	1.714267926114295	0.8881832977108594	0.6838534281269466	0.6539630075444993	0.47894154227129715	0.610939511817647	0.599638356088477	0.2173120695741414	0.40224428168035	0.37444618948976116	0.3504168084622068	0.5824680157852677	0.3908512263239149	0.748545028036823	0.3718907367680021	0.8810520542603405	0.6262749332210016	0.9326972062638922	0.5239344818082696	0.7780822061351882	0.9232050899518057	0.7968101961674501	0.5984546563372003	0.5488845494167722	0.5761507722669843
EPI_ISL_243347	0.7269896288817981	0.7995115959669671	0.6485246737870753	1.1537180669790534	0.8909968464845214	0.8028336488039616	0.8593001637998878	1.1276478276630797	0.6732086005237317	0.7963924668691935	0.9104136861365955	1.0467688111777753	1.1545465991771224	0.914651204280162	0.6087887767070441	0.8717913741516836	1.1088394613241062	1.1487889401008808	1.1338941662973983	1.403685936418458	0.7380330621538223	1.2203460464288733	1.1273968052416867	1.2639026936998174	1.4214839356879452	0.690352148275821	0.7810983386535479	0.6187018910441753	0.6685377609328826	0.9384751933408634	1.2231129909450755	1.0355959391771299	0.8180353494237964	1.1368623551155188	0.7277671275808126	0.9556584212438148	0.7827774384539588	0.8434010796733589	0.7511026909255826	1.0529138925873167	1.0335725953745993	1.0512903282054868	0.8675555275208845	0.795124382255079	0.9073575476771797	0.7386072890445602	0.7925558093087278	0.8704254390050343	0.6800408736293944
EPI_ISL_221726	1.2122160203780739	1.4545984958503053	1.038588023657225	1.1511948475609706	1.3170723429204918	0.9665106741222779	0.9166807397131481	1.1795201805073416	0.9200085530348179	0.45628652947040405	1.1558567785616916	0.9459944455708953	0.9338287361931203	0.07156149984507576	0.4654514698738481	1.2014687760921339	0.7501452599160761	0.9331921496132011	1.088671619722722	1.3038343216242596	1.0607258831380906	1.0354805929211706	1.1461702861891145	0.8390733212137282	1.2188069054545614	1.315707500967541	1.2401978312717705	1.1175413944159391	1.0432448302198296	0.8235287531258892	1.2999892719583983	1.1805495083747637	1.1760832848881235	1.08899487137764	1.0816596688336362	0.758633287047672	1.09552550287153	1.1894611754416737	0.8767178639724351	0.9498427776827016	0.9101498844954323	1.331658552629467	1.0713400746545334	1.381615503226125	1.0712402819920568	0.22311940290498067	1.152364204843104	1.2420560701011905	1.0972576684606887
EPI_ISL_190517	0.5503367691632934	0.6670825245708929	0.6405882791096813	0.8124302201253666	0.6733862150852903	0.30458131986130754	0.28663747339054446	0.3790775558088775	0.7188889702095121	0.8306347153206242	0.8713728753623489	1.0032322330832286	0.8980996547293078	1.0711330575211047	0.922948515817282	0.7123428624628142	0.7618556124416728	1.381253589996637	1.4229869482528097	1.340229098123968	1.058720379140563	1.513485670706009	1.4000828859957826	1.5119326181271542	1.6278221466794727	0.8053736028623484	0.6450803375704448	0.7191667805693541	0.4946399839548896	0.7563255980635296	0.45172107486707047	0.1082591861060328	0.3408650219770136	0.38567094865497287	0.4657766143727825	0.7570619426436593	0.4177476668078123	0.7788010020941946	0.5067244929933832	1.0077607649110618	0.6874308425148091	0.8960538621766693	0.6204477120570838	0.717617374058076	0.9371077401470267	0.9698924704395298	0.6663687535163167	0.5481020088060051	0.656577682587455
EPI_ISL_15878542	1.5516929925308047	1.538292773609089	1.466151267475531	1.1906595458157243	1.7096091168134344	1.5560343660099285	1.3708459945370262	1.4811888863394078	1.2416784964274594	0.841465613427851	1.5756626913306175	1.1850676940622231	1.5695386741329038	0.8454061000996148	0.851465179647473	1.6192711086007434	1.748191296214387	0.10966732106949595	0.10365893125757386	0.6767836553548989	0.8411050677185342	0.3519030227993928	0.2625773182801524	0.1870674579631738	0.6481853873893041	1.534611412555913	1.6542004408799076	1.6584801983268296	1.6296935520477853	1.7727849451828357	1.5523140077877904	1.60452263261531	1.8095823415160135	1.7751974497391774	1.8662390157394126	1.5698281564520418	1.6264396817036104	1.4986031471172654	1.3909011222703849	1.2099177648070212	1.4821223860808594	1.7966341194542164	1.8371988183706924	1.7973921164431332	0.8643320952855874	1.173512049484685	1.6894866649990656	1.790579405700637	1.5564183225208703
EPI_ISL_393329	0.9544208217997838	1.2034429270196416	0.8434476721771907	1.2042216646692567	1.0485295543084168	0.7380968125610534	0.8104683153479579	1.015490113116392	0.7786003557618697	0.6428127773935612	0.8070141924867111	0.981349716586049	0.5921376650335153	0.3650713841010583	0.4517534789912906	0.9365262991393237	0.5997461110388258	1.3083830385320203	1.3640131427287456	1.3742951667636922	1.0978471522182802	1.3317036209362374	1.482241310087034	1.0866743604117193	1.4017614360101978	1.0719962908331855	0.951325700105269	0.9459872151788729	0.8974039766377852	0.49327369020167977	1.130670337750012	0.9358422367674532	0.8434675646688676	0.8714714968867658	0.6238189730875772	0.6627018441685307	0.8074949548531231	1.1306920465214818	0.7949927685684032	0.9966605072160829	0.8434184067279917	1.0947912811693141	0.5747821451576127	1.1276621020065427	1.0279679471201284	0.4987265295124014	0.8740028009528553	1.0165051235668607	0.7573472080940719
EPI_ISL_221722	1.0959294097953294	0.7070960379188196	1.1804017693171622	0.7868213491170162	0.7804503864235321	1.0541575282117333	1.3310285659711827	0.8501192047403383	0.8145216536515635	1.3824327183955885	0.8351946774340951	0.5215635332646774	0.7929782033831394	1.383076499093245	1.581097112214112	0.7824581165394956	0.7591816000095998	1.502713810279606	1.3194511983832622	0.6864361492836234	0.9847502382226155	1.2044589893247755	1.4193552131750462	1.3341251569053485	0.6229484838412493	0.7793609175953561	0.8939736314821759	0.8468105766818188	0.5780166777910183	0.8703998000343058	0.5976922650908236	0.8245737563430023	0.6622923765234874	0.5414619936188899	0.8102018529456	0.7290278958989093	0.6860062797069557	0.386107806699279	0.8643240555506082	0.5164367749100893	0.5658788857459918	0.30155101750151536	0.6754581139258526	0.5701423182990065	1.276778775903069	1.2469068662190654	0.8304517822625455	0.7666260888116999	1.0681082608606074
EPI_ISL_18102701	1.5645926439202538	1.4184766177725665	1.5306994951587474	1.3285191069805595	1.5880215612870803	1.3896638243437813	1.4485680718010938	1.4143533957822663	0.9145093128383639	0.9218532325261619	1.4825787122343685	1.043205907695104	1.46324854781371	0.8179903617532127	0.9276155128684718	1.5666573530639776	1.519108300694149	0.45754797059562424	0.41402191758287543	0.5889344589509765	1.011480714553753	0.557788417726113	0.4946868424055213	0.27220492793958817	0.808470957909937	1.480147504654306	1.5790894473460637	1.4778814787150654	1.279520197138247	1.5896238737228898	1.5201883473968734	1.5710766142051238	1.5164259235900248	1.5539074964164468	1.609299063752291	1.3209055917821182	1.3642543188580807	1.1997547691259551	1.240662913011239	1.0631857555297384	1.3002705810268427	1.5213351150276695	1.6379069542634113	1.5975954070810987	1.0503271370052876	1.132720013730253	1.5537867109320596	1.7059814928661157	1.6174321178561568
EPI_ISL_144532	0.9508354393341256	0.7387342173235576	1.0260944071914577	0.9324704761687895	0.7428624745242401	0.8923045025539206	0.7536959161138579	0.47810585197415834	0.9390142829400115	1.1726912408528318	1.0622512631816603	1.009239541247039	1.0478847608941224	1.200751451299881	1.2266521297555373	0.7785251515440673	0.8886394021562488	1.3131039824127833	1.2325169668190592	0.9670335513945587	0.9948776687745055	1.3269491128605786	1.230824039667124	1.2667510251985008	1.2262286928285386	0.8535091900040783	0.9206042752910901	0.9602061460035487	0.8082531747267334	1.0775646516015145	0.42496886527010924	0.4365257688994313	0.6495590568979956	0.541951730977609	0.691659985712491	1.1081142125506518	0.8608211544416642	0.8356228405161501	0.8127525056107621	1.020104456258567	0.8661707132970449	0.802549276597463	0.9227437712462161	0.8200115382207251	1.1134798917712991	1.1169425834678914	0.759746689770983	0.7869189411296567	0.8655016797304245
EPI_ISL_244744	0.8605206763353181	0.9618962905849207	0.9064560354824482	0.8759464346710564	0.9524853149964813	0.9230776813449211	0.7071833342148031	0.6674551758566734	0.8556829454845231	0.7105725906142861	1.1019776756050275	0.8094528965678554	0.9504151686311895	0.7869164166433393	0.751441678493904	0.9570457284405622	0.9326426883268158	1.2246579949352165	1.2074699149996668	1.2205750887134679	0.7963241396093252	1.2706565078006034	1.370333744902334	1.353302611884354	1.3563487406106776	1.1149388388839276	1.1150256077304397	0.9944625262883929	0.7731428428073102	1.097529732659307	0.655931051815879	0.5567213736118538	0.902884017331303	0.5649871065284129	0.8350780710934	0.8922303072894677	0.8495906064690605	0.8547678447514822	0.554745620199017	0.8342924434656127	0.8633840404253037	1.0666401450081735	0.9960109533368737	1.0140115092807847	1.307084983003057	0.7859460966472103	0.9892968739110611	0.8598210164013418	0.718080786158533
EPI_ISL_16632542	1.5904734594255092	1.4289211809680067	1.5534426047590677	1.1397858517044688	1.6380476224875813	1.6026039846337594	1.474820149145578	1.4469859329036985	1.2394098813889276	0.9776776921809758	1.5948653530225816	1.0488304962107264	1.5724481408873308	0.9692968116783499	1.0891517375291402	1.6036211842601769	1.6961380990170551	0.174492182004523	0.14660677175819903	0.5750943187223083	0.8991178353267816	0.35349037575427733	0.21918441512176856	0.25890325235008216	0.470162210767208	1.4719518802584557	1.6335662420608352	1.6091953083036494	1.5278209951804866	1.7959667539293815	1.439173891494375	1.6208015297078968	1.7428991803108262	1.6967254627044492	1.9044378569723468	1.5370317213004172	1.6080554479372942	1.3097626536885527	1.379581944992486	1.063206697522022	1.3555441031759257	1.5942099974654396	1.8416554238937377	1.6764187864847702	0.8911113266092424	1.1996393954529858	1.6784115797302777	1.7366622327373107	1.6425494350885694
EPI_ISL_221723	1.4215143471604306	1.3192376853382213	1.4397126277315908	1.3497820927270425	1.5224277639443027	1.3448825907401845	1.2851844369981966	1.3430174105361616	1.2665779307547844	0.9421038317606238	1.3474578077756931	1.2285545033456469	1.2350662480623549	0.9014389899660111	0.8564718155522056	1.4788637921946366	1.4970204988631997	0.4764741725679693	0.39478429476622645	0.6210025786870399	0.6575893106828683	0.4137095840404199	0.6447379602309145	0.4155431242472163	0.8111822030643803	1.5787518898212256	1.6046158470075471	1.6430693301026449	1.521738875035924	1.5604880360129183	1.331896967886329	1.3707314625133822	1.5404964777999186	1.3686563082592482	1.601910808750894	1.290701380923669	1.3929154548876792	1.4700070453380554	1.3092637707929087	1.255828932220344	1.3450820275850093	1.4944896679465163	1.6162584942988087	1.5631050516596425	1.1920940772064101	1.2885959427882605	1.6176348464902133	1.6191442305084842	1.4442682183722364
EPI_ISL_16837243	0.5845368405702089	1.0711629747436715	0.4564053224170408	0.5914372463049027	0.727968133091192	0.6242754548582032	0.45206977692290695	0.7899510866074555	0.7278195482384964	0.582699006620464	1.103135618887753	1.0742048479194153	1.0773957863069463	0.8763751542208482	0.7113907443080607	0.8296107538132713	1.1514377990873677	1.0786039569666601	1.1664753640236194	1.5127970883645099	1.0832810583823362	1.3509189226998672	1.2036361451401587	1.3058000329493478	1.655061469863439	0.680215364009445	0.6037442950017614	0.6869081919189725	0.7808868497524492	0.956682142396691	0.9535954837493386	0.5187610286733664	0.9276861371640653	0.9217641929227984	0.5633591075576849	0.9842765955478735	0.7135399362782195	0.9558371297255884	0.5859562930680513	1.0829718465989369	0.9044879818932428	1.25318065412077	0.8103398673048077	0.834143531711291	0.7177931787950296	0.8913979920213608	0.5546572786754782	0.572778219005147	0.5165542588083933
EPI_ISL_1254	0.43249783463499103	0.6244208602929224	0.3386008104682252	0.8255215380243419	0.4112844508089363	0.7767392359822975	0.6939447025086141	0.9026660050143088	0.9986060763434792	1.135342020336588	0.8802848883240337	1.2348493477813367	1.0027375532924394	1.157540642583424	1.1577212847185157	0.5628370262118091	0.9803263829747656	1.1960657966280768	1.213981369328984	1.2519683512491888	1.2097458274308652	1.2937332659164498	1.1239844309980798	1.2881978085208883	1.2609353915012633	0.2232229583136588	0.19413829903378677	0.23654590061429603	0.8570561699290671	0.7636765641428371	1.006806110097609	0.8758096658943183	0.5959046867816643	1.031359869089598	0.5787014809337094	1.107925376657588	0.9133124572890992	0.9097631809944156	1.0907937254001334	1.1893036670024666	1.0376132277534036	0.6126001301053601	0.6006666908395685	0.3055960987217651	0.508685222417192	0.9139858255966306	0.30107140540537525	0.3200787401075148	0.5402487771431829
EPI_ISL_132309	0.33700040202835335	0.9468848679404143	0.12201210987155875	0.5494748972595753	0.5076924325759293	0.5032440086045296	0.5141096875534508	0.8365972495945402	0.588054780840022	0.6508367849584804	0.8724815335042444	1.059609934611917	0.7647207184931447	0.8413029427812205	0.6359288268078195	0.7301674085812845	0.8261307590486038	1.284708308145024	1.4199782757385728	1.7655122127988234	1.1309451207609762	1.411302065007852	1.399068289349438	1.42346110061025	1.7097598730614099	0.4651319363589568	0.2817639290276507	0.16567780985453273	0.6572851048448813	0.612020376525191	1.0702708635054783	0.8499177803387588	0.6618858041261477	0.8727183061992958	0.32635426371477294	0.711495374374759	0.6171462182208044	0.7963947884309359	0.6604516214711454	1.0346132916993354	0.9507873589609822	0.8036365236534535	0.4224530374963208	0.3896902702626298	0.622463938546819	0.7279144381109793	0.3006601614131412	0.27798932660613473	0.3344609476482263
EPI_ISL_2917	0.5529111842554006	0.43581230829015327	0.7947119894917014	0.9551019140586088	0.504125508326506	0.5835746872003819	0.5202860278115482	0.336141744783531	0.9199351648485679	1.0894475815215943	0.5842246382842048	0.7429712139319926	0.4994846001839357	1.1407084973324708	1.1156180473268624	0.5045777913219922	0.4349538453546409	1.705828661059137	1.6976225542016614	1.1213453570950658	1.0139331550538346	1.6252196326912782	1.6419829988451466	1.7592248817839744	1.2825353910668145	0.814891473830907	0.6810127941923477	0.6507601143567883	0.5126143092521954	0.547277560103169	0.19114271257513538	0.18608275089701454	0.22485849179104866	0.06559807649073424	0.44826678374098383	0.6162032436914298	0.5398751525523744	0.6669179513941242	0.5709260601404628	0.7316691981720207	0.5569364552741269	0.38687239975499643	0.4015683996979891	0.5059265883773655	1.3143996577499695	0.8923909388284629	0.5937985344719059	0.4286740971617794	0.5238847238633922
EPI_ISL_17699034	1.5190746989530703	1.2626991171401944	1.4314662519888421	1.1027294076101648	1.2759684443461294	1.5579188441436371	1.5296702152155128	1.2869235921387665	1.2063765108253512	1.3180681250442572	1.4277914040872826	1.2180043573341437	1.5513982967344058	1.0605014017122485	1.3782919089024679	1.2574816549655108	1.4895598632765152	0.5067723489821193	0.36152150760900803	0.5788399196722374	1.1641034425526469	0.6016767502586313	0.44986967491735697	0.3086679987077008	0.5625346497130823	0.983106306782698	1.2363423127519388	1.3770768127475876	1.4003759216045228	1.5533116458243028	1.3451611029695179	1.4278641483398233	1.4107038331520434	1.612382807165189	1.4985213038546068	1.6659419347730688	1.5210932744434458	1.226184028218847	1.539469024210313	1.2353016447137597	1.3559547392458873	1.3237332073588646	1.4892802127741456	1.3706132412559244	0.6789240211238399	1.1767594521530151	1.3020572510769866	1.498120500591145	1.4712487485540855
EPI_ISL_103200	0.6711270322468921	0.3875481340346588	0.9759323095582494	1.185470070311216	0.4646839480511228	1.0687046745504871	1.0458809962232118	0.7860378675111048	1.2269944154762054	1.3654789048046583	0.15190064757293986	0.8587850918715726	0.5271789731388594	1.2208009252656906	1.1849813925067816	0.25037522493302655	0.4552381903219832	1.6944352555267619	1.598114861923074	0.8003776199307655	1.0231418464612285	1.3690190193498797	1.5357079932717583	1.5989621564365888	0.8477958431524899	0.7117987677963977	0.7068294871859238	0.81123040015504	0.7837390583209981	0.3762243128877658	0.5649845312323951	0.6255438258081911	0.5636519198788386	0.4670199200329287	0.5645372746445387	0.7703203743759583	0.8918422902713754	0.898506767382124	1.0333406121346083	0.8484686771604005	0.8067676324921027	0.399568040311555	0.5022625161136726	0.5686728442154284	1.545852541713165	0.9691885865892227	0.6094373088704976	0.6148929432681403	0.5206508718931193
EPI_ISL_105043	0.7377797148692384	0.8534182844013846	0.7263251362605154	1.03438465001659	0.620920072582664	0.8739220240919153	0.7997382080032693	0.8053190150431576	0.9140000718683258	0.9050627148486265	0.43452906420929005	0.9518951884068807	0.4612544550920794	0.7060385553478243	0.6493957390763625	0.4266740064338064	0.3384643727595965	1.6564917249640998	1.7321990767055466	1.3058252982166745	1.044611313292754	1.589457979846742	1.5786084542508871	1.5338766419598584	1.4009490163913692	0.759207097079867	0.7148765852881029	0.7272079747511446	0.729888447409381	0.2625425788326232	0.7769196935991911	0.6716348627039153	0.6632854452280674	0.5942990217200648	0.3268761024195357	0.6777111749489337	0.7993899187285464	0.9659320625333014	0.7436171492337472	0.9633434270636915	0.8710668123034858	0.7547679326527077	0.37537328463174335	0.7541884187842222	1.3608489963744161	0.47258555818367554	0.5046542008517058	0.6730788079696914	0.3735718118404885
EPI_ISL_369825	0.8405875070363307	0.9102411500667502	0.8210374519533433	0.5227631277096407	0.7127449999705502	0.8174053708604065	0.9473097867230751	0.7622738015852011	0.782419527095169	0.9958408382892577	0.7995163620236363	0.6217788750059372	0.5380589463117654	1.155022478175294	1.1991481329399978	0.6926028182325388	0.5471117501024972	1.47790379209719	1.5743503215380055	1.0492168889467943	1.0407114883446609	1.366404020175676	1.367887243175951	1.5640654466189372	1.0918764910393823	0.8735774564525561	0.7975883364472799	0.6800307267113306	0.5222394251122622	0.6294536677495374	0.5772230229568281	0.5789691493902329	0.6669299359257443	0.37774270296271406	0.6049385780221337	0.5095071280510927	0.5613879039835324	0.49351818003368186	0.5744207584965544	0.6266748114962754	0.6721164047688273	0.5158006782056335	0.5413539976922563	0.5966169586352198	1.340509977830375	0.8444041994990541	0.7006672284659208	0.5665140045007362	0.7749571334476739
EPI_ISL_206440	1.5198877940188478	1.3603943464795425	1.5355455450904585	1.3141218616951729	1.5611286481114441	1.5223231694981594	1.4422648975519592	1.4473613185754035	1.241807331827307	0.9655574031340571	1.4285672593829524	1.1733070754991697	1.4885250320245864	0.9844977501290945	0.9349469132312984	1.5033919233673592	1.7153985085221297	0.3043609520416425	0.21840845328412462	0.6347551874705994	0.8502379039368386	0.3487202387000833	0.3415332010276583	0.32864095644756564	0.6898297729644914	1.468061409417441	1.61931345337607	1.6737140892482512	1.5674424771297062	1.7083272138987353	1.44795078386267	1.5271681981073582	1.703644673611109	1.6476180320383274	1.7027978761237215	1.5265195833567353	1.5392234779099248	1.4508055144736132	1.3624906362992095	1.20415589071658	1.3812088700044702	1.6369404294368366	1.7301409650617268	1.676544690901149	0.9699131458288995	1.2997857627487843	1.620215059512218	1.7357750608450755	1.4574047547852276
EPI_ISL_78001	0.46548092092206816	0.4955842649523169	0.534415253081887	0.6920490540300459	0.2720519875935299	0.6496708201559014	0.5631684462628461	0.4943980428582714	0.8942032458259893	1.1410143217714874	0.6601154379590446	0.8886612730407499	0.7669576586480096	1.2177263583728302	1.254474689707977	0.37141765916043645	0.6199527322071838	1.6323195908388586	1.612983384542209	1.2583456278284975	1.2061702396463565	1.5596816044993616	1.5085715293563213	1.7191585245030514	1.3340747355667937	0.391202314283179	0.3449367345854125	0.41192099739568644	0.528253141460423	0.6106336896739895	0.44167608499336153	0.3272381103630535	0.38079429917910146	0.3939336996152124	0.3085790220431287	0.7951055234193944	0.6300274758867503	0.6112904634527201	0.6853290455878278	0.8619401104032469	0.6365921348818229	0.4256552524781999	0.4706990720089963	0.27336675212067074	1.01140273286267	0.922986706539222	0.25705860890797116	0.20350349016166458	0.40505242283134457
EPI_ISL_123956	0.3850503290614241	0.45941854625615186	0.4111944081392238	0.8694571453692378	0.1483822637975294	0.8469742541321241	0.7654662025681	0.7674706441667947	1.044163186370215	1.3094939156746375	0.47958496408676865	1.18458	0.704879609133424	1.24307740159263	1.1958178837951843	0.19895280296328155	0.6075372012748415	1.6728205444642832	1.6483611274788306	1.1999432220663373	1.1938153902075095	1.4990072102316305	1.4684683125001643	1.621028322606708	1.3163930922843445	0.16528989590469567	0.171892916833436	0.3153012900788581	0.7396332271186854	0.4092884076128578	0.7579590596158174	0.593257520436061	0.5027390824930058	0.6780903472579033	0.20291349316981966	0.943724855561165	0.811568874608106	0.8416096013179564	0.9798272373758615	1.161831118317495	0.9629474858531685	0.41774723588822216	0.37755322039235606	0.18789899879936245	0.9683679162304385	0.9072385989560955	0.10599839517296017	0.18852448348723472	0.28075274477526413
EPI_ISL_391469	0.31496301201580124	0.4630270939129302	0.44053962951520464	1.0079661634261141	0.2874479809752294	0.6650959553983344	0.6403174417873814	0.6638613961103925	0.9366040367953264	1.0360948661387124	0.2863513499076036	0.987502387895324	0.3653023262178927	0.8962930583152345	0.8184211576323847	0.29796794691634587	0.25674569362964184	1.8183151457338873	1.8751424631143236	1.3922167152554006	1.0789621213158846	1.6063655919371023	1.759349163923254	1.7417946672890507	1.3824056298983738	0.4909039049199554	0.3412143225612896	0.342566282314711	0.6458317434523813	0.11412282566592158	0.6656736987270364	0.6227885015097101	0.3859368272862821	0.4314283063114257	0.1858609182947274	0.5582868274498252	0.6727986143309127	0.8512064678958132	0.7943325358189249	0.9594334272857125	0.7949011682152254	0.3635772430801453	0.2056774429544559	0.3103340645456054	1.21649041297619	0.6622638803463717	0.27414130339843557	0.25724981954072323	0.2562319570256316
EPI_ISL_19094623	1.4503820682008537	0.9647242610014386	1.4947157754133467	1.2422794133551833	1.186601204646389	1.475184902069291	1.6158758659683343	1.2856989084886714	1.1663530189158016	1.5557769725515425	1.3179866811639793	1.138546408841863	1.4695010660997379	1.3955202060097034	1.6005183814212414	1.251927348642635	1.4479286991314175	0.6661959110383218	0.4531995672668152	0.5409059351155932	1.109973990104781	0.46202681977950644	0.5105400368539508	0.47599326349755267	0.377845815313102	0.9613265560624406	1.2159123395449274	1.3373442287900734	1.3207819102228702	1.5190582377946935	1.2479915475582044	1.4484277028249994	1.2779977442289976	1.458879235443413	1.434582657623588	1.510942083446837	1.3892330645456128	1.0226746067624963	1.5164527974369375	1.1449154097178966	1.2427720601387495	1.0237921360166347	1.492098914570007	1.1615730699193592	0.7241700738271202	1.5100020955826363	1.298844116366138	1.408839651879297	1.5770586365774406
EPI_ISL_19151390	1.6180255243806556	1.2133357916062097	1.6557187036402392	1.3328223281635012	1.4922026320906783	1.527167275251359	1.5704880835984392	1.3543362238558	1.4309368433819596	1.4031591881938301	1.266021478057341	0.9958313165623317	1.146644672834678	1.2048136832771497	1.4413486353635858	1.408924546080435	1.2595998979534269	0.5676857667985769	0.4475674587281564	0.4987006777394509	1.0872247695120996	0.306864692922583	0.5567402249844257	0.4500264888055987	0.16119220673267642	1.43152786887415	1.5450346007677525	1.6617867501620243	1.612646685410381	1.3884535844511996	1.175947803687938	1.4627008783681341	1.448288528893622	1.3130494190121638	1.6474614479940066	1.2874394987761566	1.503284378610192	1.2559196904451373	1.5121511203009708	1.0054375057350855	1.1466807048527332	1.1003668155614854	1.5185983505773448	1.4795091489286034	0.9109378765834224	1.4461078509415342	1.5510250958675487	1.588708803161441	1.6670434624506614
EPI_ISL_17075759	1.5037166166161302	1.028608104677114	1.5424838211590282	1.2775074900918701	1.2489566449613083	1.6294353365863912	1.5531396270063094	1.1965100117359462	1.462750025070003	1.5746032845469164	1.377505947470881	1.300195698221618	1.5518101354538052	1.306580057662954	1.5390188271960072	1.256215142593481	1.3584590907222105	0.5560475619232856	0.3899798642725456	0.29370247074254097	1.0892893954880776	0.39768864531098524	0.3417614981207491	0.34799527919767936	0.46687045419307427	1.0810215178183702	1.326836742499364	1.4520551534047108	1.4802708016183104	1.5846510200039263	1.1695114323688476	1.4372405331810079	1.312881708291265	1.4655924424455855	1.6083509469794928	1.687718287284859	1.6243473828317567	1.255610481520805	1.6669139471412315	1.3080748348433833	1.4602998088176022	1.114170006471591	1.6384489094500225	1.2786611793808134	1.007663636187645	1.3557264029325893	1.4215803096467128	1.4809678727818514	1.5464974378209182
EPI_ISL_15839844	1.6009135277367603	1.2558945669938077	1.5545199386746735	1.161752092759332	1.3552578422486514	1.6010248365292765	1.6212127741857545	1.3259030770696232	1.347577468019008	1.4568123223817258	1.4848169635159578	1.3144474561753434	1.570209031473745	1.2614738612558498	1.4887251577285299	1.4105847428791112	1.5143261995075665	0.36775379154620236	0.2392871516547056	0.4706779648545243	1.0962111205235072	0.32956255617391306	0.20451716522960994	0.2120462291287113	0.41696113867295026	1.1448745261425894	1.393043475936926	1.5315308764121645	1.545123078783134	1.6734208357480345	1.3289942450893548	1.549142557776299	1.5180554671614677	1.6483280615020541	1.6552039376643002	1.6840460688711378	1.5987374698999888	1.2827571319901336	1.6458947512856201	1.3324571181238607	1.4506001093156269	1.3297854703305012	1.7120118485199374	1.4478841799968198	0.7579528868934795	1.3732750105051075	1.5103649776395993	1.6124200780258118	1.6790880462098037
EPI_ISL_15542438	1.6218640561051787	1.081372871231017	1.6335598931394673	1.343957903128792	1.3707297962520806	1.6064193730038343	1.6044596920924254	1.2652796662288783	1.4720147351122232	1.538256096619468	1.3708323494941135	1.315779284213206	1.378025698347117	1.2350672173536175	1.4813893227346766	1.3182342227714903	1.3265388570655214	0.4824546887530424	0.3569930179766192	0.598639933157469	0.9753790251887771	0.16641034909792796	0.36457640281690107	0.36178678059681457	0.33820593455277614	1.252528752744122	1.4607041208857017	1.5976242533731067	1.6503138776221964	1.5629714872126235	1.193674510634089	1.5271068957046408	1.3710923545015543	1.4239748795485252	1.6100610701254257	1.5732568669373397	1.659013007579592	1.330600912731642	1.6899749039528653	1.327263930512402	1.4538100242802408	1.116817650390743	1.651204365185977	1.365475518995947	0.8396953557239663	1.3798728654331147	1.4866937143208951	1.5998527746934854	1.641832712454355
EPI_ISL_16813290	1.5789387967896027	1.1426037390605908	1.6606473430796487	1.2473771552761515	1.3771379052328117	1.6566847587599813	1.5977479893923259	1.2796021353121543	1.4524554634315319	1.479309175569694	1.3223077464283393	1.1183816267397122	1.4740820124123424	1.3415937701993628	1.5267571693249098	1.351138709044573	1.4621714182058418	0.44757719300731147	0.2922591926737088	0.2421727603538708	1.0934149034996425	0.3978876545910638	0.30862993426283103	0.31925918847658397	0.23933035051093987	1.2785142278654447	1.4824319692463441	1.6004148270127074	1.5442564948674424	1.6183262869871324	1.1695032380687764	1.4753054059224817	1.4978738672514673	1.5004305563202212	1.7486585564493358	1.5931381543641114	1.6142205410283772	1.2672822909687225	1.6167245778051864	1.1246853769571075	1.3093943279658145	1.2168888652838081	1.697467905046976	1.4566627474463938	0.9971979047370604	1.4793759407632794	1.5458562928839317	1.597235022535692	1.6527066741201055
EPI_ISL_15878540	1.6428828897005465	1.3621686276170422	1.588744204789466	1.27648964386044	1.5628788502253923	1.5431918597153818	1.5767479287537989	1.419034766986533	1.4000789133965612	1.344752394036355	1.4636209876140713	1.2856574581109945	1.4955545241059347	1.1846556171006377	1.3157285583895488	1.5483843816932135	1.4731824451501387	0.33300871728619674	0.2112423240698572	0.431709024137894	1.1274165268882081	0.1903937962221447	0.2611845913698112	0.149941925304502	0.39364291444085187	1.37067214997599	1.5348486060561455	1.7040837252391865	1.6757764543303606	1.5700158002984468	1.420237154429945	1.612482259273816	1.623518469316462	1.680101968318672	1.7207568596007539	1.5544972823692065	1.5935710905060942	1.4107025433832443	1.6368101594193054	1.3077184824962564	1.4334461370675715	1.439028657225609	1.735124844581656	1.6148204882574	0.8191715181893423	1.4761507357148609	1.6535380629983472	1.7263312353778733	1.7340372255282412
EPI_ISL_18161874	1.6659067006378372	1.4327447947506613	1.6731537460266412	1.2733039997007878	1.6614982319854306	1.494251543983442	1.5348221019632704	1.4109127033296132	1.2947959766186725	1.1355580849198066	1.4045780487426012	1.047178184067569	1.2780086551189773	1.071917257125755	1.1748773860137396	1.5986884179960932	1.448373248234018	0.3928829221987131	0.3101501801637985	0.545869499777381	1.008093669826067	0.17126035021413222	0.476146993522496	0.3059017339154294	0.4047854551874921	1.6803296313643736	1.7376223761141985	1.8049693832191203	1.6357103858335997	1.5745022384824894	1.3367383011975482	1.5117808410065818	1.6705682233644519	1.4116883075343596	1.7233778761772491	1.2720515613469694	1.489272688418035	1.3454262879340584	1.4060037994810681	1.0735317314651762	1.273359814860276	1.4330223815212615	1.7325074139783827	1.6830701251806668	1.038673303805315	1.4886247924941571	1.714313942840859	1.7398115012639268	1.7184426949405016
EPI_ISL_18226744	1.6271501888041824	1.4472277686344426	1.4715443887631283	1.21108020715218	1.5489310283784956	1.5465105585850183	1.4925788295733227	1.4097501421462122	1.4052024773959144	1.2563034146416003	1.5272770762851726	1.4215732924690916	1.4413315253990826	1.0444218047064011	1.202663587743179	1.5027413108705	1.491411121602169	0.2415473542988238	0.1984330234412881	0.6938284041506547	1.0500211725229422	0.17583287220220034	0.26645293137951787	0.12427725203690176	0.5128181082899805	1.3396360760327441	1.4683894189082607	1.6237092869443615	1.7992343190285411	1.5811992348036237	1.4726365926269418	1.638361384908063	1.6221879071571776	1.7083481502537978	1.6668850310487917	1.6168356079431003	1.6837897779593791	1.5361161257798266	1.6855733214499666	1.4407196236914979	1.5821575769186231	1.4821781558303833	1.6721373904969203	1.578816620654194	0.6219967746550492	1.3375431158550137	1.5181508720477244	1.6864744121225546	1.63515412113196
EPI_ISL_16466440	1.5207099717313182	1.6975772115837664	1.3090495144674135	1.1870887674160249	1.7309529384888709	1.316972675197039	1.2510235689686238	1.4750314653689278	1.132618536667925	0.6742942345191455	1.516899494911814	1.2044555371960253	1.365182243452891	0.5486770657509397	0.6251554400014248	1.6601222397325115	1.3926456545912895	0.29104975807120625	0.3684514998768431	0.9751724885242428	0.9810455685113874	0.31764220815808086	0.5184504603516378	0.24147158973848593	0.9021960452631652	1.6249067340189463	1.6061999978340564	1.5658805838648624	1.5987948128542393	1.4397757598993643	1.6373131814824324	1.6275600848641338	1.7119759937626031	1.6306139251015055	1.6140016172170168	1.2296741877372845	1.479231027744866	1.500259156879958	1.2879612647260463	1.2272974865460795	1.4244831648149756	1.7282229331485892	1.6433118853762214	1.7345149144952714	0.8690640250802124	0.974708415211799	1.5850236642465743	1.686693919062729	1.4957321461257245
EPI_ISL_16208999	0.9520874991015669	0.5695973343726731	1.1378566606108653	1.2482478622121524	0.7392947359162325	1.3881330103075402	1.3091938100782068	1.1536653901649665	1.4746479475461092	1.6293059166641888	0.711765821329636	1.2385084129703996	1.1500482274031758	1.5940394441192656	1.5142105710186686	0.6937908569179201	1.100832795148484	0.9367086552206251	0.8837945703164143	0.5431291261794012	0.8992137844261447	0.8755081552990267	0.5869352321475326	0.9838871748965459	0.4891958865887802	0.7312466169450254	0.8778557903328497	0.9624146317895251	1.2011535183960447	1.0568994640889517	0.9751630039342499	1.1406276004142055	0.9982828069232406	1.1876557255131888	1.2130028421491077	1.3711895303891168	1.3260278025754544	1.1109339628467352	1.4804615204996638	1.2212412773820243	1.2982954612096107	0.7437864425779317	1.1477782392624336	0.7804071001332891	1.0320884521827336	1.234684394311536	0.9392865241382288	0.9785891261540124	1.0571297532844417
EPI_ISL_284651	1.3814671751921916	1.137728721542228	1.4563808994095246	1.1250003450008126	1.3722215665744082	1.210473210758883	1.3197271206103554	1.1544917454696406	0.9805401139030926	0.903364692833894	1.3456353762670052	0.6812661703352673	0.9547791367648644	0.8390213387023102	1.0983951103028364	1.3650530701105195	1.164941748342279	0.8899183927852085	0.7877763676635126	0.6893534024476347	0.8993742568231684	0.617366109293283	0.9998540468623852	0.8788204869071891	0.7163215989317055	1.4741411412341854	1.5040617030282415	1.403854712789191	1.0427351127422988	1.370062176418966	0.9943113159245536	1.1547694463344882	1.2167025901428221	0.8641176046289846	1.3825930243785522	0.863397595569759	1.0705142672431682	0.8764510596923548	0.9069399294722715	0.6969861762291478	0.8087946722519912	1.004966128394976	1.3537936514836255	1.2750403625761073	1.3599250169642818	1.0946479326645409	1.4876663771782799	1.3371018845131055	1.4181367087307213
EPI_ISL_240704	1.6765214403901272	1.57973221541593	1.5577536758755715	1.1985564902430212	1.7442655784777237	1.5287902133485707	1.432081124645162	1.4406220391269635	1.3162507633072624	0.9683878832816124	1.5969117958879042	1.2210474013043957	1.5441854460248194	0.8407658999903683	0.9792759164174365	1.6698166215621706	1.517360907053487	0.19718554363990592	0.18410088134185576	0.6083095673281478	1.0084507844360493	0.1948968050855472	0.28455020512284246	0.1221797187311493	0.5885445289315507	1.6040737862060173	1.6966179886481636	1.7559233116378572	1.6853342218293514	1.6424586481542516	1.5144735360823103	1.6400664134422553	1.779899299531905	1.70302382928958	1.825752993216196	1.4759407412908205	1.6335414287793744	1.4843377171166658	1.473429172029163	1.2445892194698376	1.4715040088877602	1.6837514799514204	1.836689881776471	1.7734887141029385	0.899432214047748	1.2211224427117469	1.7226351371142266	1.8090536158948713	1.690840756851619
EPI_ISL_19145644	1.3906294857033314	1.421743306928148	1.3763433804460732	0.9763460978175194	1.5206419575110806	1.173364271845982	1.0911268510379195	1.1727877973813483	1.1173061890278375	0.6188426987344635	1.292300125523343	0.7329464129111858	1.0378854565195126	0.7171109991028104	0.7669581390752964	1.499659122654175	1.3214334833716994	0.5157004232284956	0.5227575580361707	0.9131659075835367	0.6120807936543743	0.7423915236397483	0.756176441749738	0.7326984666297529	0.7080066735554862	1.651339297005613	1.6330867710186459	1.5286658720482813	1.2090296115257555	1.4867641724056113	1.0279991833734847	1.2275821641773894	1.477678440897574	1.1393276727540345	1.6306897159763638	0.9635295403795793	1.180213125883271	1.1579425264100744	0.9118867949134574	0.741973641874695	0.8172177190119421	1.4096825519955145	1.4530505747660527	1.5643694137236501	1.2045103198144098	0.9221243970053132	1.6280080667189627	1.5037953998864118	1.3276134616089963
EPI_ISL_337280	1.0807422751527362	0.8670833954785233	1.2346086423223248	1.1233715612228536	1.0635386991348619	1.2258244053911065	1.1933241877806355	1.091601540611955	1.1405571003791104	0.9976682328440796	0.7751468361914595	0.7701482681379016	0.7427761359264327	0.9220507983101148	0.9020390194625009	0.9939280393134027	0.8482868204482573	1.1519703485530897	1.1209804263660657	0.9309871853966268	0.1761369099806106	1.0700470597648142	1.2710970967916988	1.208944765890273	0.6591350299680827	1.2763801518603648	1.3335766214881613	1.1911733946552445	0.9286674805252374	1.0002036773587115	0.8548614214879457	1.084571959425655	1.1153501339805862	0.777362495273897	1.2472114456228969	0.7663552135784715	1.0122128845402136	0.915381367464395	0.9070422682103322	0.7735031065234695	0.898387745764457	0.8216924867941384	1.0530053928018461	0.9932124962106853	1.58168564162749	0.8203763635406252	1.261397489829212	1.1407793354321745	1.0305299233332754
EPI_ISL_337276	1.048850195183342	1.0003645300748105	1.0715639499122418	0.9903279741410598	1.118792304079032	1.0028902765835697	0.9981703036975756	1.0153554753388059	0.904605909736936	0.824652173407911	1.0400055182352752	0.9820826423027552	0.9406170923818613	0.8505036280201219	0.7356231511768212	1.140401757469009	1.0143431936059915	0.976762309390334	1.016832466347137	1.219941859818512	0.1000904881921334	1.1352904549166185	1.1338231822652582	1.0710116963928658	1.001923337216984	1.2008424839257739	1.254104013503436	1.1043518931248937	0.8649551752466793	1.136911212264073	0.9601212836604139	1.0404199742455682	1.0857185109928909	0.9377025177764136	1.1758776722293578	0.8885399808603639	0.8955780468705945	0.9435678148440426	0.8168844108967549	0.9959230293666099	1.0379639886212204	1.0786766341296488	1.071354522722569	1.0460315600676398	1.2338786430637834	0.764609845150642	1.2339568711471147	1.1767324068620912	1.0640334201534734
EPI_ISL_200838	1.3860603436892913	0.961911392680843	1.6283121204209516	1.2777204814489047	1.1930143201632948	1.5770788755496228	1.499974413094165	1.0916275215696873	1.5840131706721867	1.4034982272001122	1.1395754600149661	1.1576781262439264	1.1160817848210987	1.1509155064390706	1.35256687205134	1.2372185909223832	1.0908393910588212	0.706269012829382	0.620292613873582	0.39300132747157257	0.6882042904311998	0.49745769188146427	0.5152997997908686	0.6426272524524449	0.44032562343637816	1.3899238534683165	1.540574819972821	1.6000633842593008	1.4025499270075956	1.4231322123658012	0.9055093488905408	1.26236997169931	1.3355571290820882	1.0809417216312407	1.6482802131333003	1.3569038683466488	1.4961769898628512	1.2759773575482065	1.437970070966295	1.1780068378133093	1.294090304502909	1.0549562716443672	1.5606818688563977	1.3503114577225488	1.4604942294422036	1.1061071173772201	1.661933557718652	1.4873359674174522	1.4498961003159447
EPI_ISL_3770721	1.2560639503779973	1.356222709368168	1.2773000267320618	1.0221745476677702	1.4690735806390274	1.137677508054965	1.0700705194546891	1.1643379137090641	0.9591160778853487	0.6395814257171348	1.1570716798375942	0.7224715988824715	1.0069027846862961	0.74871363583139	0.660497395425376	1.4385997613016956	1.2823612803281168	0.6194617270252261	0.6421155102139295	1.1142688938996832	0.5059101114945012	0.91911324196361	0.8775913273334196	0.8197107828977376	0.8182077622827695	1.5922333555146668	1.5706959314504598	1.4036162112580663	1.0693099622467168	1.394055033236662	1.1030028183313279	1.158724873049249	1.3650339955840647	1.089713735164447	1.5235094825334863	0.9457440394667986	1.0722628334484055	1.0800531377282263	0.8113333371830365	0.7460778645827734	0.9493084116924639	1.4337190727635365	1.2874294075648767	1.5039743135155028	1.1370618949201905	0.8462894337991762	1.5630115005073653	1.4682055775903606	1.1720604333579112
EPI_ISL_207048	1.5333603485014264	1.2936569153470274	1.5681402451563147	1.32625305794014	1.5036728386368818	1.4778990813089623	1.5299564124226737	1.3455100062354233	1.2068485478401403	1.1400659865726737	1.2662906627071449	1.179841695818578	1.4091960808149837	0.9715454146560198	1.049721667675769	1.4296675939813985	1.2928881845597011	0.520096761125465	0.45599214328014304	0.529195840203313	1.1997322641080543	0.28730218557500176	0.4546065101707071	0.2974252273315694	0.6394257378334607	1.4583976647673689	1.5433475823775145	1.6088806466654195	1.5010867210598713	1.3734360629897486	1.4182729049297431	1.6037288482516423	1.545927945728672	1.5365704982854467	1.544024288766496	1.3490035636215445	1.5114759205232522	1.3542213552552957	1.4790370967397055	1.1985965271090675	1.4057776486508615	1.4159314670198047	1.6481487196307958	1.5758760535853016	1.1180556780057083	1.3208791915584963	1.5541189793958732	1.6705184859844726	1.5810434839000305
EPI_ISL_332439	1.6500264659363224	1.3136260973262461	1.6450676135897844	1.2142385964090676	1.480592125923243	1.5986590829232616	1.649352250958717	1.3886013510816801	1.3955346307002503	1.4081360963668794	1.4413926928678946	1.2166917640740553	1.4843515487838916	1.2495602312543366	1.453740378893781	1.4961100270328203	1.5028167414325242	0.36361853595893645	0.21850535219781986	0.3164204700133386	1.0914787033802913	0.27410774385097536	0.26589700640678227	0.17390454058074956	0.3081876149512053	1.3209002010527542	1.514137299331209	1.6724204406858978	1.601381723293057	1.6238606859984293	1.3400052779777902	1.5721786923986434	1.599113747244505	1.6250633285917049	1.7518218374863834	1.5716052911825356	1.5752315077604964	1.328630303623166	1.639395367929834	1.2353871045192113	1.3667809723339557	1.3495356255656463	1.7203747867018837	1.554279803430578	0.8858345809362143	1.4845588035655288	1.638287581103528	1.691791087397592	1.7566884826156983
EPI_ISL_697211	1.709320226248058	1.3014718807446968	1.6393681859517844	1.2744532511340316	1.6134784236368773	1.6339731247625457	1.6726548121864706	1.4743221176022319	1.2747967097368709	1.319092641145018	1.421850193029918	1.044536494163305	1.3877762895605232	1.1624145380175284	1.3327271832657084	1.4643289054505222	1.488459424979458	0.4049243935770792	0.26759114192218936	0.5621046552580286	1.0032286082991666	0.2093486694893425	0.4424535868924723	0.32031850407947327	0.24291577698675937	1.400506766804952	1.5926210953136084	1.6364332479931445	1.5882965496647632	1.6026786719224893	1.3885995680512173	1.6351677525604376	1.5648872090280874	1.5433074994883333	1.7177223646350317	1.438131207261954	1.5775946477668294	1.2216465744519915	1.5310440281324276	1.0627575201074484	1.344220825795691	1.2775658455095773	1.663614508789353	1.5245650796965817	0.826942059303331	1.4189719360051365	1.5826470200501115	1.7134198040634094	1.6987560074677832
EPI_ISL_4031450	1.5949213845860912	1.1699454028919771	1.5973770738739868	1.2831680244510046	1.4021699266111483	1.6483454250675742	1.6238847993997405	1.3272970807810143	1.4908116980349213	1.5063748438732802	1.3627664007831735	1.3023398661622578	1.4419285364879268	1.2630246640050924	1.4435794814546627	1.3853877931165166	1.390100029278979	0.3920322778649157	0.25738694314754396	0.45045343043616426	1.0505421762877452	0.22301466734104702	0.24802499799084854	0.26299884631829074	0.28494907054163354	1.2613602382466698	1.4721095753949944	1.608607209728949	1.648585716087445	1.587440478078274	1.27711277612184	1.6083755536701974	1.5122251828247844	1.5847746788286234	1.7087477978154189	1.6190671431557897	1.6854492955092377	1.354889484723619	1.7130184562436752	1.3140755042430696	1.4721605942988536	1.256447708210962	1.7286733456220111	1.4646398209265266	0.8730374367837067	1.39283129704773	1.5885170957211607	1.647695076621827	1.669205759567149
EPI_ISL_17768811	1.5925704417630597	1.1663230115362602	1.581657345767065	1.1685758867944305	1.4302262406763644	1.4596429314771862	1.6169144240687334	1.2955306597427947	1.3978741287222642	1.512511761769538	1.3616402524058364	1.1389112571797264	1.2754320202546037	1.3727155249219336	1.5359748710749417	1.4551079378744467	1.2266038962094057	0.5722136190215064	0.4324116709407554	0.3993101168162596	1.0363096669566563	0.2515171834827382	0.4236740229614261	0.38882710656476716	0.2545514843833324	1.2951169951465058	1.450666274128336	1.5873575698627902	1.5095550165127065	1.404194754697738	1.16508282490705	1.5186633435888228	1.4003970696366417	1.3939841656293583	1.6132692136730833	1.3423929857481862	1.4172869266083084	1.1655508987298275	1.5599901498806885	1.1523451916689254	1.2575283314225438	1.044904758125363	1.5244331937503097	1.344876276403282	0.9210771480773202	1.5277752430009972	1.5902789779058533	1.553032922771096	1.729732048340845
EPI_ISL_6795265	1.294932192792403	1.087963218561297	1.1902839268950711	1.005091582156318	1.2922775092373973	1.226044456386989	1.253251832596482	1.2240450904702107	0.8505243612675601	0.954455873948426	1.2925096539486578	1.0202818841559336	1.2507899345828155	0.9041891258287886	0.9147312446458036	1.2224843635868412	1.2383322267192773	0.7914031692830661	0.7836435320236315	1.0271250045973113	0.2773982146514897	0.9558393970889192	0.9138066796070236	0.7809712865790333	0.8184003253660271	1.0843418511067575	1.2561639793075823	1.119832232147662	0.9651041729115487	1.3093468788980656	1.229359720594092	1.3358070639504227	1.2082344450596634	1.2928128607186293	1.3386328077126406	1.1473068298002234	1.08773030033518	0.91223833659519	1.0376613459605892	1.030734764007447	1.2212816850823094	1.1267735791319116	1.201089114900648	1.0740510755265378	0.9667909019294432	0.8671129767828633	1.221544968506149	1.3448632849265687	1.2842408662516196
EPI_ISL_173146	0.8731248697755267	1.1643967657838716	0.8064068805461461	1.1879918813344836	0.9946650685170105	0.823268718046334	0.8003764745381092	1.0272939689434815	0.8155151472100298	0.5667092942292915	0.6536452831104425	0.9123084878493543	0.6216075005117006	0.25299796238449457	0.3480414766616191	0.8316241853226954	0.45651288600137263	1.3391608710616776	1.474074848757634	1.4347584138833342	1.1041937068061713	1.3811138726190944	1.45733721622462	1.2066369234917964	1.3909255444044333	1.0977972749680915	0.973572122680539	0.8685021719861484	0.8165429327462591	0.4024216580302534	1.148353384482293	0.9720143263769029	0.8934131080656511	0.8530693569759875	0.6525960934263282	0.58935197606688	0.8787754577186662	1.0869510812194247	0.7441925479205438	0.9197830450638064	0.8816542305214916	1.1185945278055518	0.6589180580647901	1.1221617144465132	1.2309999774480345	0.24247734254421294	0.8651760404731172	0.9734884846780905	0.6732608442341148
EPI_ISL_295520	1.6804894067992893	1.21009636500388	1.6926013412889285	1.3508485828649806	1.503968165146747	1.7237252115344721	1.723946627509505	1.4526517008597444	1.4671562953335064	1.4081970158428199	1.3040729511031761	1.0590317073401518	1.3661110673060914	1.1305329968871707	1.3943127720419948	1.3738664201992676	1.3039467911057019	0.5236417312607929	0.3783327717056283	0.3320238375272915	1.106520059877197	0.2057982503524879	0.4232190841033655	0.3529471541302841	0.20739422391262696	1.375910927620255	1.5744404420114737	1.6485121147700792	1.600487353702766	1.470526405310819	1.3239470835621627	1.6637950964347863	1.558566711034341	1.503246564338195	1.7298471038851835	1.4274790872136727	1.6677228922343341	1.2681806077847027	1.6198824404256786	1.068272294570771	1.3224788075578395	1.1586311724103384	1.6745220504047371	1.4692131086076465	1.0950834766452036	1.3267955057743575	1.5848497015841614	1.6612641242664714	1.6566712962701347
EPI_ISL_221721	1.7101307818926093	1.372958526699863	1.6445670356334463	1.2816259024638301	1.6167535768492813	1.5200205703394114	1.5855343890976066	1.455692312692226	1.3879860177832959	1.3294050596270326	1.4785154062020265	1.1719571820980277	1.4785524292313132	1.2165279651297245	1.3719197136968693	1.5620188160398518	1.4863471120976108	0.3594460736183891	0.23462357136457712	0.4230227190317518	1.0849798476612658	0.18286673823044286	0.3000308355972693	0.22185383640266731	0.32454707811972616	1.4334747462875244	1.5977870021089329	1.7372389275867286	1.6397665984748016	1.5849845375685647	1.378579736901409	1.5584440283594747	1.6140948603378051	1.6000886636944076	1.7451303169293086	1.4612745561266047	1.531959309608927	1.3314873554767177	1.557179167586161	1.194167864779707	1.3189889388028888	1.3841758304555978	1.723774102018715	1.5998261106252083	0.8234789397451743	1.4911737681094075	1.6591073773945264	1.7308750534157977	1.7735632365939926
EPI_ISL_266596	1.6479739285635229	1.454385003053535	1.575123833285573	1.2735899759170752	1.7072507094470302	1.401483932519331	1.5472662415867826	1.5598737399901066	1.0033745111056762	0.9912584201023645	1.4243184362409549	0.7883627803822023	1.365738922969781	1.0371694595518153	1.08757257770764	1.6028529504943765	1.4566267999390905	0.4969010671668045	0.4371025122748672	0.33382840306900086	1.119797983594598	0.48310105792968616	0.44634432240971766	0.38711512654979174	0.5528214975132086	1.5731000642817627	1.6580698634477158	1.5150916650722712	1.2299856873002526	1.5061902390997577	1.4776112338038505	1.5863194802880742	1.5448804345527472	1.4882772195228866	1.7084032928540256	1.1184307838664718	1.2724837471024057	1.03618928452018	1.1681960224257013	0.8063191074748013	1.1090487570922825	1.3700066705868288	1.6001110721964273	1.5747812832773116	1.1810324439211022	1.2476879812109158	1.6506258605767736	1.6938832262928187	1.6893749939583378
EPI_ISL_502202	1.1808766991739277	1.1558075873079836	1.1328689323033496	1.0438535903577872	1.18968528621434	1.0749149984268216	1.1174659820738881	1.1812913889104908	0.901501542950994	0.7210185566826139	0.990234416077463	0.7415044121738794	0.8220884508562918	0.6288558624736131	0.6924631394553287	1.1597976121298417	0.9371908558250845	1.0307032346058702	1.047016366809961	1.184835812136383	0.2627585333276047	1.1498421222357567	1.2174600907641877	1.0950464855157176	0.8962562484373073	1.282303639814379	1.3333063606783373	1.1005624478628013	0.8316270958564888	1.07599248309384	1.0432793957500424	1.1756109982617016	1.1448539509377667	0.9283828421586569	1.2111206197924376	0.7164413703194521	0.9231498657814383	0.8756205999125097	0.7653264650253025	0.7481890228006255	0.8095389792417774	1.0153335089603877	1.02609456593945	1.093692090726056	1.3332957105167795	0.5428327676850953	1.2541285502971609	1.211871012712231	1.0520527100181334
EPI_ISL_14174437	1.021243122020482	1.015267464191814	1.0411357690976268	0.9309146930716614	1.0225173342904679	1.0546326586247665	0.9834451318888698	0.9379268103778653	0.9791282149255369	0.8240342752599668	1.0097991488526403	1.0222129340110575	0.8776691514511822	0.7697928290508647	0.7318303775104296	1.050830889417269	0.9464033323924361	1.0460263165965307	1.0740917925298428	1.219868519696697	0.11708438869625071	1.1947569035730392	1.228804400070191	1.0960628879046663	1.0559447315465122	1.1451878799871984	1.202757628128305	1.098036115061809	0.9105473815908127	1.0904474160866269	0.8832937022268138	0.9741509161745268	1.083441326180522	0.8746756888483112	1.100571976909707	0.9276931059720039	0.9454019161785552	1.0110861717882922	0.8505395379555132	1.0381909520285388	1.0442078421567986	1.0474542958149893	1.0060883507057035	1.0165230443418825	1.292432549409533	0.6976584996364735	1.1572857737169349	1.1076978769107502	0.9534399408879796
EPI_ISL_278205	1.5985676498225945	1.014196326286857	1.7162140737732083	1.4203201837907509	1.263425253978304	1.7628522576371135	1.6488132056615274	1.2076115817692668	1.6366443837577416	1.5173320379794366	1.0643472157022493	1.1311017831210624	1.113294516266347	1.0724112051723893	1.3489234708374567	1.1286320168423813	0.956875405712721	0.8231471626087102	0.6728701811640607	0.277487964404452	0.7750004504892418	0.517205048747958	0.6179903544512864	0.5891967850452107	0.30507910480057565	1.3638781930171289	1.588354867567355	1.6440966010462796	1.4870259195142768	1.3002106027369273	0.9804374884978695	1.4382348705640204	1.3792007383729443	1.1783255603235874	1.5931207871339987	1.379936312201954	1.65336349671975	1.2935342560937062	1.5693444301942354	1.1474143962854042	1.3204921232843279	0.972141356759533	1.5190064343464633	1.3377828852151383	1.5143998237452525	1.0300956205896408	1.5538654667945537	1.5779904626136643	1.4410417354255816
EPI_ISL_230758	1.7408147027273069	1.5406973966439972	1.6658271907439706	1.2573760431017553	1.7471363682225336	1.4459705663453843	1.5777567444811331	1.5175002478026536	1.1804713277250687	1.042455968809699	1.536712630425893	1.0208406603291167	1.442152893364379	0.9435169652226928	1.1345258004695036	1.7256148338339234	1.483942959390295	0.2967108288360044	0.2541980229941039	0.6230791794696886	1.0464266031185987	0.16753258896530088	0.3280043295739523	0.20906513065825882	0.45741795935574237	1.6397795275957594	1.7377872322468373	1.7309650948278612	1.527443557287863	1.619569223796053	1.4993515164567492	1.6528626556531658	1.6780215651896928	1.5757825735796218	1.7996607861837668	1.2694482835516339	1.453063316054429	1.263681011183201	1.3707149774764718	1.0449137043069665	1.2442434140029197	1.5066120236189673	1.770961425701861	1.7220435816916626	0.9079996231171323	1.2834590623468423	1.7695840716064626	1.8136787298132697	1.8186627571623917
EPI_ISL_199290	1.74986335116017	1.4865908093824811	1.7073817671888545	1.3330378505134477	1.7017995134252604	1.5412527702779586	1.609764597802386	1.501795306551316	1.3602921920092546	1.1719164157493476	1.4279554269840733	1.0988545726011736	1.382533617879662	0.9924695624671749	1.1777434972914111	1.6281687095392274	1.3637083230976264	0.36496390411722734	0.3072055238321153	0.4645306727965879	1.0593679182159994	0.20196818785505533	0.31274885489107873	0.21164305755913138	0.3816580993292603	1.6225199566730955	1.7398026985263422	1.8010289605126224	1.613293919258527	1.5055845608597487	1.4388942033824548	1.6346848192045056	1.687779510483352	1.5714759802346916	1.7966125263674049	1.3309779687576153	1.5436217910937728	1.3665182782557435	1.4792529257919516	1.1259835693671412	1.3125986741290234	1.4704509894896938	1.7366362145413325	1.7291475447986793	1.0157817708412704	1.269046241819357	1.7740312415068993	1.8303665475501574	1.7741538120405913
EPI_ISL_206569	1.6786674900417078	1.4710887842298557	1.6243279638331187	1.2626923683376439	1.6540786717720386	1.5240191310340419	1.585904793716033	1.5079768220355678	1.3081806420584285	1.2187585787677804	1.4692949970136389	1.1140518226981921	1.5088085972231968	1.1175127538828646	1.267087190237227	1.6226054747699807	1.4836837889947838	0.33821490749708816	0.25825268176186655	0.44952655432576194	1.1553880552072782	0.21877497527475753	0.29095062836518126	0.187751126433517	0.3932994276914623	1.5075819381475846	1.633636471511837	1.7189789224875671	1.5897385213138824	1.561825656046458	1.4944836034020434	1.595064169637682	1.6907149421628613	1.636137315269647	1.7741888416401377	1.4068477303300404	1.5153752093350537	1.3161370276798536	1.4856527097018064	1.1397112203331818	1.3511495470440127	1.4958877160128834	1.7474889041490822	1.6661533949444072	0.8737333919617368	1.4048544412948223	1.6922039856120394	1.749389316427024	1.7598656713075052
EPI_ISL_196101	1.629771646686534	1.0865774447189778	1.654536363948421	1.3120242771586708	1.429435270069497	1.6305157553725298	1.6599717859072474	1.3675833564306266	1.4643750946941103	1.5298881296491322	1.3397233377495628	1.1546329345517594	1.435644405163743	1.379911249115197	1.5275107746522596	1.3547793708907927	1.4200158050505245	0.49441226630178237	0.31548293026051066	0.38565662998603223	0.993659720469854	0.16994940963489646	0.3572106578766726	0.4036427678376524	0.22156206223134733	1.2829803829844315	1.5109347425823694	1.6305177961527417	1.5811150194774688	1.5924491423843854	1.215913829734068	1.5394475049688303	1.4688312187634136	1.4662013838353543	1.685891185858438	1.5063723271838372	1.591279565858529	1.2260931602894969	1.6182295432286569	1.1662641267213003	1.3349850370776286	1.1216510033976141	1.7053454043568985	1.379312910653665	0.9675121729832478	1.5296153342292245	1.5552025581445221	1.6048074533105745	1.6717110939733455
EPI_ISL_502208	0.9659240185184716	0.9812707449138363	1.0066078909763019	0.975885499308292	0.9919567141416222	1.1281373802474177	1.0453444252676531	1.1071645961437253	1.001425760983944	0.8396956967302877	0.880856064474338	0.9725986803186655	0.8723411092699802	0.9049364398129239	0.7301344530372293	0.9591861766151574	0.9951248987729645	1.0670534503817533	1.1280889918953705	1.0955299031593806	0.11543278837862136	1.2530552766336727	1.1375828788610851	1.193605474986018	0.9930801864504811	1.1199915100927342	1.1940371046902762	1.042396119389136	0.8692681680813573	1.0296328494670353	0.9794859378016458	1.0043043417472801	1.180102048888269	0.9438100498019226	1.1112377970026879	0.8873208378441114	0.9365828272839499	0.9729666389314253	0.8081557158552369	0.9898263716770771	1.0716067105508338	1.0660812238858832	1.024804414412908	0.9901053693011171	1.4035980571899864	0.6969042524215159	1.1177584606749396	1.082213797695113	0.9016115648054494
EPI_ISL_255191	1.6421651801767965	1.4556199890045431	1.5700737363147936	1.261096514063362	1.6019056042948168	1.6222521090707713	1.6044714626115533	1.5490967921140837	1.3785123921148525	1.2194174983413852	1.445609045395812	1.1737200625209454	1.4991030277826705	1.118396371081985	1.2185105939756207	1.5600792554654488	1.52646685841346	0.291343482076451	0.2234703670941206	0.37521986877524593	1.0750857387201709	0.27965198872177977	0.2064197402985506	0.1791497104646541	0.39541066339380937	1.4421905023407016	1.5984610555992038	1.651394717226986	1.6229772937810525	1.5959412877409442	1.5163524290678008	1.6795316631258825	1.7408466417095145	1.72881999969251	1.8123512713195098	1.4979148421115331	1.6122834639852188	1.3782832757328107	1.5485552313645412	1.1941303965374852	1.4303487575289715	1.5048811845653542	1.770361063974707	1.6434833189203966	0.9452922061219293	1.3196166659085262	1.6685558026518987	1.7394595399495234	1.6901873993486356
EPI_ISL_206445	1.565938172161352	1.362593217012517	1.5150893691428258	1.250269616899201	1.6069474773681862	1.532032284197136	1.494784112672702	1.4419689292416484	1.3707725674726592	1.1647610314913004	1.5027454262519853	1.333232906995697	1.5938211449899116	1.1259926283115287	1.119375389018239	1.5653631334686344	1.6022974550515796	0.20515419440461735	0.1493321840052112	0.5323649044905485	0.9719050324303173	0.13561216332850212	0.1603746775234176	0.17466823450138003	0.5657679513873026	1.4314058625945483	1.5730031372532338	1.6601301514380296	1.6667619480577542	1.6777249299162045	1.485441698756154	1.6408149401924246	1.6733138635992466	1.7375185809165672	1.7867287982476312	1.586691932119273	1.618528607636933	1.4687398879913545	1.5746248665822795	1.3557799518650113	1.557908686133894	1.5692698375334357	1.8219514447136227	1.6338425280863653	0.8715954105550652	1.3940340908263678	1.682026813043634	1.7402387688647905	1.6491977738671642
EPI_ISL_2081528	1.614880633795544	1.638517427788409	1.4280529877410357	1.1625857454011472	1.7466456946981166	1.4015112262385931	1.3625466552759646	1.4804426057993205	1.1938730570367713	0.9045442720744334	1.676052122187889	1.2339040342181289	1.5918023997129052	0.8848120997943619	0.9463649172759426	1.7436351811087547	1.671711759285261	0.10868663396975342	0.09950212865692498	0.6946114517447215	1.0539129549222306	0.2619347307808165	0.21511868378817645	0.07798511199326663	0.6943047488878348	1.516499330638717	1.5976086045352593	1.620775379201803	1.6338345268205652	1.7176925754526144	1.5961082589727735	1.650579721377629	1.731496657654989	1.7983859928912733	1.7993472360049378	1.5016261334024898	1.537149663017345	1.458720707996412	1.4275211255344815	1.255641334927103	1.4349883315843972	1.7380296082581332	1.7824070468175817	1.7601325059805308	0.6810665227529629	1.2516945939710258	1.6815251511357903	1.7702229574948118	1.6759911418205062
EPI_ISL_4805852	1.6830482646264269	1.501579269372929	1.5730556236531914	1.284649475917596	1.6782101206757654	1.580265455298848	1.5436359637415635	1.488466262611269	1.3598635223091755	1.1507757456731784	1.507682732907114	1.2420077657220012	1.5046976810085666	0.9804186155449411	1.1096708638395976	1.6110086700895478	1.5049024286973438	0.23136852015418208	0.16994795262937124	0.4835571584174094	1.092241561533507	0.21877744115612674	0.22993618298229712	0.0906688358613168	0.46714606572300477	1.491043676919935	1.6218124276231238	1.6936819493491138	1.695991141267142	1.6044671094841676	1.5247014408589923	1.7216998195282054	1.7123380491505706	1.7581072755633191	1.8091466466036403	1.5316440435865086	1.661400058003041	1.4713808963295218	1.596652722650095	1.2605569359397193	1.4719076901478285	1.563577284077549	1.7751716120041452	1.714081832146432	0.8617604982061671	1.2884064893976328	1.6920291700769585	1.803201653221433	1.7097676121364314
EPI_ISL_4805936	1.565185262149058	1.5492155111674832	1.4790991121137262	1.197115476415068	1.771562178912614	1.500896615265388	1.3487823085266026	1.4960810767738737	1.2403091247523783	0.7952008305399436	1.5032653252489463	1.0765596025601574	1.4813256883707988	0.8581546120075025	0.8149274771527418	1.6308648684633056	1.6549287239200132	0.15486025599612907	0.1684900778039078	0.6716265970100397	0.8658732786708361	0.28330450783245853	0.32251458282999457	0.2753428315784593	0.6194860577506633	1.6619930167496337	1.7271940347704555	1.687847700725187	1.6044498696102312	1.7020557392326163	1.510961557512882	1.5903793398914225	1.7980056371209576	1.6662795212082702	1.8568448083169593	1.391574591714909	1.5675756403177648	1.4467260617807722	1.3154953753794638	1.0980951648692308	1.3888726468801917	1.7419939048527264	1.8465000080383254	1.8047339512381098	1.006368250644107	1.2087559570829198	1.7239611518121867	1.777279996348598	1.5748546386780444
EPI_ISL_4804850	1.5892783226693354	1.5096147181678936	1.4980190347840507	1.2683021313824525	1.6751637496751037	1.5124433398147568	1.4612707969709744	1.4792537665737115	1.295025711062223	1.0708189624789373	1.5098579462781294	1.2675541495474936	1.50973268830557	0.9818427329038906	1.01298442978913	1.650614325133438	1.5763338657307733	0.19375124067884086	0.15281062681141822	0.5438742687023443	1.028298024405727	0.2850976648452809	0.23840620864321393	0.08160667925114051	0.5475975290623412	1.499583757352668	1.595798525108654	1.6577137481616657	1.6786058259386825	1.6176549590039362	1.5626616763343268	1.699938509607783	1.731853927149343	1.7916635740670004	1.8056460063865973	1.532575342617351	1.6096008097661163	1.4992083051657212	1.5460524613910325	1.287135432748356	1.5011093207885011	1.6494175045148753	1.7625437666924642	1.732538134872569	0.8136694245623464	1.322425284906367	1.6926426344547898	1.7876666640890635	1.6749078679345595
EPI_ISL_206492	1.5868535871774303	1.3545503018842135	1.657769171147201	1.308441900569275	1.6025535114173106	1.5595775766149025	1.5404100397141212	1.4417544087109313	1.3498176418073276	1.1568572851337948	1.3710851545120688	1.170524493433675	1.4209125987587796	1.1419897779657873	1.132002270453326	1.5616334448127323	1.5685721282663976	0.2922771527364192	0.21846186734396322	0.3257839760439203	0.9041811061364636	0.3337879435358706	0.2362941207559367	0.21430433672614335	0.4395442451502911	1.5735375171168893	1.686111361706704	1.7638832364093293	1.579440038763356	1.6302077939936637	1.3962407303021795	1.5715009269942621	1.7165884026885267	1.6307270879872942	1.8471057126475465	1.4753512342960566	1.545172952398739	1.4261350538581397	1.4832050074290026	1.1960984606930065	1.4054953684975935	1.5630363219464918	1.780055372078003	1.713515701187078	1.0980231113437318	1.407128648681898	1.7791283721235356	1.8078489061962864	1.6893929336715212
EPI_ISL_369366	1.6138929386398468	1.5494710932018054	1.5296599482136934	1.129498679354747	1.690548207600441	1.4413296165440412	1.4371847070688493	1.4443263875651953	1.1654433280531613	0.9893804144669783	1.630104765195113	1.1366961133007412	1.6450999377852593	1.0265833228662982	1.1064522127984522	1.7056873588601276	1.71753982314948	0.16572996731402978	0.106714781269178	0.5611023211121374	1.1432084115626102	0.25378783151703166	0.22737509296576253	0.11740295511491239	0.5851329565615455	1.4975588626583964	1.60378621622037	1.67840879205423	1.5695509511484564	1.748740110425064	1.52746912231758	1.5767642662847061	1.750153141069989	1.7491661438906414	1.8007350267933242	1.5068223307076027	1.5010788575751213	1.3581046101375331	1.4053466062086135	1.1596454264789866	1.352159566433142	1.699132636577827	1.8321929871184388	1.7460784974207486	0.7557103519272816	1.4295880222997894	1.6833347343956842	1.7525649983707439	1.7251241268978625
EPI_ISL_135216	0.33341339631589706	0.6596230647500887	0.4504524306892034	0.9079864902486408	0.4180673982143497	1.0149180470572785	0.6656254411475571	0.8056850554606247	1.1776628869863943	0.8943678177146595	0.43707966238069795	1.1875856891066945	0.8058355705473406	0.9062808439971295	0.6885910209299884	0.3626556392448541	0.8402508441518755	1.275175641053936	1.3343652727324633	1.145363836128019	0.9621988643469941	1.473122022689648	1.3211652444796258	1.3761921565783009	1.38463383472728	0.5509173671605665	0.45110887766633534	0.4873080876854592	0.955245729741633	0.6052059018605269	0.8951960197766485	0.77026714158606	0.7926894084636745	0.9011996085430611	0.6228153066390174	1.0908970366751833	1.0772315226817943	1.2387483402215622	1.0570687317686625	1.1633579506538816	1.1866715680765183	0.8674579553089445	0.5897076088858281	0.5922751081027084	1.185278929740749	0.7301019232781913	0.42723631144257146	0.4575631775925495	0.19389572789395437
[truncated: 87 more columns]
