# Supplementary material for: Dominant substitutions underlying the antigenic evolution of H5 influenza virus
Source: Research Square preprint supplement (doi:10.21203/rs.3.rs-6040842/v1), 2025-02-26
Supplement: Supplementary file 3 [file 50dff481f23a3dd99d9b27d5.xlsx]

## Sheet: exp139_clade
Isolate_Name	Isolate_Id	Clade	Host	Collection_Date	Country	Continent	Subtype
A/swine/Shandong/2/03	EPI_ISL_4138	0	Swine	2003	China	Asia	H5N1
A/Thailand/5(KK-494)/2004	EPI_ISL_4046	1	Human	2004	Thailand	Asia	H5N1
A/Hong Kong/213/03	EPI_ISL_268	1	Human	2003	China	Asia	H5N1
A/Thailand/676/2005	EPI_ISL_10049	1	Human	2005	Thailand	Asia	H5N1
A/chicken/Ca Mau/1180/2006	EPI_ISL_132309	1.1	Chicken	2006-12-27	Vietnam	Asia	H5N1
A/Hong Kong/378.1/2001	EPI_ISL_67998	3	Human	2001	China	Asia	H5N1
A/swine/Fujian/2001	EPI_ISL_68082	8	Swine	2001	China	Asia	H5N1
A/swine/Guangxi/wz/2004	EPI_ISL_65327	9	Swine	2004	China	Asia	H5N1
A/Cambodia/V0401301/2011	EPI_ISL_98738	1.1.1	Human	2011-03-31	Cambodia	Asia	H5N1
A/Cambodia/X1107305/2013	EPI_ISL_164600	1.1.2	Human	2013-11-07	Cambodia	Asia	H5N1
A/Cambodia/W0329318/2012	EPI_ISL_166660	1.1.2	Human	2012-03-29	Cambodia	Asia	H5N1
A/civet cat/Cambodia/X0313307/2013	EPI_ISL_166659	1.1.2	Feline	2013-03-13	Cambodia	Asia	H5N1
A/Goose/Guangdong/1/96	EPI_ISL_1254	0	Goose	1996	China	Asia	H5N1
A/swine/Banten/UT3081/2005	EPI_ISL_76967	2.1.1	Swine	2005	Indonesia	Asia	H5N1
A/chicken/Indonesia/R60/05	EPI_ISL_2917	2.1.1	Chicken	2005	Indonesia	Asia	H5N1
A/Indonesia/CDC625L/2006	EPI_ISL_5769	2.1.2	Human	2006-05-22	Indonesia	Asia	H5N1
A/swine/North Sumatra/UT6034/2007	EPI_ISL_76976	2.1.3	Swine	2007	Indonesia	Asia	H5N1
A/swine/Tabanan/061/2006	EPI_ISL_190517	2.1.3	Swine	2006-09-30	Indonesia	Asia	H5N1
A/Indonesia/CDC699/2006	EPI_ISL_5773	2.1.3.2	Human	2006-07-06	Indonesia	Asia	H5N1
A/Indonesia/NIHRD11797/2011(H5N1)	EPI_ISL_98856	2.1.3.2a	Human	2011-10-16	Indonesia	Asia	H5N1
A/Indonesia/NIHRD7781/2008	EPI_ISL_343382	2.1.3.3	Human	2008-03-25	Indonesia	Asia	H5N1
A/swine/East Java/UT6010/2007	EPI_ISL_76973	2.1.3.3	Swine	2007	Indonesia	Asia	H5N1
A/Indonesia/NIHRD9152/2009	EPI_ISL_343411	2.1.3.2	Human	2009-01-23	Indonesia	Asia	H5N1
A/Xinjiang/1/2006	EPI_ISL_79681	2.2	Human	2006-06-19	China	Asia	H5N1
A/cat/Germany/606/2006/	EPI_ISL_10333	2.2	Feline	2006	Germany	Europe	H5N1
A/chicken/Egypt/Q1182/2010	EPI_ISL_103200	2.2.1.1a	Chicken	2010	Egypt	Africa	H5N1
A/Egypt/14725-NAMRU3/2006	EPI_ISL_11384	2.2.1	Human	2006	Egypt	Africa	H5N1
A/Egypt/2331-NAMRU3/2007	EPI_ISL_11872	2.2.1	Human	2007-03-16	Egypt	Africa	H5N1
A/Egypt/N04979/2009	EPI_ISL_31745	2.2.1	Human	2009-05-31	Egypt	Africa	H5N1
A/Egypt/N03450/2009	EPI_ISL_31736	2.2.1	Human	2009-04-19	Egypt	Africa	H5N1
A/Egypt/N04822/2009	EPI_ISL_31743	2.2.1	Human	2009-05-25	Egypt	Africa	H5N1
A/Egypt/N04915/2014	EPI_ISL_262572	2.2.1.2	Human	2014-11-12	Egypt	Africa	H5N1
A/Bangladesh/3233/2011	EPI_ISL_89366	2.2.2.1	Human	2011-03-09	Bangladesh	Asia	H5N1
A/Guangxi/1/2009	EPI_ISL_96894	2.3.2.1	Human	2009-01-19	China	Asia	H5N1
A/swan/Shanghai/10/2009	EPI_ISL_105043	2.3.2.1	Swan	2009-01	China	Asia	H5N1
A/Shenzhen/1/2011	EPI_ISL_891209	2.3.2.1b	Human	2011	China	Asia	H5N1
A/mink/China/G/2015	EPI_ISL_243347	2.3.2.1b	Mink	2015-07-07	China	Asia	H5N1
A/tiger/Yunnan/tig1412/2014	EPI_ISL_221726	2.3.2.1b	Feline	2014-12-15	China	Asia	H5N1
A/Yunnan/DQ002/2015(H5N6)	EPI_ISL_200838	2.3.4.4e	Human	2015-07-10	China	Asia	H5N6
A/Viet Nam/CM32/2011	EPI_ISL_165438	2.3.2.1a	Human	2011-10-19	Vietnam	Asia	H5N1
A/Victoria/149/2024	EPI_ISL_19156871	2.3.2.1a	Human	2024-03-06	Australia	Oceania	H5N1
A/Cambodia/NPH230032/2023	EPI_ISL_17024123	2.3.2.1c	Human	2023-02-21	Cambodia	Asia	H5N1
A/Cambodia/i0125001G/2024	EPI_ISL_18823967	2.3.2.1c	Human	2024-01-23	Cambodia	Asia	H5N1
A/Indonesia/NIHRD17109/2017	EPI_ISL_281682	2.3.2.1c	Human	2017-09-08	Indonesia	Asia	H5N1
A/Alberta/01/2014	EPI_ISL_154130	2.3.2.1c	Human	2014-01-03	Canada	North America	H5N1
A/swine/Zhejiang/SW57/2015	EPI_ISL_393329	2.3.2.1c	Swine	2015-01	China	Asia	H5N1
A/tiger/Yunnan/tig1508/2015	EPI_ISL_221722	2.3.2.1c	Feline	2015-08-12	China	Asia	H5N1
A/lion/Hubei/1-2/2016	EPI_ISL_244744	2.3.2.1c	Feline	2016-04-12	China	Asia	H5N1
A/chicken/East_Java/Av700/2016	EPI_ISL_391469	2.3.2.1c	Gallus gallus	2016-01-16	Indonesia	Asia	H5N1
A/duck/Vietnam/LBM360c1-4-1/2013	EPI_ISL_173146	2.3.2.1c	Anas platyrhynchos	2013-02-06	Vietnam	Asia	H5N6
A/Xinjiang/1/2009	EPI_ISL_73313	2.3.4	Human	2009-01-10	China	Asia	H5N1
A/Shandong/1/2009	EPI_ISL_73312	2.3.4	Human	2009-01-05	China	Asia	H5N1
A/Hunan/1/2008	EPI_ISL_73303	2.3.4	Human	2008-01-16	China	Asia	H5N1
A/swine/Jiangsu/2/2009	EPI_ISL_144532	2.3.4	Swine	2009-01	China	Asia	H5N1
A/equine/China/67/2010	EPI_ISL_16837243	2.3.4	Equine	2010-01-25	China	Asia	H5N1
A/chicken/Tibet/6/2008	EPI_ISL_78001	2.3.4	Chicken	2008	China	Asia	H5N1
A/Vietnam/UT36282/2010	EPI_ISL_174484	2.3.4.1	Human	2010-03-27	Vietnam	Asia	H5N1
A/Vietnam/UT36250-1/2010	EPI_ISL_173687	2.3.4.2	Human	2010-03-05	Vietnam	Asia	H5N1
A/chicken/Yangon/254/2010	EPI_ISL_123956	2.3.4.2	Chicken	2010-02	Myanmar	Asia	H5N1
A/Guangxi/1/2008	EPI_ISL_73305	2.3.4.3	Human	2008-02-12	China	Asia	H5N1
A/duck/Jiangxi/120/2011	EPI_ISL_369825	2.3.4	Duck	2011-12-03	China	Asia	H5N1
A/Chile/25945/2023	EPI_ISL_17468386	2.3.4.4b	Human	2023-03-24	Chile	South America	H5N1
A/Mink/Spain/3691-3_22VIR10586-9/2022	EPI_ISL_15878542	2.3.4.4b	Mink	2022-10-18	Spain	Europe	H5N1
A/feline/South Korea/SNU-02/2023	EPI_ISL_18102701	2.3.4.4b	Feline	2023-07-04	Korea	Asia	H5N1
A/harbor seal/Maine/22-025072-002-original/2022	EPI_ISL_16632542	2.3.4.4b	Seal	2022-07-15	United States	North America	H5N1
A/lesser black-backed gull /Sweden/SVA230509SZ0608/FB001430/AB-2023	EPI_ISL_17699034	2.3.4.4b	Larus fuscus	2023-05-07	Sweden	Europe	H5N1
A/dairy cow/Texas/24_009367-014/2024	EPI_ISL_19094623	2.3.4.4b	Dairy cow	2024-03-25	United States	North America	H5N1
A/dairy cow/South Dakota/24_010354-009-300/2024	EPI_ISL_19151390	2.3.4.4b	Dairy cow	2024-04-05	United States	North America	H5N1
A/Jiangsu/NJ210/2023	EPI_ISL_17075759	2.3.4.4b	Human	2023-02-10	China	Asia	H5N1
A/peregrine falcon/Sweden/SVA221012SZ0381/FB004075/N-2022	EPI_ISL_15839844	2.3.4.4b	Falco peregrinus	2022-09-27	Sweden	Europe	H5N1
A/CastillaLaMancha/3739/2022	EPI_ISL_15542438	2.3.4.4b	Human	2022-09-23	Spain	Europe	H5N1
A/CastillaLaMancha/3869/2022	EPI_ISL_16813290	2.3.4.4b	Human	2022-10-13	Spain	Europe	H5N1
A/Mink/Spain/3691-10_22VIR10586-11/2022	EPI_ISL_15878540	2.3.4.4b	Mink	2022-10-18	Spain	Europe	H5N1
A/England/232780677/2023	EPI_ISL_18161874	2.3.4.4b	Human	2023-07-07	United Kingdom	Europe	H5N1
A/red fox/Northern Ireland/22191/2023	EPI_ISL_18226744	2.3.4.4b	Canine	2023-07-26	United Kingdom	Europe	H5N1
A/American wigeon/Washington/196340/2015	EPI_ISL_206440	2.3.4.4c	Anas americana	2015-01-02	United States	North America	H5N1
A/Anhui/33163/2016	EPI_ISL_284651	2.3.4.4	Human	2016-04-29	China	Asia	H5N6
A/Chicken/Viet Nam/AI-1606/2016	EPI_ISL_4031450	2.3.4.4	Chicken	2016-12-30	Vietnam	Asia	H5N6
A/muscovy duck/Vietnam/LBM818/2015	EPI_ISL_230758	2.3.4.4	Cairina moschata	2015-11-10	Vietnam	Asia	H5N6
A/duck/Guangdong/04.23 DGQTXC236-P/2015(H5N6)	EPI_ISL_199290	2.3.4.4	Duck	2015-04-23	China	Asia	H5N6
A/ Guangdong /ZQ874/2015（H5N6）	EPI_ISL_206569	2.3.4.4	Human	2015-12-31	China	Asia	H5N6
A/swine/Guangdong/2/2014	EPI_ISL_196101	2.3.4.4	Swine	2014-06-18	China	Asia	H5N6
A/Guangdong/lgf/2021	EPI_ISL_16208999	2.3.4.4b	Human	2021-09-19	China	Asia	H5N6
A/Perigrine falcon/Netherlands/18003274-001/2018	EPI_ISL_332439	2.3.4.4b	Falcon	2018-03-01	Netherlands	Europe	H5N6
A/swine/Guangdong/G3/2015	EPI_ISL_266596	2.3.4.4b	Swine	2015-03-26	China	Asia	H5N6
A/Shenzhen/TH003/2016(H5N6)	EPI_ISL_207048	2.3.4.4e	Human	2016-01-15	China	Asia	H5N6
A/goose/Fujian/11.23_FZHX0009-O/2017	EPI_ISL_697211	2.3.4.4e	Goose	2017-11-23	China	Asia	H5N6
A/feline/Guangdong/2/2015	EPI_ISL_221721	2.3.4.4e	Feline	2015-01-13	China	Asia	H5N6
A/duck/Vietnam/HN5147/2018	EPI_ISL_17768811	2.3.4.4g	Duck	2018-12-05	Vietnam	Asia	H5N6
A/Harris Hawk/Hungary/120/2017	EPI_ISL_255191	2.3.4.4b	Parabuteo	2017-01-02	Hungary	Europe	H5N8
A/seal/England/AVP-031141/2020	EPI_ISL_2081528	2.3.4.4b	Seal	2020-12-08	United Kingdom	Europe	H5N8
A/seal/Germany-SH/AI05377/2021	EPI_ISL_4805852	2.3.4.4b	Seal	2021-08-18	Germany	Europe	H5N8
A/seal/Germany-SH/AI05379/2021	EPI_ISL_4805936	2.3.4.4b	Seal	2021-08-19	Germany	Europe	H5N8
A/seal/Germany-SH/AI05373/2021	EPI_ISL_4804850	2.3.4.4b	Seal	2021-08-15	Germany	Europe	H5N8
A/goose/Yangzhou/0420/2014	EPI_ISL_206492	2.3.4.4b	Goose	2014-04-20	China	Asia	H5N8
A/ostrich/South Africa/002/2017	EPI_ISL_369366	2.3.4.4b	Ostrich	2017-10-26	South Africa	Africa	H5N8
A/mink/Eastern China/032/2018	EPI_ISL_502202	2.3.4.4h	Mink	2018-01-10	China	Asia	H5N6
A/peregrine falcon/Washington/196426/2014	EPI_ISL_206445	2.3.4.4c	Falco peregrinus	2014-12-29	United States	North America	H5N8
A/tiger/Yunnan/tig1404/2014	EPI_ISL_221723	2.3.4.4	Feline	2014-04-08	China	Asia	H5N1
A/Changsha/1/2022	EPI_ISL_16466440	2.3.4.4b	Human	2022-11-11	China	Asia	H5N6
A/Guangxi/55726/2016	EPI_ISL_240704	2.3.4.4g	Human	2016-11-24	China	Asia	H5N6
A/Gadwall/Ningxia/487-38/2015	EPI_ISL_295520	2.3.4.4	Anas strepera	2015-11-11	China	Asia	H5N6
A/cat/Zhejiang/C2/2016	EPI_ISL_278205	2.3.4.4e	Feline	2016-01-12	China	Asia	H5N6
A/Fujian/2/2024(H5N6)	EPI_ISL_19145644	2.3.4.4h	Human	2024-05-14	China	Asia	H5N6
A/Guangxi/13486/2017	EPI_ISL_337280	2.3.4.4h	Human	2017-11-17	China	Asia	H5N6
A/Guangxi/32797/2018	EPI_ISL_337276	2.3.4.4h	Human	2018-10-25	China	Asia	H5N6
A/GX-hechi/01/2021	EPI_ISL_3770721	2.3.4.4h	Human	2021-02-27	China	Asia	H5N6
A/duck/China/FJ1914/2019	EPI_ISL_6795265	2.3.4.4h	Duck	2019-02	China	Asia	H5N6
A/mink/China/183/2019	EPI_ISL_14174437	2.3.4.4h	Mink	2019-08-18	China	Asia	H5N6
A/mink/Eastern China/571/2018	EPI_ISL_502208	2.3.4.4h	Mink	2018-06-13	China	Asia	H5N6
A/Guizhou/1/2013	EPI_ISL_135216	2.3.4.2	Human	2013-02-08	China	Asia	H5N1
