# Supplementary material for: Dominant substitutions underlying the antigenic evolution of H5 influenza virus
Source: Research Square preprint supplement (doi:10.21203/rs.3.rs-6040842/v1), 2025-02-26
Supplement: Supplementary file 4 [file 510b91e99e21ae9e431cab73.xlsx]

## Sheet: genetic_distance_matrix
Strain_Name	EPI_ISL_1254	VI08|7.1	VI04|1	CA07|1.1	CA13|1.1.1	HN02|2.1	IN05|2.1.3.2	IN11|2.1.3.2a	IN06|2.2	EG10|2.2.1	EG08|2.2.1.1	EG14|2.2.1.2	HK07|2.3.2.1	HK10|2.3.2.1b	VI12|2.3.2.1c	GY06|4	BA18|2.3.2.1a	CR21|2.3.4.4b	HY16|2.3.4.4e	SI14|2.3.4.4b	GD18|2.3.4.4h	VI20|2.3.4.4g	WA14|2.3.4.4c	AS20|2.3.4.4b	EPI_ISL_164600	EPI_ISL_98856	EPI_ISL_98738	EPI_ISL_268	EPI_ISL_4046	EPI_ISL_166660	EPI_ISL_67998	EPI_ISL_5773	EPI_ISL_5769	EPI_ISL_891209	EPI_ISL_173687	EPI_ISL_10049	EPI_ISL_11384	EPI_ISL_11872	EPI_ISL_79681	EPI_ISL_343382	EPI_ISL_281682	EPI_ISL_89366	EPI_ISL_96894	EPI_ISL_31745	EPI_ISL_31743	EPI_ISL_17468386	EPI_ISL_262572	EPI_ISL_165438	EPI_ISL_17075759
EPI_ISL_1254	0	0.09330985915492962	0.0369718309859155	0.04929577464788737	0.06161971830985913	0.033450704225352124	0.04401408450704225	0.059859154929577496	0.040492957746478875	0.052816901408450745	0.073943661971831	0.05809859154929575	0.059859154929577496	0.08098591549295775	0.0880281690140845	0.03873239436619713	0.08274647887323938	0.08978873239436624	0.08978873239436624	0.08098591549295775	0.09859154929577463	0.09507042253521125	0.0880281690140845	0.08626760563380287	0.059859154929577496	0.059859154929577496	0.05809859154929575	0.035211267605633756	0.035211267605633756	0.05457746478873238	0.021126760563380254	0.047535211267605626	0.04929577464788737	0.08978873239436624	0.06338028169014087	0.03873239436619713	0.052816901408450745	0.04929577464788737	0.047535211267605626	0.05457746478873238	0.09330985915492962	0.052816901408450745	0.0651408450704225	0.052816901408450745	0.05633802816901412	0.0880281690140845	0.05809859154929575	0.08450704225352113	0.09330985915492962
VI08|7.1	0.09330985915492962	0	0.09859154929577463	0.10035211267605637	0.11267605633802813	0.09507042253521125	0.09330985915492962	0.10387323943661975	0.09507042253521125	0.102112676056338	0.102112676056338	0.10563380281690138	0.10739436619718312	0.1161971830985915	0.11971830985915488	0.09154929577464788	0.11795774647887325	0.13204225352112675	0.1338028169014085	0.125	0.14084507042253525	0.13732394366197187	0.13028169014084512	0.12852112676056338	0.11267605633802813	0.10387323943661975	0.11267605633802813	0.09330985915492962	0.096830985915493	0.1109154929577465	0.09330985915492962	0.096830985915493	0.09859154929577463	0.12676056338028174	0.10563380281690138	0.09859154929577463	0.10563380281690138	0.096830985915493	0.096830985915493	0.102112676056338	0.12852112676056338	0.10387323943661975	0.1161971830985915	0.10387323943661975	0.10563380281690138	0.13204225352112675	0.10563380281690138	0.12147887323943662	0.1338028169014085
VI04|1	0.0369718309859155	0.09859154929577463	0	0.015845070422535246	0.03169014084507038	0.02464788732394363	0.033450704225352124	0.04929577464788737	0.03169014084507038	0.04401408450704225	0.05633802816901412	0.04929577464788737	0.045774647887323994	0.0651408450704225	0.07042253521126762	0.047535211267605626	0.0651408450704225	0.08274647887323938	0.08450704225352113	0.07218309859154926	0.09507042253521125	0.08450704225352113	0.079225352112676	0.07746478873239437	0.029929577464788748	0.04929577464788737	0.026408450704225372	0.017605633802816878	0.0017605633802817433	0.02464788732394363	0.028169014084507005	0.0369718309859155	0.035211267605633756	0.073943661971831	0.045774647887323994	0.010563380281690127	0.04401408450704225	0.0369718309859155	0.03169014084507038	0.04401408450704225	0.07218309859154926	0.040492957746478875	0.04929577464788737	0.040492957746478875	0.04225352112676062	0.08098591549295775	0.047535211267605626	0.06690140845070425	0.08450704225352113
CA07|1.1	0.04929577464788737	0.10035211267605637	0.015845070422535246	0	0.02464788732394363	0.035211267605633756	0.04225352112676062	0.05809859154929575	0.040492957746478875	0.051056338028169	0.059859154929577496	0.05633802816901412	0.052816901408450745	0.0651408450704225	0.073943661971831	0.05633802816901412	0.06866197183098588	0.079225352112676	0.08450704225352113	0.07218309859154926	0.10035211267605637	0.08450704225352113	0.079225352112676	0.07570422535211263	0.022887323943661997	0.05809859154929575	0.021126760563380254	0.02464788732394363	0.014084507042253502	0.021126760563380254	0.0369718309859155	0.045774647887323994	0.04225352112676062	0.07570422535211263	0.052816901408450745	0.021126760563380254	0.051056338028169	0.04401408450704225	0.03873239436619713	0.047535211267605626	0.07746478873239437	0.051056338028169	0.052816901408450745	0.045774647887323994	0.047535211267605626	0.07746478873239437	0.05457746478873238	0.06866197183098588	0.08274647887323938
CA13|1.1.1	0.06161971830985913	0.11267605633802813	0.03169014084507038	0.02464788732394363	0	0.04929577464788737	0.05457746478873238	0.07042253521126762	0.052816901408450745	0.06338028169014087	0.07218309859154926	0.06690140845070425	0.06338028169014087	0.07218309859154926	0.08274647887323938	0.06866197183098588	0.08098591549295775	0.09154929577464788	0.09859154929577463	0.08274647887323938	0.10915492957746475	0.09859154929577463	0.09330985915492962	0.0880281690140845	0.015845070422535246	0.07042253521126762	0.028169014084507005	0.0369718309859155	0.029929577464788748	0.017605633802816878	0.051056338028169	0.05809859154929575	0.05633802816901412	0.08274647887323938	0.0651408450704225	0.0369718309859155	0.06338028169014087	0.059859154929577496	0.051056338028169	0.059859154929577496	0.08450704225352113	0.06338028169014087	0.06338028169014087	0.059859154929577496	0.06161971830985913	0.08978873239436624	0.0651408450704225	0.08098591549295775	0.09507042253521125
HN02|2.1	0.033450704225352124	0.09507042253521125	0.02464788732394363	0.035211267605633756	0.04929577464788737	0	0.01936619718309862	0.0369718309859155	0.021126760563380254	0.033450704225352124	0.052816901408450745	0.03873239436619713	0.04225352112676062	0.0651408450704225	0.07042253521126762	0.045774647887323994	0.0651408450704225	0.08098591549295775	0.07746478873239437	0.06866197183098588	0.0880281690140845	0.079225352112676	0.07746478873239437	0.07570422535211263	0.047535211267605626	0.0369718309859155	0.04401408450704225	0.017605633802816878	0.022887323943661997	0.040492957746478875	0.022887323943661997	0.022887323943661997	0.02464788732394363	0.07570422535211263	0.045774647887323994	0.026408450704225372	0.033450704225352124	0.033450704225352124	0.028169014084507005	0.03169014084507038	0.079225352112676	0.0369718309859155	0.04929577464788737	0.0369718309859155	0.03873239436619713	0.079225352112676	0.03873239436619713	0.06690140845070425	0.08098591549295775
IN05|2.1.3.2	0.04401408450704225	0.09330985915492962	0.033450704225352124	0.04225352112676062	0.05457746478873238	0.01936619718309862	0	0.01936619718309862	0.035211267605633756	0.047535211267605626	0.05633802816901412	0.047535211267605626	0.04929577464788737	0.07218309859154926	0.073943661971831	0.05633802816901412	0.06866197183098588	0.08098591549295775	0.08626760563380287	0.07570422535211263	0.09507042253521125	0.08626760563380287	0.0880281690140845	0.07570422535211263	0.052816901408450745	0.01936619718309862	0.051056338028169	0.03169014084507038	0.03169014084507038	0.047535211267605626	0.0369718309859155	0.007042253521126751	0.028169014084507005	0.079225352112676	0.051056338028169	0.035211267605633756	0.047535211267605626	0.045774647887323994	0.0369718309859155	0.021126760563380254	0.079225352112676	0.04929577464788737	0.05633802816901412	0.045774647887323994	0.047535211267605626	0.079225352112676	0.047535211267605626	0.07042253521126762	0.08098591549295775
IN11|2.1.3.2a	0.059859154929577496	0.10387323943661975	0.04929577464788737	0.05809859154929575	0.07042253521126762	0.0369718309859155	0.01936619718309862	0	0.052816901408450745	0.0651408450704225	0.07218309859154926	0.0651408450704225	0.06161971830985913	0.08450704225352113	0.08274647887323938	0.06866197183098588	0.079225352112676	0.0880281690140845	0.09154929577464788	0.08098591549295775	0.10035211267605637	0.09154929577464788	0.09330985915492962	0.08274647887323938	0.06690140845070425	0.0017605633802817433	0.0651408450704225	0.04929577464788737	0.047535211267605626	0.06338028169014087	0.052816901408450745	0.022887323943661997	0.047535211267605626	0.09154929577464788	0.06161971830985913	0.051056338028169	0.0651408450704225	0.06338028169014087	0.05457746478873238	0.040492957746478875	0.08626760563380287	0.0651408450704225	0.0651408450704225	0.06338028169014087	0.0651408450704225	0.08626760563380287	0.0651408450704225	0.079225352112676	0.0880281690140845
IN06|2.2	0.040492957746478875	0.09507042253521125	0.03169014084507038	0.040492957746478875	0.052816901408450745	0.021126760563380254	0.035211267605633756	0.052816901408450745	0	0.014084507042253502	0.035211267605633756	0.017605633802816878	0.045774647887323994	0.06690140845070425	0.06866197183098588	0.05809859154929575	0.0651408450704225	0.08098591549295775	0.073943661971831	0.06690140845070425	0.08626760563380287	0.08098591549295775	0.07570422535211263	0.07570422535211263	0.04929577464788737	0.052816901408450745	0.051056338028169	0.026408450704225372	0.029929577464788748	0.047535211267605626	0.03169014084507038	0.03873239436619713	0.0369718309859155	0.073943661971831	0.04929577464788737	0.03169014084507038	0.014084507042253502	0.017605633802816878	0.008802816901408494	0.04401408450704225	0.079225352112676	0.017605633802816878	0.052816901408450745	0.017605633802816878	0.021126760563380254	0.079225352112676	0.017605633802816878	0.06690140845070425	0.08098591549295775
EG10|2.2.1	0.052816901408450745	0.102112676056338	0.04401408450704225	0.051056338028169	0.06338028169014087	0.033450704225352124	0.047535211267605626	0.0651408450704225	0.014084507042253502	0	0.035211267605633756	0.017605633802816878	0.05457746478873238	0.07218309859154926	0.07570422535211263	0.06866197183098588	0.07570422535211263	0.09507042253521125	0.08274647887323938	0.08098591549295775	0.096830985915493	0.09507042253521125	0.08978873239436624	0.08978873239436624	0.059859154929577496	0.0651408450704225	0.06161971830985913	0.0369718309859155	0.04225352112676062	0.059859154929577496	0.04401408450704225	0.051056338028169	0.047535211267605626	0.08274647887323938	0.059859154929577496	0.04225352112676062	0.014084507042253502	0.021126760563380254	0.01936619718309862	0.05457746478873238	0.08978873239436624	0.03169014084507038	0.06161971830985913	0.021126760563380254	0.02464788732394363	0.09330985915492962	0.021126760563380254	0.073943661971831	0.09154929577464788
EG08|2.2.1.1	0.073943661971831	0.102112676056338	0.05633802816901412	0.059859154929577496	0.07218309859154926	0.052816901408450745	0.05633802816901412	0.07218309859154926	0.035211267605633756	0.035211267605633756	0	0.045774647887323994	0.06338028169014087	0.08098591549295775	0.08626760563380287	0.08098591549295775	0.08274647887323938	0.09859154929577463	0.09507042253521125	0.08626760563380287	0.11267605633802813	0.09859154929577463	0.096830985915493	0.09330985915492962	0.06866197183098588	0.07218309859154926	0.07042253521126762	0.052816901408450745	0.05457746478873238	0.06866197183098588	0.059859154929577496	0.06161971830985913	0.06161971830985913	0.0880281690140845	0.0651408450704225	0.05633802816901412	0.0369718309859155	0.04225352112676062	0.0369718309859155	0.06338028169014087	0.09330985915492962	0.051056338028169	0.06690140845070425	0.04401408450704225	0.04401408450704225	0.096830985915493	0.04401408450704225	0.08274647887323938	0.09859154929577463
EG14|2.2.1.2	0.05809859154929575	0.10563380281690138	0.04929577464788737	0.05633802816901412	0.06690140845070425	0.03873239436619713	0.047535211267605626	0.0651408450704225	0.017605633802816878	0.017605633802816878	0.045774647887323994	0	0.05633802816901412	0.07570422535211263	0.079225352112676	0.073943661971831	0.07570422535211263	0.09330985915492962	0.08450704225352113	0.079225352112676	0.096830985915493	0.096830985915493	0.09154929577464788	0.0880281690140845	0.0651408450704225	0.0651408450704225	0.06690140845070425	0.04225352112676062	0.047535211267605626	0.06338028169014087	0.04929577464788737	0.052816901408450745	0.05457746478873238	0.08274647887323938	0.06338028169014087	0.045774647887323994	0.028169014084507005	0.03169014084507038	0.026408450704225372	0.05633802816901412	0.08978873239436624	0.033450704225352124	0.06338028169014087	0.029929577464788748	0.033450704225352124	0.09154929577464788	0.0035211267605633756	0.07746478873239437	0.09330985915492962
HK07|2.3.2.1	0.059859154929577496	0.10739436619718312	0.045774647887323994	0.052816901408450745	0.06338028169014087	0.04225352112676062	0.04929577464788737	0.06161971830985913	0.045774647887323994	0.05457746478873238	0.06338028169014087	0.05633802816901412	0	0.029929577464788748	0.033450704225352124	0.07570422535211263	0.029929577464788748	0.079225352112676	0.08098591549295775	0.06866197183098588	0.08626760563380287	0.08274647887323938	0.07746478873239437	0.073943661971831	0.06338028169014087	0.06161971830985913	0.0651408450704225	0.0369718309859155	0.04401408450704225	0.06161971830985913	0.05457746478873238	0.05457746478873238	0.05457746478873238	0.04225352112676062	0.052816901408450745	0.04929577464788737	0.051056338028169	0.05457746478873238	0.051056338028169	0.06161971830985913	0.047535211267605626	0.059859154929577496	0.01232394366197187	0.05809859154929575	0.059859154929577496	0.08098591549295775	0.05457746478873238	0.029929577464788748	0.08274647887323938
HK10|2.3.2.1b	0.08098591549295775	0.1161971830985915	0.0651408450704225	0.0651408450704225	0.07218309859154926	0.0651408450704225	0.07218309859154926	0.08450704225352113	0.06690140845070425	0.07218309859154926	0.08098591549295775	0.07570422535211263	0.029929577464788748	0	0.040492957746478875	0.08978873239436624	0.045774647887323994	0.09154929577464788	0.0880281690140845	0.08450704225352113	0.096830985915493	0.08978873239436624	0.08274647887323938	0.08626760563380287	0.07218309859154926	0.08450704225352113	0.07746478873239437	0.059859154929577496	0.06338028169014087	0.07042253521126762	0.073943661971831	0.07746478873239437	0.07746478873239437	0.015845070422535246	0.07042253521126762	0.06866197183098588	0.07042253521126762	0.073943661971831	0.07218309859154926	0.08098591549295775	0.052816901408450745	0.07746478873239437	0.021126760563380254	0.07746478873239437	0.079225352112676	0.09330985915492962	0.073943661971831	0.04401408450704225	0.09154929577464788
VI12|2.3.2.1c	0.0880281690140845	0.11971830985915488	0.07042253521126762	0.073943661971831	0.08274647887323938	0.07042253521126762	0.073943661971831	0.08274647887323938	0.06866197183098588	0.07570422535211263	0.08626760563380287	0.079225352112676	0.033450704225352124	0.040492957746478875	0	0.10035211267605637	0.026408450704225372	0.0880281690140845	0.09154929577464788	0.08274647887323938	0.09330985915492962	0.09154929577464788	0.08274647887323938	0.08274647887323938	0.079225352112676	0.08274647887323938	0.0880281690140845	0.0651408450704225	0.06866197183098588	0.08098591549295775	0.08098591549295775	0.08098591549295775	0.07218309859154926	0.05633802816901412	0.06866197183098588	0.073943661971831	0.06866197183098588	0.073943661971831	0.073943661971831	0.08626760563380287	0.026408450704225372	0.07746478873239437	0.0369718309859155	0.07570422535211263	0.07746478873239437	0.08978873239436624	0.07746478873239437	0.017605633802816878	0.08978873239436624
GY06|4	0.03873239436619713	0.09154929577464788	0.047535211267605626	0.05633802816901412	0.06866197183098588	0.045774647887323994	0.05633802816901412	0.06866197183098588	0.05809859154929575	0.06866197183098588	0.08098591549295775	0.073943661971831	0.07570422535211263	0.08978873239436624	0.10035211267605637	0	0.09507042253521125	0.102112676056338	0.10563380281690138	0.09507042253521125	0.11971830985915488	0.10563380281690138	0.09330985915492962	0.09859154929577463	0.06690140845070425	0.06866197183098588	0.0651408450704225	0.047535211267605626	0.045774647887323994	0.059859154929577496	0.033450704225352124	0.059859154929577496	0.059859154929577496	0.09859154929577463	0.07042253521126762	0.051056338028169	0.07042253521126762	0.059859154929577496	0.06338028169014087	0.06338028169014087	0.096830985915493	0.06690140845070425	0.07746478873239437	0.07042253521126762	0.07218309859154926	0.10035211267605637	0.07218309859154926	0.09507042253521125	0.10563380281690138
BA18|2.3.2.1a	0.08274647887323938	0.11795774647887325	0.0651408450704225	0.06866197183098588	0.08098591549295775	0.0651408450704225	0.06866197183098588	0.079225352112676	0.0651408450704225	0.07570422535211263	0.08274647887323938	0.07570422535211263	0.029929577464788748	0.045774647887323994	0.026408450704225372	0.09507042253521125	0	0.08450704225352113	0.08626760563380287	0.07570422535211263	0.08978873239436624	0.0880281690140845	0.07746478873239437	0.079225352112676	0.07746478873239437	0.079225352112676	0.08274647887323938	0.059859154929577496	0.06338028169014087	0.07570422535211263	0.07570422535211263	0.07570422535211263	0.0651408450704225	0.059859154929577496	0.06338028169014087	0.06866197183098588	0.06866197183098588	0.07042253521126762	0.07042253521126762	0.08098591549295775	0.03873239436619713	0.07570422535211263	0.035211267605633756	0.07570422535211263	0.07746478873239437	0.0880281690140845	0.073943661971831	0.022887323943661997	0.08978873239436624
CR21|2.3.4.4b	0.08978873239436624	0.13204225352112675	0.08274647887323938	0.079225352112676	0.09154929577464788	0.08098591549295775	0.08098591549295775	0.0880281690140845	0.08098591549295775	0.09507042253521125	0.09859154929577463	0.09330985915492962	0.079225352112676	0.09154929577464788	0.0880281690140845	0.102112676056338	0.08450704225352113	0	0.051056338028169	0.033450704225352124	0.06866197183098588	0.051056338028169	0.04401408450704225	0.005281690140845119	0.08274647887323938	0.0880281690140845	0.09154929577464788	0.07746478873239437	0.08098591549295775	0.0880281690140845	0.079225352112676	0.08274647887323938	0.08978873239436624	0.08978873239436624	0.06866197183098588	0.08274647887323938	0.09154929577464788	0.09154929577464788	0.08978873239436624	0.09154929577464788	0.09859154929577463	0.08626760563380287	0.07746478873239437	0.09330985915492962	0.09507042253521125	0.005281690140845119	0.09154929577464788	0.08626760563380287	0.017605633802816878
HY16|2.3.4.4e	0.08978873239436624	0.1338028169014085	0.08450704225352113	0.08450704225352113	0.09859154929577463	0.07746478873239437	0.08626760563380287	0.09154929577464788	0.073943661971831	0.08274647887323938	0.09507042253521125	0.08450704225352113	0.08098591549295775	0.0880281690140845	0.09154929577464788	0.10563380281690138	0.08626760563380287	0.051056338028169	0	0.035211267605633756	0.04929577464788737	0.03169014084507038	0.035211267605633756	0.045774647887323994	0.09330985915492962	0.09154929577464788	0.096830985915493	0.079225352112676	0.08274647887323938	0.09330985915492962	0.079225352112676	0.08626760563380287	0.08978873239436624	0.0880281690140845	0.06866197183098588	0.08450704225352113	0.08626760563380287	0.08626760563380287	0.08274647887323938	0.09507042253521125	0.09859154929577463	0.0880281690140845	0.079225352112676	0.08978873239436624	0.09154929577464788	0.05633802816901412	0.08626760563380287	0.0880281690140845	0.05633802816901412
SI14|2.3.4.4b	0.08098591549295775	0.125	0.07218309859154926	0.07218309859154926	0.08274647887323938	0.06866197183098588	0.07570422535211263	0.08098591549295775	0.06690140845070425	0.08098591549295775	0.08626760563380287	0.079225352112676	0.06866197183098588	0.08450704225352113	0.08274647887323938	0.09507042253521125	0.07570422535211263	0.033450704225352124	0.035211267605633756	0	0.059859154929577496	0.035211267605633756	0.033450704225352124	0.028169014084507005	0.08098591549295775	0.08098591549295775	0.08450704225352113	0.06690140845070425	0.07042253521126762	0.08098591549295775	0.07218309859154926	0.07570422535211263	0.079225352112676	0.08626760563380287	0.05809859154929575	0.07218309859154926	0.07746478873239437	0.079225352112676	0.07570422535211263	0.08450704225352113	0.08978873239436624	0.079225352112676	0.07042253521126762	0.08098591549295775	0.08274647887323938	0.03873239436619713	0.07746478873239437	0.07570422535211263	0.040492957746478875
GD18|2.3.4.4h	0.09859154929577463	0.14084507042253525	0.09507042253521125	0.10035211267605637	0.10915492957746475	0.0880281690140845	0.09507042253521125	0.10035211267605637	0.08626760563380287	0.096830985915493	0.11267605633802813	0.096830985915493	0.08626760563380287	0.096830985915493	0.09330985915492962	0.11971830985915488	0.08978873239436624	0.06866197183098588	0.04929577464788737	0.059859154929577496	0	0.059859154929577496	0.06161971830985913	0.06338028169014087	0.10739436619718312	0.10035211267605637	0.10739436619718312	0.0880281690140845	0.09330985915492962	0.10739436619718312	0.09330985915492962	0.096830985915493	0.09859154929577463	0.09859154929577463	0.08098591549295775	0.096830985915493	0.096830985915493	0.09859154929577463	0.09507042253521125	0.10563380281690138	0.09859154929577463	0.09859154929577463	0.08626760563380287	0.102112676056338	0.102112676056338	0.07042253521126762	0.096830985915493	0.09330985915492962	0.073943661971831
VI20|2.3.4.4g	0.09507042253521125	0.13732394366197187	0.08450704225352113	0.08450704225352113	0.09859154929577463	0.079225352112676	0.08626760563380287	0.09154929577464788	0.08098591549295775	0.09507042253521125	0.09859154929577463	0.096830985915493	0.08274647887323938	0.08978873239436624	0.09154929577464788	0.10563380281690138	0.0880281690140845	0.051056338028169	0.03169014084507038	0.035211267605633756	0.059859154929577496	0	0.0369718309859155	0.045774647887323994	0.09330985915492962	0.09154929577464788	0.096830985915493	0.08098591549295775	0.08274647887323938	0.09330985915492962	0.08450704225352113	0.08626760563380287	0.0880281690140845	0.08978873239436624	0.07042253521126762	0.08978873239436624	0.09154929577464788	0.09154929577464788	0.0880281690140845	0.09859154929577463	0.096830985915493	0.09507042253521125	0.08098591549295775	0.096830985915493	0.09859154929577463	0.05633802816901412	0.09507042253521125	0.08978873239436624	0.05633802816901412
WA14|2.3.4.4c	0.0880281690140845	0.13028169014084512	0.079225352112676	0.079225352112676	0.09330985915492962	0.07746478873239437	0.0880281690140845	0.09330985915492962	0.07570422535211263	0.08978873239436624	0.096830985915493	0.09154929577464788	0.07746478873239437	0.08274647887323938	0.08274647887323938	0.09330985915492962	0.07746478873239437	0.04401408450704225	0.035211267605633756	0.033450704225352124	0.06161971830985913	0.0369718309859155	0	0.03873239436619713	0.0880281690140845	0.09330985915492962	0.09154929577464788	0.07570422535211263	0.07746478873239437	0.08274647887323938	0.07746478873239437	0.0880281690140845	0.08626760563380287	0.08978873239436624	0.06866197183098588	0.08274647887323938	0.08626760563380287	0.08626760563380287	0.08450704225352113	0.09859154929577463	0.09330985915492962	0.08450704225352113	0.07570422535211263	0.08978873239436624	0.09154929577464788	0.04929577464788737	0.08978873239436624	0.08098591549295775	0.051056338028169
AS20|2.3.4.4b	0.08626760563380287	0.12852112676056338	0.07746478873239437	0.07570422535211263	0.0880281690140845	0.07570422535211263	0.07570422535211263	0.08274647887323938	0.07570422535211263	0.08978873239436624	0.09330985915492962	0.0880281690140845	0.073943661971831	0.08626760563380287	0.08274647887323938	0.09859154929577463	0.079225352112676	0.005281690140845119	0.045774647887323994	0.028169014084507005	0.06338028169014087	0.045774647887323994	0.03873239436619713	0	0.079225352112676	0.08274647887323938	0.0880281690140845	0.07218309859154926	0.07570422535211263	0.08450704225352113	0.07570422535211263	0.07746478873239437	0.08450704225352113	0.08450704225352113	0.06338028169014087	0.07746478873239437	0.08626760563380287	0.08626760563380287	0.08450704225352113	0.08626760563380287	0.09330985915492962	0.08098591549295775	0.07218309859154926	0.0880281690140845	0.08978873239436624	0.010563380281690127	0.08626760563380287	0.08098591549295775	0.01232394366197187
EPI_ISL_164600	0.059859154929577496	0.11267605633802813	0.029929577464788748	0.022887323943661997	0.015845070422535246	0.047535211267605626	0.052816901408450745	0.06690140845070425	0.04929577464788737	0.059859154929577496	0.06866197183098588	0.0651408450704225	0.06338028169014087	0.07218309859154926	0.079225352112676	0.06690140845070425	0.07746478873239437	0.08274647887323938	0.09330985915492962	0.08098591549295775	0.10739436619718312	0.09330985915492962	0.0880281690140845	0.079225352112676	0	0.06690140845070425	0.026408450704225372	0.03873239436619713	0.028169014084507005	0.015845070422535246	0.047535211267605626	0.05633802816901412	0.05457746478873238	0.08274647887323938	0.059859154929577496	0.035211267605633756	0.059859154929577496	0.05633802816901412	0.047535211267605626	0.059859154929577496	0.08098591549295775	0.05457746478873238	0.06161971830985913	0.05633802816901412	0.05809859154929575	0.08098591549295775	0.06338028169014087	0.079225352112676	0.08626760563380287
EPI_ISL_98856	0.059859154929577496	0.10387323943661975	0.04929577464788737	0.05809859154929575	0.07042253521126762	0.0369718309859155	0.01936619718309862	0.0017605633802817433	0.052816901408450745	0.0651408450704225	0.07218309859154926	0.0651408450704225	0.06161971830985913	0.08450704225352113	0.08274647887323938	0.06866197183098588	0.079225352112676	0.0880281690140845	0.09154929577464788	0.08098591549295775	0.10035211267605637	0.09154929577464788	0.09330985915492962	0.08274647887323938	0.06690140845070425	0	0.0651408450704225	0.04929577464788737	0.047535211267605626	0.06338028169014087	0.052816901408450745	0.022887323943661997	0.047535211267605626	0.09154929577464788	0.06161971830985913	0.051056338028169	0.0651408450704225	0.06338028169014087	0.05457746478873238	0.040492957746478875	0.08626760563380287	0.0651408450704225	0.0651408450704225	0.06338028169014087	0.0651408450704225	0.08626760563380287	0.0651408450704225	0.079225352112676	0.0880281690140845
EPI_ISL_98738	0.05809859154929575	0.11267605633802813	0.026408450704225372	0.021126760563380254	0.028169014084507005	0.04401408450704225	0.051056338028169	0.0651408450704225	0.051056338028169	0.06161971830985913	0.07042253521126762	0.06690140845070425	0.0651408450704225	0.07746478873239437	0.0880281690140845	0.0651408450704225	0.08274647887323938	0.09154929577464788	0.096830985915493	0.08450704225352113	0.10739436619718312	0.096830985915493	0.09154929577464788	0.0880281690140845	0.026408450704225372	0.0651408450704225	0	0.03873239436619713	0.02464788732394363	0.021126760563380254	0.045774647887323994	0.05457746478873238	0.05633802816901412	0.08626760563380287	0.0651408450704225	0.028169014084507005	0.06338028169014087	0.059859154929577496	0.051056338028169	0.059859154929577496	0.08978873239436624	0.05809859154929575	0.0651408450704225	0.059859154929577496	0.06161971830985913	0.08978873239436624	0.0651408450704225	0.08274647887323938	0.09154929577464788
EPI_ISL_268	0.035211267605633756	0.09330985915492962	0.017605633802816878	0.02464788732394363	0.0369718309859155	0.017605633802816878	0.03169014084507038	0.04929577464788737	0.026408450704225372	0.0369718309859155	0.052816901408450745	0.04225352112676062	0.0369718309859155	0.059859154929577496	0.0651408450704225	0.047535211267605626	0.059859154929577496	0.07746478873239437	0.079225352112676	0.06690140845070425	0.0880281690140845	0.08098591549295775	0.07570422535211263	0.07218309859154926	0.03873239436619713	0.04929577464788737	0.03873239436619713	0	0.015845070422535246	0.035211267605633756	0.02464788732394363	0.035211267605633756	0.03169014084507038	0.06866197183098588	0.045774647887323994	0.021126760563380254	0.0369718309859155	0.033450704225352124	0.03169014084507038	0.040492957746478875	0.07218309859154926	0.04225352112676062	0.04401408450704225	0.0369718309859155	0.03873239436619713	0.07570422535211263	0.040492957746478875	0.06161971830985913	0.079225352112676
EPI_ISL_4046	0.035211267605633756	0.096830985915493	0.0017605633802817433	0.014084507042253502	0.029929577464788748	0.022887323943661997	0.03169014084507038	0.047535211267605626	0.029929577464788748	0.04225352112676062	0.05457746478873238	0.047535211267605626	0.04401408450704225	0.06338028169014087	0.06866197183098588	0.045774647887323994	0.06338028169014087	0.08098591549295775	0.08274647887323938	0.07042253521126762	0.09330985915492962	0.08274647887323938	0.07746478873239437	0.07570422535211263	0.028169014084507005	0.047535211267605626	0.02464788732394363	0.015845070422535246	0	0.022887323943661997	0.026408450704225372	0.035211267605633756	0.033450704225352124	0.07218309859154926	0.04401408450704225	0.008802816901408494	0.04225352112676062	0.035211267605633756	0.029929577464788748	0.04225352112676062	0.07042253521126762	0.03873239436619713	0.047535211267605626	0.03873239436619713	0.040492957746478875	0.079225352112676	0.045774647887323994	0.0651408450704225	0.08274647887323938
EPI_ISL_166660	0.05457746478873238	0.1109154929577465	0.02464788732394363	0.021126760563380254	0.017605633802816878	0.040492957746478875	0.047535211267605626	0.06338028169014087	0.047535211267605626	0.059859154929577496	0.06866197183098588	0.06338028169014087	0.06161971830985913	0.07042253521126762	0.08098591549295775	0.059859154929577496	0.07570422535211263	0.0880281690140845	0.09330985915492962	0.08098591549295775	0.10739436619718312	0.09330985915492962	0.08274647887323938	0.08450704225352113	0.015845070422535246	0.06338028169014087	0.021126760563380254	0.035211267605633756	0.022887323943661997	0	0.04225352112676062	0.051056338028169	0.052816901408450745	0.079225352112676	0.06161971830985913	0.028169014084507005	0.059859154929577496	0.05633802816901412	0.04929577464788737	0.05809859154929575	0.08274647887323938	0.05809859154929575	0.06161971830985913	0.05633802816901412	0.05809859154929575	0.08626760563380287	0.06161971830985913	0.079225352112676	0.09154929577464788
EPI_ISL_67998	0.021126760563380254	0.09330985915492962	0.028169014084507005	0.0369718309859155	0.051056338028169	0.022887323943661997	0.0369718309859155	0.052816901408450745	0.03169014084507038	0.04401408450704225	0.059859154929577496	0.04929577464788737	0.05457746478873238	0.073943661971831	0.08098591549295775	0.033450704225352124	0.07570422535211263	0.079225352112676	0.079225352112676	0.07218309859154926	0.09330985915492962	0.08450704225352113	0.07746478873239437	0.07570422535211263	0.047535211267605626	0.052816901408450745	0.045774647887323994	0.02464788732394363	0.026408450704225372	0.04225352112676062	0	0.040492957746478875	0.04401408450704225	0.08274647887323938	0.052816901408450745	0.029929577464788748	0.04401408450704225	0.040492957746478875	0.03873239436619713	0.04929577464788737	0.08626760563380287	0.04401408450704225	0.05809859154929575	0.04401408450704225	0.045774647887323994	0.07746478873239437	0.04929577464788737	0.07570422535211263	0.08274647887323938
EPI_ISL_5773	0.047535211267605626	0.096830985915493	0.0369718309859155	0.045774647887323994	0.05809859154929575	0.022887323943661997	0.007042253521126751	0.022887323943661997	0.03873239436619713	0.051056338028169	0.06161971830985913	0.052816901408450745	0.05457746478873238	0.07746478873239437	0.08098591549295775	0.059859154929577496	0.07570422535211263	0.08274647887323938	0.08626760563380287	0.07570422535211263	0.096830985915493	0.08626760563380287	0.0880281690140845	0.07746478873239437	0.05633802816901412	0.022887323943661997	0.05457746478873238	0.035211267605633756	0.035211267605633756	0.051056338028169	0.040492957746478875	0	0.033450704225352124	0.08450704225352113	0.051056338028169	0.03873239436619713	0.051056338028169	0.04929577464788737	0.040492957746478875	0.028169014084507005	0.08626760563380287	0.052816901408450745	0.06161971830985913	0.04929577464788737	0.051056338028169	0.08098591549295775	0.052816901408450745	0.07746478873239437	0.08274647887323938
EPI_ISL_5769	0.04929577464788737	0.09859154929577463	0.035211267605633756	0.04225352112676062	0.05633802816901412	0.02464788732394363	0.028169014084507005	0.047535211267605626	0.0369718309859155	0.047535211267605626	0.06161971830985913	0.05457746478873238	0.05457746478873238	0.07746478873239437	0.07218309859154926	0.059859154929577496	0.0651408450704225	0.08978873239436624	0.08978873239436624	0.079225352112676	0.09859154929577463	0.0880281690140845	0.08626760563380287	0.08450704225352113	0.05457746478873238	0.047535211267605626	0.05633802816901412	0.03169014084507038	0.033450704225352124	0.052816901408450745	0.04401408450704225	0.033450704225352124	0	0.08978873239436624	0.04929577464788737	0.03873239436619713	0.047535211267605626	0.04401408450704225	0.03873239436619713	0.0369718309859155	0.07746478873239437	0.04929577464788737	0.06161971830985913	0.047535211267605626	0.051056338028169	0.0880281690140845	0.052816901408450745	0.06866197183098588	0.08978873239436624
EPI_ISL_891209	0.08978873239436624	0.12676056338028174	0.073943661971831	0.07570422535211263	0.08274647887323938	0.07570422535211263	0.079225352112676	0.09154929577464788	0.073943661971831	0.08274647887323938	0.0880281690140845	0.08274647887323938	0.04225352112676062	0.015845070422535246	0.05633802816901412	0.09859154929577463	0.059859154929577496	0.08978873239436624	0.0880281690140845	0.08626760563380287	0.09859154929577463	0.08978873239436624	0.08978873239436624	0.08450704225352113	0.08274647887323938	0.09154929577464788	0.08626760563380287	0.06866197183098588	0.07218309859154926	0.079225352112676	0.08274647887323938	0.08450704225352113	0.08978873239436624	0	0.079225352112676	0.07570422535211263	0.08098591549295775	0.079225352112676	0.08274647887323938	0.0880281690140845	0.06161971830985913	0.0880281690140845	0.033450704225352124	0.08450704225352113	0.08626760563380287	0.09154929577464788	0.08098591549295775	0.059859154929577496	0.0880281690140845
EPI_ISL_173687	0.06338028169014087	0.10563380281690138	0.045774647887323994	0.052816901408450745	0.0651408450704225	0.045774647887323994	0.051056338028169	0.06161971830985913	0.04929577464788737	0.059859154929577496	0.0651408450704225	0.06338028169014087	0.052816901408450745	0.07042253521126762	0.06866197183098588	0.07042253521126762	0.06338028169014087	0.06866197183098588	0.06866197183098588	0.05809859154929575	0.08098591549295775	0.07042253521126762	0.06866197183098588	0.06338028169014087	0.059859154929577496	0.06161971830985913	0.0651408450704225	0.045774647887323994	0.04401408450704225	0.06161971830985913	0.052816901408450745	0.051056338028169	0.04929577464788737	0.079225352112676	0	0.045774647887323994	0.05809859154929575	0.04929577464788737	0.051056338028169	0.059859154929577496	0.0651408450704225	0.059859154929577496	0.05457746478873238	0.05809859154929575	0.059859154929577496	0.06866197183098588	0.06161971830985913	0.06866197183098588	0.073943661971831
EPI_ISL_10049	0.03873239436619713	0.09859154929577463	0.010563380281690127	0.021126760563380254	0.0369718309859155	0.026408450704225372	0.035211267605633756	0.051056338028169	0.03169014084507038	0.04225352112676062	0.05633802816901412	0.045774647887323994	0.04929577464788737	0.06866197183098588	0.073943661971831	0.051056338028169	0.06866197183098588	0.08274647887323938	0.08450704225352113	0.07218309859154926	0.096830985915493	0.08978873239436624	0.08274647887323938	0.07746478873239437	0.035211267605633756	0.051056338028169	0.028169014084507005	0.021126760563380254	0.008802816901408494	0.028169014084507005	0.029929577464788748	0.03873239436619713	0.03873239436619713	0.07570422535211263	0.045774647887323994	0	0.04401408450704225	0.0369718309859155	0.035211267605633756	0.04225352112676062	0.07570422535211263	0.040492957746478875	0.052816901408450745	0.03873239436619713	0.040492957746478875	0.08098591549295775	0.04401408450704225	0.07042253521126762	0.08274647887323938
EPI_ISL_11384	0.052816901408450745	0.10563380281690138	0.04401408450704225	0.051056338028169	0.06338028169014087	0.033450704225352124	0.047535211267605626	0.0651408450704225	0.014084507042253502	0.014084507042253502	0.0369718309859155	0.028169014084507005	0.051056338028169	0.07042253521126762	0.06866197183098588	0.07042253521126762	0.06866197183098588	0.09154929577464788	0.08626760563380287	0.07746478873239437	0.096830985915493	0.09154929577464788	0.08626760563380287	0.08626760563380287	0.059859154929577496	0.0651408450704225	0.06338028169014087	0.0369718309859155	0.04225352112676062	0.059859154929577496	0.04401408450704225	0.051056338028169	0.047535211267605626	0.08098591549295775	0.05809859154929575	0.04401408450704225	0	0.021126760563380254	0.01936619718309862	0.05457746478873238	0.08274647887323938	0.03169014084507038	0.05809859154929575	0.021126760563380254	0.02464788732394363	0.08978873239436624	0.028169014084507005	0.06690140845070425	0.0880281690140845
EPI_ISL_11872	0.04929577464788737	0.096830985915493	0.0369718309859155	0.04401408450704225	0.059859154929577496	0.033450704225352124	0.045774647887323994	0.06338028169014087	0.017605633802816878	0.021126760563380254	0.04225352112676062	0.03169014084507038	0.05457746478873238	0.073943661971831	0.073943661971831	0.059859154929577496	0.07042253521126762	0.09154929577464788	0.08626760563380287	0.079225352112676	0.09859154929577463	0.09154929577464788	0.08626760563380287	0.08626760563380287	0.05633802816901412	0.06338028169014087	0.059859154929577496	0.033450704225352124	0.035211267605633756	0.05633802816901412	0.040492957746478875	0.04929577464788737	0.04401408450704225	0.079225352112676	0.04929577464788737	0.0369718309859155	0.021126760563380254	0	0.022887323943661997	0.052816901408450745	0.08274647887323938	0.03169014084507038	0.059859154929577496	0.021126760563380254	0.02464788732394363	0.09154929577464788	0.03169014084507038	0.07218309859154926	0.09330985915492962
EPI_ISL_79681	0.047535211267605626	0.096830985915493	0.03169014084507038	0.03873239436619713	0.051056338028169	0.028169014084507005	0.0369718309859155	0.05457746478873238	0.008802816901408494	0.01936619718309862	0.0369718309859155	0.026408450704225372	0.051056338028169	0.07218309859154926	0.073943661971831	0.06338028169014087	0.07042253521126762	0.08978873239436624	0.08274647887323938	0.07570422535211263	0.09507042253521125	0.0880281690140845	0.08450704225352113	0.08450704225352113	0.047535211267605626	0.05457746478873238	0.051056338028169	0.03169014084507038	0.029929577464788748	0.04929577464788737	0.03873239436619713	0.040492957746478875	0.03873239436619713	0.08274647887323938	0.051056338028169	0.035211267605633756	0.01936619718309862	0.022887323943661997	0	0.045774647887323994	0.08098591549295775	0.026408450704225372	0.05809859154929575	0.022887323943661997	0.026408450704225372	0.0880281690140845	0.026408450704225372	0.07218309859154926	0.08978873239436624
EPI_ISL_343382	0.05457746478873238	0.102112676056338	0.04401408450704225	0.047535211267605626	0.059859154929577496	0.03169014084507038	0.021126760563380254	0.040492957746478875	0.04401408450704225	0.05457746478873238	0.06338028169014087	0.05633802816901412	0.06161971830985913	0.08098591549295775	0.08626760563380287	0.06338028169014087	0.08098591549295775	0.09154929577464788	0.09507042253521125	0.08450704225352113	0.10563380281690138	0.09859154929577463	0.09859154929577463	0.08626760563380287	0.059859154929577496	0.040492957746478875	0.059859154929577496	0.040492957746478875	0.04225352112676062	0.05809859154929575	0.04929577464788737	0.028169014084507005	0.0369718309859155	0.0880281690140845	0.059859154929577496	0.04225352112676062	0.05457746478873238	0.052816901408450745	0.045774647887323994	0	0.0880281690140845	0.05809859154929575	0.0651408450704225	0.05457746478873238	0.05633802816901412	0.08978873239436624	0.05633802816901412	0.08274647887323938	0.08978873239436624
EPI_ISL_281682	0.09330985915492962	0.12852112676056338	0.07218309859154926	0.07746478873239437	0.08450704225352113	0.079225352112676	0.079225352112676	0.08626760563380287	0.079225352112676	0.08978873239436624	0.09330985915492962	0.08978873239436624	0.047535211267605626	0.052816901408450745	0.026408450704225372	0.096830985915493	0.03873239436619713	0.09859154929577463	0.09859154929577463	0.08978873239436624	0.09859154929577463	0.096830985915493	0.09330985915492962	0.09330985915492962	0.08098591549295775	0.08626760563380287	0.08978873239436624	0.07218309859154926	0.07042253521126762	0.08274647887323938	0.08626760563380287	0.08626760563380287	0.07746478873239437	0.06161971830985913	0.0651408450704225	0.07570422535211263	0.08274647887323938	0.08274647887323938	0.08098591549295775	0.0880281690140845	0	0.08450704225352113	0.051056338028169	0.08978873239436624	0.09154929577464788	0.096830985915493	0.0880281690140845	0.0369718309859155	0.10035211267605637
EPI_ISL_89366	0.052816901408450745	0.10387323943661975	0.040492957746478875	0.051056338028169	0.06338028169014087	0.0369718309859155	0.04929577464788737	0.0651408450704225	0.017605633802816878	0.03169014084507038	0.051056338028169	0.033450704225352124	0.059859154929577496	0.07746478873239437	0.07746478873239437	0.06690140845070425	0.07570422535211263	0.08626760563380287	0.0880281690140845	0.079225352112676	0.09859154929577463	0.09507042253521125	0.08450704225352113	0.08098591549295775	0.05457746478873238	0.0651408450704225	0.05809859154929575	0.04225352112676062	0.03873239436619713	0.05809859154929575	0.04401408450704225	0.052816901408450745	0.04929577464788737	0.0880281690140845	0.059859154929577496	0.040492957746478875	0.03169014084507038	0.03169014084507038	0.026408450704225372	0.05809859154929575	0.08450704225352113	0	0.06690140845070425	0.03169014084507038	0.035211267605633756	0.08450704225352113	0.033450704225352124	0.07570422535211263	0.08274647887323938
EPI_ISL_96894	0.0651408450704225	0.1161971830985915	0.04929577464788737	0.052816901408450745	0.06338028169014087	0.04929577464788737	0.05633802816901412	0.0651408450704225	0.052816901408450745	0.06161971830985913	0.06690140845070425	0.06338028169014087	0.01232394366197187	0.021126760563380254	0.0369718309859155	0.07746478873239437	0.035211267605633756	0.07746478873239437	0.079225352112676	0.07042253521126762	0.08626760563380287	0.08098591549295775	0.07570422535211263	0.07218309859154926	0.06161971830985913	0.0651408450704225	0.0651408450704225	0.04401408450704225	0.047535211267605626	0.06161971830985913	0.05809859154929575	0.06161971830985913	0.06161971830985913	0.033450704225352124	0.05457746478873238	0.052816901408450745	0.05809859154929575	0.059859154929577496	0.05809859154929575	0.0651408450704225	0.051056338028169	0.06690140845070425	0	0.0651408450704225	0.06690140845070425	0.07746478873239437	0.06161971830985913	0.0369718309859155	0.079225352112676
EPI_ISL_31745	0.052816901408450745	0.10387323943661975	0.040492957746478875	0.045774647887323994	0.059859154929577496	0.0369718309859155	0.045774647887323994	0.06338028169014087	0.017605633802816878	0.021126760563380254	0.04401408450704225	0.029929577464788748	0.05809859154929575	0.07746478873239437	0.07570422535211263	0.07042253521126762	0.07570422535211263	0.09330985915492962	0.08978873239436624	0.08098591549295775	0.102112676056338	0.096830985915493	0.08978873239436624	0.0880281690140845	0.05633802816901412	0.06338028169014087	0.059859154929577496	0.0369718309859155	0.03873239436619713	0.05633802816901412	0.04401408450704225	0.04929577464788737	0.047535211267605626	0.08450704225352113	0.05809859154929575	0.03873239436619713	0.021126760563380254	0.021126760563380254	0.022887323943661997	0.05457746478873238	0.08978873239436624	0.03169014084507038	0.0651408450704225	0	0.0035211267605633756	0.09154929577464788	0.029929577464788748	0.073943661971831	0.08978873239436624
EPI_ISL_31743	0.05633802816901412	0.10563380281690138	0.04225352112676062	0.047535211267605626	0.06161971830985913	0.03873239436619713	0.047535211267605626	0.0651408450704225	0.021126760563380254	0.02464788732394363	0.04401408450704225	0.033450704225352124	0.059859154929577496	0.079225352112676	0.07746478873239437	0.07218309859154926	0.07746478873239437	0.09507042253521125	0.09154929577464788	0.08274647887323938	0.102112676056338	0.09859154929577463	0.09154929577464788	0.08978873239436624	0.05809859154929575	0.0651408450704225	0.06161971830985913	0.03873239436619713	0.040492957746478875	0.05809859154929575	0.045774647887323994	0.051056338028169	0.051056338028169	0.08626760563380287	0.059859154929577496	0.040492957746478875	0.02464788732394363	0.02464788732394363	0.026408450704225372	0.05633802816901412	0.09154929577464788	0.035211267605633756	0.06690140845070425	0.0035211267605633756	0	0.09330985915492962	0.033450704225352124	0.07570422535211263	0.09154929577464788
EPI_ISL_17468386	0.0880281690140845	0.13204225352112675	0.08098591549295775	0.07746478873239437	0.08978873239436624	0.079225352112676	0.079225352112676	0.08626760563380287	0.079225352112676	0.09330985915492962	0.096830985915493	0.09154929577464788	0.08098591549295775	0.09330985915492962	0.08978873239436624	0.10035211267605637	0.0880281690140845	0.005281690140845119	0.05633802816901412	0.03873239436619713	0.07042253521126762	0.05633802816901412	0.04929577464788737	0.010563380281690127	0.08098591549295775	0.08626760563380287	0.08978873239436624	0.07570422535211263	0.079225352112676	0.08626760563380287	0.07746478873239437	0.08098591549295775	0.0880281690140845	0.09154929577464788	0.06866197183098588	0.08098591549295775	0.08978873239436624	0.09154929577464788	0.0880281690140845	0.08978873239436624	0.096830985915493	0.08450704225352113	0.07746478873239437	0.09154929577464788	0.09330985915492962	0	0.08978873239436624	0.0880281690140845	0.015845070422535246
EPI_ISL_262572	0.05809859154929575	0.10563380281690138	0.047535211267605626	0.05457746478873238	0.0651408450704225	0.03873239436619713	0.047535211267605626	0.0651408450704225	0.017605633802816878	0.021126760563380254	0.04401408450704225	0.0035211267605633756	0.05457746478873238	0.073943661971831	0.07746478873239437	0.07218309859154926	0.073943661971831	0.09154929577464788	0.08626760563380287	0.07746478873239437	0.096830985915493	0.09507042253521125	0.08978873239436624	0.08626760563380287	0.06338028169014087	0.0651408450704225	0.0651408450704225	0.040492957746478875	0.045774647887323994	0.06161971830985913	0.04929577464788737	0.052816901408450745	0.052816901408450745	0.08098591549295775	0.06161971830985913	0.04401408450704225	0.028169014084507005	0.03169014084507038	0.026408450704225372	0.05633802816901412	0.0880281690140845	0.033450704225352124	0.06161971830985913	0.029929577464788748	0.033450704225352124	0.08978873239436624	0	0.07570422535211263	0.09154929577464788
EPI_ISL_165438	0.08450704225352113	0.12147887323943662	0.06690140845070425	0.06866197183098588	0.08098591549295775	0.06690140845070425	0.07042253521126762	0.079225352112676	0.06690140845070425	0.073943661971831	0.08274647887323938	0.07746478873239437	0.029929577464788748	0.04401408450704225	0.017605633802816878	0.09507042253521125	0.022887323943661997	0.08626760563380287	0.0880281690140845	0.07570422535211263	0.09330985915492962	0.08978873239436624	0.08098591549295775	0.08098591549295775	0.079225352112676	0.079225352112676	0.08274647887323938	0.06161971830985913	0.0651408450704225	0.079225352112676	0.07570422535211263	0.07746478873239437	0.06866197183098588	0.059859154929577496	0.06866197183098588	0.07042253521126762	0.06690140845070425	0.07218309859154926	0.07218309859154926	0.08274647887323938	0.0369718309859155	0.07570422535211263	0.0369718309859155	0.073943661971831	0.07570422535211263	0.0880281690140845	0.07570422535211263	0	0.0880281690140845
EPI_ISL_17075759	0.09330985915492962	0.1338028169014085	0.08450704225352113	0.08274647887323938	0.09507042253521125	0.08098591549295775	0.08098591549295775	0.0880281690140845	0.08098591549295775	0.09154929577464788	0.09859154929577463	0.09330985915492962	0.08274647887323938	0.09154929577464788	0.08978873239436624	0.10563380281690138	0.08978873239436624	0.017605633802816878	0.05633802816901412	0.040492957746478875	0.073943661971831	0.05633802816901412	0.051056338028169	0.01232394366197187	0.08626760563380287	0.0880281690140845	0.09154929577464788	0.079225352112676	0.08274647887323938	0.09154929577464788	0.08274647887323938	0.08274647887323938	0.08978873239436624	0.0880281690140845	0.073943661971831	0.08274647887323938	0.0880281690140845	0.09330985915492962	0.08978873239436624	0.08978873239436624	0.10035211267605637	0.08274647887323938	0.079225352112676	0.08978873239436624	0.09154929577464788	0.015845070422535246	0.09154929577464788	0.0880281690140845	0
EPI_ISL_16813290	0.0880281690140845	0.13028169014084512	0.079225352112676	0.07746478873239437	0.08978873239436624	0.07746478873239437	0.079225352112676	0.08274647887323938	0.07746478873239437	0.09154929577464788	0.09507042253521125	0.08978873239436624	0.079225352112676	0.08978873239436624	0.08978873239436624	0.10035211267605637	0.08626760563380287	0.01232394366197187	0.051056338028169	0.033450704225352124	0.07042253521126762	0.051056338028169	0.04401408450704225	0.007042253521126751	0.08098591549295775	0.08274647887323938	0.08978873239436624	0.073943661971831	0.07746478873239437	0.08626760563380287	0.07746478873239437	0.07746478873239437	0.0880281690140845	0.0880281690140845	0.06690140845070425	0.079225352112676	0.0880281690140845	0.08978873239436624	0.08626760563380287	0.08978873239436624	0.096830985915493	0.08274647887323938	0.07570422535211263	0.08978873239436624	0.09154929577464788	0.010563380281690127	0.0880281690140845	0.0880281690140845	0.01232394366197187
EPI_ISL_18161874	0.08626760563380287	0.125	0.07746478873239437	0.07570422535211263	0.0880281690140845	0.07570422535211263	0.07746478873239437	0.08098591549295775	0.073943661971831	0.0880281690140845	0.09154929577464788	0.08626760563380287	0.07746478873239437	0.0880281690140845	0.08626760563380287	0.09859154929577463	0.079225352112676	0.015845070422535246	0.04929577464788737	0.033450704225352124	0.07042253521126762	0.051056338028169	0.04401408450704225	0.010563380281690127	0.08098591549295775	0.08098591549295775	0.0880281690140845	0.07218309859154926	0.07570422535211263	0.08450704225352113	0.07570422535211263	0.07570422535211263	0.08274647887323938	0.08626760563380287	0.06338028169014087	0.07746478873239437	0.0880281690140845	0.08626760563380287	0.08274647887323938	0.0880281690140845	0.09330985915492962	0.08274647887323938	0.073943661971831	0.08626760563380287	0.0880281690140845	0.014084507042253502	0.08450704225352113	0.08450704225352113	0.015845070422535246
EPI_ISL_73313	0.059859154929577496	0.10915492957746475	0.04929577464788737	0.05809859154929575	0.06866197183098588	0.04225352112676062	0.04929577464788737	0.05633802816901412	0.045774647887323994	0.052816901408450745	0.06866197183098588	0.059859154929577496	0.05457746478873238	0.073943661971831	0.07570422535211263	0.07218309859154926	0.07042253521126762	0.06690140845070425	0.06690140845070425	0.059859154929577496	0.08098591549295775	0.07570422535211263	0.073943661971831	0.06161971830985913	0.059859154929577496	0.05633802816901412	0.06866197183098588	0.045774647887323994	0.047535211267605626	0.0651408450704225	0.04929577464788737	0.04929577464788737	0.05457746478873238	0.08450704225352113	0.029929577464788748	0.051056338028169	0.05633802816901412	0.051056338028169	0.047535211267605626	0.05809859154929575	0.07746478873239437	0.05633802816901412	0.05633802816901412	0.059859154929577496	0.06161971830985913	0.06690140845070425	0.059859154929577496	0.07218309859154926	0.07218309859154926
EPI_ISL_73312	0.05633802816901412	0.10035211267605637	0.04929577464788737	0.05809859154929575	0.06866197183098588	0.04225352112676062	0.04929577464788737	0.06161971830985913	0.045774647887323994	0.05633802816901412	0.06866197183098588	0.06338028169014087	0.05633802816901412	0.073943661971831	0.073943661971831	0.06338028169014087	0.07042253521126762	0.07746478873239437	0.07570422535211263	0.0651408450704225	0.08626760563380287	0.08098591549295775	0.07570422535211263	0.073943661971831	0.06338028169014087	0.06161971830985913	0.06866197183098588	0.045774647887323994	0.047535211267605626	0.0651408450704225	0.045774647887323994	0.04929577464788737	0.05457746478873238	0.08626760563380287	0.028169014084507005	0.051056338028169	0.05633802816901412	0.04929577464788737	0.047535211267605626	0.05809859154929575	0.073943661971831	0.05633802816901412	0.05809859154929575	0.059859154929577496	0.06161971830985913	0.07570422535211263	0.06338028169014087	0.073943661971831	0.08274647887323938
EPI_ISL_73305	0.05633802816901412	0.10915492957746475	0.04929577464788737	0.05809859154929575	0.0651408450704225	0.04225352112676062	0.04929577464788737	0.06161971830985913	0.045774647887323994	0.05633802816901412	0.06866197183098588	0.06161971830985913	0.05457746478873238	0.07218309859154926	0.07218309859154926	0.06338028169014087	0.06866197183098588	0.079225352112676	0.07570422535211263	0.0651408450704225	0.08626760563380287	0.08098591549295775	0.07570422535211263	0.073943661971831	0.06338028169014087	0.06161971830985913	0.06866197183098588	0.04225352112676062	0.047535211267605626	0.0651408450704225	0.045774647887323994	0.04929577464788737	0.05457746478873238	0.0880281690140845	0.03169014084507038	0.051056338028169	0.05633802816901412	0.052816901408450745	0.047535211267605626	0.052816901408450745	0.07218309859154926	0.05633802816901412	0.05633802816901412	0.059859154929577496	0.06161971830985913	0.079225352112676	0.06161971830985913	0.07218309859154926	0.08450704225352113
EPI_ISL_73303	0.0651408450704225	0.10915492957746475	0.05457746478873238	0.06338028169014087	0.073943661971831	0.047535211267605626	0.051056338028169	0.059859154929577496	0.051056338028169	0.059859154929577496	0.06866197183098588	0.06866197183098588	0.05457746478873238	0.07570422535211263	0.07218309859154926	0.073943661971831	0.06690140845070425	0.07746478873239437	0.07746478873239437	0.06690140845070425	0.08626760563380287	0.08274647887323938	0.08098591549295775	0.07218309859154926	0.06866197183098588	0.059859154929577496	0.07218309859154926	0.051056338028169	0.052816901408450745	0.07042253521126762	0.05457746478873238	0.052816901408450745	0.05633802816901412	0.08626760563380287	0.03169014084507038	0.05457746478873238	0.06161971830985913	0.05633802816901412	0.052816901408450745	0.052816901408450745	0.06690140845070425	0.0651408450704225	0.05633802816901412	0.0651408450704225	0.06690140845070425	0.07746478873239437	0.06866197183098588	0.07218309859154926	0.08274647887323938
TE24|2.3.4.4b	0.08978873239436624	0.13204225352112675	0.08274647887323938	0.079225352112676	0.09154929577464788	0.08098591549295775	0.08098591549295775	0.0880281690140845	0.08098591549295775	0.09507042253521125	0.09859154929577463	0.09330985915492962	0.08274647887323938	0.09507042253521125	0.09154929577464788	0.10035211267605637	0.08978873239436624	0.007042253521126751	0.05809859154929575	0.040492957746478875	0.07218309859154926	0.05809859154929575	0.04929577464788737	0.01232394366197187	0.08274647887323938	0.0880281690140845	0.09154929577464788	0.07746478873239437	0.08098591549295775	0.0880281690140845	0.079225352112676	0.08274647887323938	0.08978873239436624	0.09330985915492962	0.07042253521126762	0.08274647887323938	0.09154929577464788	0.09330985915492962	0.08978873239436624	0.09154929577464788	0.09859154929577463	0.08626760563380287	0.079225352112676	0.09330985915492962	0.09507042253521125	0.0017605633802817433	0.09154929577464788	0.08978873239436624	0.017605633802816878
EPI_ISL_15542438	0.08626760563380287	0.12852112676056338	0.07746478873239437	0.07570422535211263	0.0880281690140845	0.07570422535211263	0.07746478873239437	0.08098591549295775	0.07570422535211263	0.08978873239436624	0.09330985915492962	0.0880281690140845	0.07746478873239437	0.0880281690140845	0.0880281690140845	0.09859154929577463	0.08450704225352113	0.01232394366197187	0.051056338028169	0.033450704225352124	0.06866197183098588	0.047535211267605626	0.04401408450704225	0.007042253521126751	0.079225352112676	0.08098591549295775	0.0880281690140845	0.07218309859154926	0.07570422535211263	0.08450704225352113	0.07570422535211263	0.07570422535211263	0.08626760563380287	0.08626760563380287	0.0651408450704225	0.07746478873239437	0.08626760563380287	0.0880281690140845	0.08450704225352113	0.0880281690140845	0.09507042253521125	0.08098591549295775	0.073943661971831	0.0880281690140845	0.08978873239436624	0.010563380281690127	0.08626760563380287	0.08626760563380287	0.01232394366197187
EPI_ISL_174484	0.05809859154929575	0.10739436619718312	0.047535211267605626	0.05633802816901412	0.0651408450704225	0.040492957746478875	0.047535211267605626	0.06338028169014087	0.04401408450704225	0.051056338028169	0.06338028169014087	0.05809859154929575	0.05457746478873238	0.06866197183098588	0.079225352112676	0.07042253521126762	0.073943661971831	0.079225352112676	0.073943661971831	0.06690140845070425	0.08450704225352113	0.079225352112676	0.07746478873239437	0.073943661971831	0.06338028169014087	0.06338028169014087	0.0651408450704225	0.04401408450704225	0.045774647887323994	0.06338028169014087	0.047535211267605626	0.047535211267605626	0.052816901408450745	0.079225352112676	0.02464788732394363	0.04929577464788737	0.04929577464788737	0.045774647887323994	0.045774647887323994	0.05633802816901412	0.07746478873239437	0.05809859154929575	0.059859154929577496	0.05809859154929575	0.059859154929577496	0.079225352112676	0.05809859154929575	0.07570422535211263	0.08450704225352113
EPI_ISL_18823967	0.10035211267605637	0.13556338028169013	0.08626760563380287	0.09154929577464788	0.09507042253521125	0.08978873239436624	0.09330985915492962	0.10035211267605637	0.08978873239436624	0.096830985915493	0.10739436619718312	0.102112676056338	0.05633802816901412	0.06338028169014087	0.028169014084507005	0.1161971830985915	0.045774647887323994	0.10563380281690138	0.10563380281690138	0.096830985915493	0.10563380281690138	0.10563380281690138	0.09330985915492962	0.10035211267605637	0.09330985915492962	0.10035211267605637	0.10035211267605637	0.08274647887323938	0.08450704225352113	0.09330985915492962	0.096830985915493	0.10035211267605637	0.09154929577464788	0.079225352112676	0.08626760563380287	0.08978873239436624	0.08978873239436624	0.09507042253521125	0.09507042253521125	0.10563380281690138	0.045774647887323994	0.09154929577464788	0.059859154929577496	0.09330985915492962	0.09507042253521125	0.10739436619718312	0.10035211267605637	0.04225352112676062	0.10387323943661975
EPI_ISL_17024123	0.102112676056338	0.13204225352112675	0.08626760563380287	0.08978873239436624	0.09507042253521125	0.09507042253521125	0.09330985915492962	0.102112676056338	0.09154929577464788	0.10035211267605637	0.10739436619718312	0.10035211267605637	0.06161971830985913	0.0651408450704225	0.03169014084507038	0.11795774647887325	0.04929577464788737	0.10739436619718312	0.1161971830985915	0.10739436619718312	0.11443661971830987	0.11443661971830987	0.10563380281690138	0.10387323943661975	0.09330985915492962	0.102112676056338	0.102112676056338	0.08626760563380287	0.08450704225352113	0.096830985915493	0.09859154929577463	0.10035211267605637	0.096830985915493	0.07746478873239437	0.09330985915492962	0.09154929577464788	0.09507042253521125	0.09507042253521125	0.09330985915492962	0.10387323943661975	0.052816901408450745	0.10035211267605637	0.06161971830985913	0.09330985915492962	0.09507042253521125	0.10915492957746475	0.09859154929577463	0.045774647887323994	0.11443661971830987
EPI_ISL_19156871	0.09154929577464788	0.125	0.07570422535211263	0.07570422535211263	0.08626760563380287	0.08098591549295775	0.079225352112676	0.08626760563380287	0.079225352112676	0.08978873239436624	0.09154929577464788	0.08978873239436624	0.045774647887323994	0.05633802816901412	0.04401408450704225	0.10387323943661975	0.02464788732394363	0.09154929577464788	0.09507042253521125	0.08450704225352113	0.096830985915493	0.096830985915493	0.09154929577464788	0.0880281690140845	0.08274647887323938	0.08626760563380287	0.0880281690140845	0.07570422535211263	0.073943661971831	0.08450704225352113	0.08978873239436624	0.08626760563380287	0.08098591549295775	0.07042253521126762	0.073943661971831	0.079225352112676	0.08274647887323938	0.08626760563380287	0.08274647887323938	0.08450704225352113	0.051056338028169	0.08978873239436624	0.047535211267605626	0.09154929577464788	0.09330985915492962	0.09507042253521125	0.0880281690140845	0.040492957746478875	0.09859154929577463
EPI_ISL_154130	0.0880281690140845	0.12323943661971826	0.07042253521126762	0.07570422535211263	0.08274647887323938	0.073943661971831	0.07746478873239437	0.08450704225352113	0.07218309859154926	0.079225352112676	0.08978873239436624	0.08274647887323938	0.0369718309859155	0.04401408450704225	0.0035211267605633756	0.10035211267605637	0.029929577464788748	0.08978873239436624	0.09330985915492962	0.08450704225352113	0.09507042253521125	0.09330985915492962	0.08450704225352113	0.08450704225352113	0.079225352112676	0.08450704225352113	0.0880281690140845	0.06866197183098588	0.06866197183098588	0.08098591549295775	0.08098591549295775	0.08450704225352113	0.07570422535211263	0.059859154929577496	0.06866197183098588	0.073943661971831	0.07218309859154926	0.07746478873239437	0.07746478873239437	0.08978873239436624	0.026408450704225372	0.07746478873239437	0.040492957746478875	0.079225352112676	0.08098591549295775	0.09154929577464788	0.08098591549295775	0.021126760563380254	0.09154929577464788
EPI_ISL_31736	0.05633802816901412	0.10387323943661975	0.045774647887323994	0.051056338028169	0.05809859154929575	0.0369718309859155	0.051056338028169	0.06866197183098588	0.01936619718309862	0.015845070422535246	0.04225352112676062	0.02464788732394363	0.05633802816901412	0.07570422535211263	0.079225352112676	0.07042253521126762	0.07570422535211263	0.09330985915492962	0.0880281690140845	0.08274647887323938	0.096830985915493	0.096830985915493	0.09154929577464788	0.08978873239436624	0.059859154929577496	0.06866197183098588	0.06161971830985913	0.035211267605633756	0.04401408450704225	0.059859154929577496	0.047535211267605626	0.05457746478873238	0.04929577464788737	0.08626760563380287	0.06161971830985913	0.045774647887323994	0.022887323943661997	0.026408450704225372	0.02464788732394363	0.05809859154929575	0.08978873239436624	0.0369718309859155	0.06338028169014087	0.028169014084507005	0.03169014084507038	0.09154929577464788	0.021126760563380254	0.07746478873239437	0.09507042253521125
EPI_ISL_166659	0.05809859154929575	0.10563380281690138	0.028169014084507005	0.021126760563380254	0.014084507042253502	0.045774647887323994	0.047535211267605626	0.06338028169014087	0.04929577464788737	0.059859154929577496	0.0651408450704225	0.0651408450704225	0.06161971830985913	0.06690140845070425	0.08098591549295775	0.0651408450704225	0.079225352112676	0.08626760563380287	0.09154929577464788	0.079225352112676	0.10739436619718312	0.09154929577464788	0.08978873239436624	0.08274647887323938	0.01232394366197187	0.06338028169014087	0.02464788732394363	0.0369718309859155	0.026408450704225372	0.014084507042253502	0.047535211267605626	0.051056338028169	0.052816901408450745	0.07746478873239437	0.05809859154929575	0.033450704225352124	0.059859154929577496	0.05633802816901412	0.047535211267605626	0.05457746478873238	0.08274647887323938	0.059859154929577496	0.06161971830985913	0.05633802816901412	0.05809859154929575	0.08450704225352113	0.06338028169014087	0.079225352112676	0.08978873239436624
EPI_ISL_68082	0.02464788732394363	0.09154929577464788	0.028169014084507005	0.03873239436619713	0.051056338028169	0.022887323943661997	0.033450704225352124	0.04929577464788737	0.029929577464788748	0.04225352112676062	0.06338028169014087	0.045774647887323994	0.052816901408450745	0.07570422535211263	0.08098591549295775	0.04225352112676062	0.07570422535211263	0.08274647887323938	0.08274647887323938	0.06866197183098588	0.09330985915492962	0.0880281690140845	0.08098591549295775	0.07746478873239437	0.04929577464788737	0.04929577464788737	0.047535211267605626	0.02464788732394363	0.026408450704225372	0.04401408450704225	0.021126760563380254	0.0369718309859155	0.040492957746478875	0.08450704225352113	0.051056338028169	0.028169014084507005	0.04225352112676062	0.03873239436619713	0.0369718309859155	0.045774647887323994	0.08626760563380287	0.04225352112676062	0.059859154929577496	0.040492957746478875	0.04401408450704225	0.08098591549295775	0.045774647887323994	0.07746478873239437	0.08450704225352113
EPI_ISL_4138	0.017605633802816878	0.09507042253521125	0.04401408450704225	0.05633802816901412	0.06866197183098588	0.04401408450704225	0.051056338028169	0.06690140845070425	0.04929577464788737	0.06161971830985913	0.07746478873239437	0.06690140845070425	0.06690140845070425	0.0880281690140845	0.09154929577464788	0.047535211267605626	0.08978873239436624	0.10035211267605637	0.10035211267605637	0.09154929577464788	0.10739436619718312	0.10563380281690138	0.09859154929577463	0.096830985915493	0.06690140845070425	0.06690140845070425	0.0651408450704225	0.045774647887323994	0.04225352112676062	0.06161971830985913	0.03169014084507038	0.05457746478873238	0.05633802816901412	0.096830985915493	0.07042253521126762	0.045774647887323994	0.05809859154929575	0.05809859154929575	0.052816901408450745	0.06161971830985913	0.096830985915493	0.06161971830985913	0.07218309859154926	0.06161971830985913	0.0651408450704225	0.09859154929577463	0.06690140845070425	0.09154929577464788	0.10387323943661975
EPI_ISL_65327	0.028169014084507005	0.08274647887323938	0.021126760563380254	0.03169014084507038	0.047535211267605626	0.015845070422535246	0.026408450704225372	0.04401408450704225	0.026408450704225372	0.03873239436619713	0.05457746478873238	0.04401408450704225	0.047535211267605626	0.07042253521126762	0.07570422535211263	0.04225352112676062	0.06690140845070425	0.08098591549295775	0.079225352112676	0.07042253521126762	0.08978873239436624	0.08450704225352113	0.07746478873239437	0.07570422535211263	0.045774647887323994	0.04401408450704225	0.04225352112676062	0.017605633802816878	0.01936619718309862	0.03873239436619713	0.021126760563380254	0.029929577464788748	0.029929577464788748	0.079225352112676	0.047535211267605626	0.022887323943661997	0.03873239436619713	0.035211267605633756	0.029929577464788748	0.03873239436619713	0.08098591549295775	0.04225352112676062	0.05457746478873238	0.03873239436619713	0.040492957746478875	0.079225352112676	0.04401408450704225	0.07218309859154926	0.08274647887323938
EPI_ISL_10333	0.04401408450704225	0.096830985915493	0.03169014084507038	0.03873239436619713	0.052816901408450745	0.028169014084507005	0.040492957746478875	0.05809859154929575	0.008802816901408494	0.015845070422535246	0.040492957746478875	0.026408450704225372	0.045774647887323994	0.0651408450704225	0.06690140845070425	0.05809859154929575	0.06690140845070425	0.0880281690140845	0.08274647887323938	0.07570422535211263	0.09507042253521125	0.0880281690140845	0.08274647887323938	0.08274647887323938	0.04929577464788737	0.05809859154929575	0.052816901408450745	0.02464788732394363	0.029929577464788748	0.04929577464788737	0.035211267605633756	0.04401408450704225	0.04225352112676062	0.073943661971831	0.05457746478873238	0.03169014084507038	0.015845070422535246	0.015845070422535246	0.014084507042253502	0.047535211267605626	0.08098591549295775	0.026408450704225372	0.052816901408450745	0.015845070422535246	0.01936619718309862	0.08626760563380287	0.026408450704225372	0.0651408450704225	0.08450704225352113
EPI_ISL_76976	0.04225352112676062	0.096830985915493	0.029929577464788748	0.04225352112676062	0.05457746478873238	0.022887323943661997	0.022887323943661997	0.040492957746478875	0.033450704225352124	0.045774647887323994	0.05809859154929575	0.051056338028169	0.05633802816901412	0.07746478873239437	0.07570422535211263	0.04929577464788737	0.07042253521126762	0.08626760563380287	0.08450704225352113	0.07218309859154926	0.09507042253521125	0.0880281690140845	0.0880281690140845	0.08098591549295775	0.052816901408450745	0.040492957746478875	0.051056338028169	0.033450704225352124	0.028169014084507005	0.047535211267605626	0.035211267605633756	0.028169014084507005	0.028169014084507005	0.0880281690140845	0.04401408450704225	0.029929577464788748	0.045774647887323994	0.04225352112676062	0.0369718309859155	0.029929577464788748	0.073943661971831	0.040492957746478875	0.06338028169014087	0.045774647887323994	0.047535211267605626	0.08450704225352113	0.051056338028169	0.07218309859154926	0.08450704225352113
EPI_ISL_76973	0.047535211267605626	0.09154929577464788	0.03873239436619713	0.045774647887323994	0.05633802816901412	0.022887323943661997	0.014084507042253502	0.033450704225352124	0.0369718309859155	0.047535211267605626	0.05633802816901412	0.051056338028169	0.052816901408450745	0.07570422535211263	0.07570422535211263	0.059859154929577496	0.07042253521126762	0.08450704225352113	0.08626760563380287	0.07746478873239437	0.09507042253521125	0.0880281690140845	0.0880281690140845	0.079225352112676	0.05633802816901412	0.033450704225352124	0.05809859154929575	0.03169014084507038	0.0369718309859155	0.05457746478873238	0.040492957746478875	0.021126760563380254	0.026408450704225372	0.08450704225352113	0.051056338028169	0.040492957746478875	0.047535211267605626	0.045774647887323994	0.03873239436619713	0.01232394366197187	0.08098591549295775	0.051056338028169	0.059859154929577496	0.04929577464788737	0.051056338028169	0.08274647887323938	0.051056338028169	0.07218309859154926	0.08450704225352113
EPI_ISL_76967	0.040492957746478875	0.08978873239436624	0.035211267605633756	0.045774647887323994	0.05809859154929575	0.014084507042253502	0.017605633802816878	0.035211267605633756	0.029929577464788748	0.04225352112676062	0.05457746478873238	0.047535211267605626	0.047535211267605626	0.06690140845070425	0.06866197183098588	0.05457746478873238	0.06690140845070425	0.08274647887323938	0.08274647887323938	0.073943661971831	0.09154929577464788	0.08274647887323938	0.08450704225352113	0.07746478873239437	0.05633802816901412	0.035211267605633756	0.05457746478873238	0.028169014084507005	0.033450704225352124	0.047535211267605626	0.033450704225352124	0.022887323943661997	0.026408450704225372	0.07746478873239437	0.047535211267605626	0.0369718309859155	0.04225352112676062	0.04225352112676062	0.0369718309859155	0.029929577464788748	0.07746478873239437	0.045774647887323994	0.05457746478873238	0.045774647887323994	0.047535211267605626	0.08098591549295775	0.047535211267605626	0.06866197183098588	0.08274647887323938
EPI_ISL_243347	0.0880281690140845	0.125	0.07218309859154926	0.073943661971831	0.08098591549295775	0.07218309859154926	0.08098591549295775	0.09330985915492962	0.07218309859154926	0.08450704225352113	0.0880281690140845	0.08274647887323938	0.04225352112676062	0.017605633802816878	0.05809859154929575	0.096830985915493	0.05633802816901412	0.09330985915492962	0.08978873239436624	0.08626760563380287	0.09859154929577463	0.09154929577464788	0.0880281690140845	0.0880281690140845	0.08098591549295775	0.09330985915492962	0.08450704225352113	0.06866197183098588	0.07042253521126762	0.07746478873239437	0.08098591549295775	0.08450704225352113	0.08626760563380287	0.01936619718309862	0.07570422535211263	0.07570422535211263	0.08274647887323938	0.079225352112676	0.08098591549295775	0.09154929577464788	0.059859154929577496	0.08626760563380287	0.033450704225352124	0.0880281690140845	0.08978873239436624	0.09507042253521125	0.08098591549295775	0.06161971830985913	0.096830985915493
EPI_ISL_221726	0.09154929577464788	0.12852112676056338	0.079225352112676	0.08098591549295775	0.08626760563380287	0.07746478873239437	0.08098591549295775	0.09330985915492962	0.07570422535211263	0.08450704225352113	0.08978873239436624	0.08450704225352113	0.047535211267605626	0.021126760563380254	0.06161971830985913	0.10035211267605637	0.0651408450704225	0.0880281690140845	0.08626760563380287	0.08450704225352113	0.096830985915493	0.0880281690140845	0.0880281690140845	0.08274647887323938	0.0880281690140845	0.09330985915492962	0.09154929577464788	0.073943661971831	0.07746478873239437	0.08450704225352113	0.08450704225352113	0.08626760563380287	0.09154929577464788	0.008802816901408494	0.08098591549295775	0.08098591549295775	0.08098591549295775	0.08098591549295775	0.08450704225352113	0.08978873239436624	0.06690140845070425	0.08978873239436624	0.03873239436619713	0.08626760563380287	0.0880281690140845	0.08978873239436624	0.08274647887323938	0.0651408450704225	0.08626760563380287
EPI_ISL_190517	0.04401408450704225	0.09330985915492962	0.03169014084507038	0.04225352112676062	0.05633802816901412	0.021126760563380254	0.021126760563380254	0.040492957746478875	0.033450704225352124	0.045774647887323994	0.05809859154929575	0.051056338028169	0.05457746478873238	0.07746478873239437	0.07570422535211263	0.051056338028169	0.07042253521126762	0.08626760563380287	0.08626760563380287	0.07570422535211263	0.09507042253521125	0.0880281690140845	0.0880281690140845	0.08098591549295775	0.05457746478873238	0.040492957746478875	0.052816901408450745	0.03169014084507038	0.029929577464788748	0.04929577464788737	0.0369718309859155	0.026408450704225372	0.026408450704225372	0.0880281690140845	0.045774647887323994	0.033450704225352124	0.045774647887323994	0.04225352112676062	0.0369718309859155	0.029929577464788748	0.07746478873239437	0.045774647887323994	0.06161971830985913	0.045774647887323994	0.047535211267605626	0.08450704225352113	0.051056338028169	0.07218309859154926	0.08626760563380287
EPI_ISL_15878542	0.08626760563380287	0.12852112676056338	0.07746478873239437	0.07570422535211263	0.0880281690140845	0.07570422535211263	0.07746478873239437	0.08098591549295775	0.07570422535211263	0.08978873239436624	0.09330985915492962	0.0880281690140845	0.07746478873239437	0.0880281690140845	0.0880281690140845	0.09859154929577463	0.08450704225352113	0.010563380281690127	0.04929577464788737	0.03169014084507038	0.06866197183098588	0.04929577464788737	0.04225352112676062	0.005281690140845119	0.079225352112676	0.08098591549295775	0.0880281690140845	0.07218309859154926	0.07570422535211263	0.08450704225352113	0.07570422535211263	0.07570422535211263	0.08626760563380287	0.08626760563380287	0.0651408450704225	0.07746478873239437	0.08626760563380287	0.0880281690140845	0.08450704225352113	0.0880281690140845	0.09507042253521125	0.08098591549295775	0.073943661971831	0.0880281690140845	0.08978873239436624	0.008802816901408494	0.08626760563380287	0.08626760563380287	0.010563380281690127
EPI_ISL_18226744	0.0880281690140845	0.12676056338028174	0.079225352112676	0.07746478873239437	0.08978873239436624	0.07746478873239437	0.079225352112676	0.08274647887323938	0.07746478873239437	0.09154929577464788	0.09507042253521125	0.08978873239436624	0.079225352112676	0.08978873239436624	0.08978873239436624	0.10035211267605637	0.08274647887323938	0.014084507042253502	0.052816901408450745	0.035211267605633756	0.07042253521126762	0.052816901408450745	0.045774647887323994	0.008802816901408494	0.08098591549295775	0.08274647887323938	0.08978873239436624	0.073943661971831	0.07746478873239437	0.08626760563380287	0.07746478873239437	0.07746478873239437	0.08450704225352113	0.0880281690140845	0.06690140845070425	0.079225352112676	0.0880281690140845	0.08978873239436624	0.08626760563380287	0.08978873239436624	0.096830985915493	0.08274647887323938	0.07570422535211263	0.08978873239436624	0.09154929577464788	0.01232394366197187	0.0880281690140845	0.0880281690140845	0.014084507042253502
EPI_ISL_393329	0.08978873239436624	0.12323943661971826	0.07218309859154926	0.07570422535211263	0.08450704225352113	0.07218309859154926	0.07570422535211263	0.08626760563380287	0.07042253521126762	0.07746478873239437	0.0880281690140845	0.08098591549295775	0.035211267605633756	0.04225352112676062	0.005281690140845119	0.09859154929577463	0.028169014084507005	0.08978873239436624	0.09330985915492962	0.08450704225352113	0.09507042253521125	0.09330985915492962	0.08450704225352113	0.08450704225352113	0.08098591549295775	0.08626760563380287	0.08978873239436624	0.06690140845070425	0.07042253521126762	0.08274647887323938	0.08274647887323938	0.08274647887323938	0.073943661971831	0.05809859154929575	0.07042253521126762	0.07570422535211263	0.07042253521126762	0.07570422535211263	0.07570422535211263	0.08450704225352113	0.02464788732394363	0.079225352112676	0.03873239436619713	0.07746478873239437	0.079225352112676	0.09154929577464788	0.079225352112676	0.022887323943661997	0.09154929577464788
EPI_ISL_221722	0.0880281690140845	0.1161971830985915	0.06690140845070425	0.07218309859154926	0.079225352112676	0.073943661971831	0.073943661971831	0.08450704225352113	0.07570422535211263	0.08978873239436624	0.096830985915493	0.08626760563380287	0.047535211267605626	0.05633802816901412	0.029929577464788748	0.096830985915493	0.04225352112676062	0.08978873239436624	0.09507042253521125	0.0880281690140845	0.096830985915493	0.09507042253521125	0.0880281690140845	0.08450704225352113	0.07570422535211263	0.08450704225352113	0.08098591549295775	0.07042253521126762	0.0651408450704225	0.07570422535211263	0.079225352112676	0.08098591549295775	0.07570422535211263	0.0651408450704225	0.07746478873239437	0.07218309859154926	0.08274647887323938	0.08274647887323938	0.07746478873239437	0.08978873239436624	0.03873239436619713	0.08098591549295775	0.05457746478873238	0.09154929577464788	0.09330985915492962	0.09154929577464788	0.08450704225352113	0.03873239436619713	0.09507042253521125
EPI_ISL_18102701	0.09507042253521125	0.13204225352112675	0.08626760563380287	0.08450704225352113	0.096830985915493	0.08274647887323938	0.08274647887323938	0.08978873239436624	0.08274647887323938	0.09330985915492962	0.10035211267605637	0.09507042253521125	0.08450704225352113	0.08978873239436624	0.08450704225352113	0.10387323943661975	0.0880281690140845	0.017605633802816878	0.05457746478873238	0.040492957746478875	0.073943661971831	0.05457746478873238	0.045774647887323994	0.01232394366197187	0.0880281690140845	0.08978873239436624	0.096830985915493	0.08098591549295775	0.08450704225352113	0.09330985915492962	0.08450704225352113	0.08450704225352113	0.0880281690140845	0.08978873239436624	0.07218309859154926	0.08450704225352113	0.08978873239436624	0.09507042253521125	0.09154929577464788	0.09154929577464788	0.09507042253521125	0.08450704225352113	0.08098591549295775	0.09154929577464788	0.09330985915492962	0.015845070422535246	0.09330985915492962	0.08274647887323938	0.007042253521126751
EPI_ISL_144532	0.051056338028169	0.10035211267605637	0.04401408450704225	0.052816901408450745	0.06338028169014087	0.0369718309859155	0.04401408450704225	0.059859154929577496	0.040492957746478875	0.051056338028169	0.06338028169014087	0.05809859154929575	0.051056338028169	0.07218309859154926	0.07570422535211263	0.06161971830985913	0.07042253521126762	0.07570422535211263	0.07042253521126762	0.059859154929577496	0.08098591549295775	0.07570422535211263	0.073943661971831	0.07218309859154926	0.059859154929577496	0.059859154929577496	0.06338028169014087	0.040492957746478875	0.04225352112676062	0.059859154929577496	0.040492957746478875	0.04401408450704225	0.04929577464788737	0.08098591549295775	0.026408450704225372	0.045774647887323994	0.051056338028169	0.04401408450704225	0.04225352112676062	0.052816901408450745	0.07570422535211263	0.05457746478873238	0.05633802816901412	0.05457746478873238	0.05633802816901412	0.07570422535211263	0.05809859154929575	0.07218309859154926	0.08274647887323938
EPI_ISL_244744	0.09330985915492962	0.11971830985915488	0.07218309859154926	0.07746478873239437	0.08274647887323938	0.08098591549295775	0.08098591549295775	0.08978873239436624	0.08274647887323938	0.096830985915493	0.10035211267605637	0.09330985915492962	0.052816901408450745	0.059859154929577496	0.033450704225352124	0.09859154929577463	0.045774647887323994	0.09330985915492962	0.09859154929577463	0.09154929577464788	0.102112676056338	0.09859154929577463	0.08978873239436624	0.0880281690140845	0.07570422535211263	0.08978873239436624	0.08450704225352113	0.07746478873239437	0.07042253521126762	0.079225352112676	0.08274647887323938	0.0880281690140845	0.08274647887323938	0.06866197183098588	0.079225352112676	0.07746478873239437	0.08978873239436624	0.08978873239436624	0.08450704225352113	0.096830985915493	0.040492957746478875	0.08626760563380287	0.05633802816901412	0.09859154929577463	0.10035211267605637	0.09507042253521125	0.09154929577464788	0.04225352112676062	0.09859154929577463
EPI_ISL_19151390	0.08626760563380287	0.12852112676056338	0.079225352112676	0.07570422535211263	0.0880281690140845	0.07746478873239437	0.07746478873239437	0.08450704225352113	0.07746478873239437	0.09154929577464788	0.09507042253521125	0.08978873239436624	0.079225352112676	0.09154929577464788	0.0880281690140845	0.096830985915493	0.08626760563380287	0.010563380281690127	0.05633802816901412	0.040492957746478875	0.07218309859154926	0.05809859154929575	0.04929577464788737	0.015845070422535246	0.08274647887323938	0.08450704225352113	0.0880281690140845	0.073943661971831	0.07746478873239437	0.08450704225352113	0.07570422535211263	0.079225352112676	0.08626760563380287	0.08978873239436624	0.06690140845070425	0.079225352112676	0.09154929577464788	0.08978873239436624	0.08626760563380287	0.0880281690140845	0.09507042253521125	0.08626760563380287	0.07570422535211263	0.08978873239436624	0.09154929577464788	0.005281690140845119	0.0880281690140845	0.08626760563380287	0.021126760563380254
EPI_ISL_15878540	0.0880281690140845	0.13028169014084512	0.079225352112676	0.07746478873239437	0.08978873239436624	0.07746478873239437	0.079225352112676	0.08274647887323938	0.07746478873239437	0.09154929577464788	0.09507042253521125	0.08978873239436624	0.079225352112676	0.08978873239436624	0.08978873239436624	0.10035211267605637	0.08450704225352113	0.01232394366197187	0.051056338028169	0.033450704225352124	0.07042253521126762	0.051056338028169	0.04401408450704225	0.007042253521126751	0.08098591549295775	0.08274647887323938	0.08978873239436624	0.073943661971831	0.07746478873239437	0.08626760563380287	0.07746478873239437	0.07746478873239437	0.0880281690140845	0.0880281690140845	0.06690140845070425	0.079225352112676	0.0880281690140845	0.08978873239436624	0.08626760563380287	0.08978873239436624	0.096830985915493	0.08274647887323938	0.07570422535211263	0.08978873239436624	0.09154929577464788	0.010563380281690127	0.0880281690140845	0.0880281690140845	0.01232394366197187
EPI_ISL_16632542	0.09507042253521125	0.13028169014084512	0.0880281690140845	0.08274647887323938	0.09507042253521125	0.08626760563380287	0.08626760563380287	0.09330985915492962	0.08626760563380287	0.10035211267605637	0.10387323943661975	0.09859154929577463	0.0880281690140845	0.09507042253521125	0.08978873239436624	0.10739436619718312	0.09154929577464788	0.01232394366197187	0.05809859154929575	0.04225352112676062	0.07746478873239437	0.05633802816901412	0.051056338028169	0.015845070422535246	0.08626760563380287	0.09330985915492962	0.09507042253521125	0.08274647887323938	0.08626760563380287	0.09154929577464788	0.08450704225352113	0.0880281690140845	0.09154929577464788	0.09330985915492962	0.073943661971831	0.0880281690140845	0.096830985915493	0.09859154929577463	0.09507042253521125	0.096830985915493	0.096830985915493	0.09154929577464788	0.08450704225352113	0.09859154929577463	0.10035211267605637	0.010563380281690127	0.096830985915493	0.09154929577464788	0.021126760563380254
EPI_ISL_19094623	0.09154929577464788	0.1338028169014085	0.08450704225352113	0.08098591549295775	0.09330985915492962	0.08274647887323938	0.08274647887323938	0.08978873239436624	0.08274647887323938	0.096830985915493	0.10035211267605637	0.09507042253521125	0.08450704225352113	0.096830985915493	0.09330985915492962	0.102112676056338	0.09154929577464788	0.008802816901408494	0.059859154929577496	0.04225352112676062	0.073943661971831	0.059859154929577496	0.051056338028169	0.014084507042253502	0.08450704225352113	0.08978873239436624	0.09330985915492962	0.079225352112676	0.08274647887323938	0.08978873239436624	0.08098591549295775	0.08450704225352113	0.09154929577464788	0.09507042253521125	0.07218309859154926	0.08450704225352113	0.09330985915492962	0.09507042253521125	0.09154929577464788	0.09330985915492962	0.10035211267605637	0.0880281690140845	0.08098591549295775	0.09507042253521125	0.096830985915493	0.0035211267605633756	0.09330985915492962	0.09154929577464788	0.01936619718309862
EPI_ISL_16837243	0.051056338028169	0.10387323943661975	0.040492957746478875	0.04929577464788737	0.059859154929577496	0.033450704225352124	0.040492957746478875	0.052816901408450745	0.0369718309859155	0.047535211267605626	0.05809859154929575	0.05457746478873238	0.047535211267605626	0.06866197183098588	0.06866197183098588	0.0651408450704225	0.06338028169014087	0.07042253521126762	0.06690140845070425	0.05633802816901412	0.079225352112676	0.07218309859154926	0.07042253521126762	0.0651408450704225	0.05457746478873238	0.052816901408450745	0.059859154929577496	0.0369718309859155	0.03873239436619713	0.05633802816901412	0.040492957746478875	0.040492957746478875	0.045774647887323994	0.08098591549295775	0.022887323943661997	0.04225352112676062	0.047535211267605626	0.04401408450704225	0.03873239436619713	0.04929577464788737	0.07218309859154926	0.051056338028169	0.04929577464788737	0.051056338028169	0.052816901408450745	0.07042253521126762	0.05457746478873238	0.06866197183098588	0.07570422535211263
EPI_ISL_132309	0.045774647887323994	0.102112676056338	0.01232394366197187	0.007042253521126751	0.021126760563380254	0.03169014084507038	0.03873239436619713	0.05457746478873238	0.03873239436619713	0.051056338028169	0.059859154929577496	0.05457746478873238	0.052816901408450745	0.0651408450704225	0.073943661971831	0.052816901408450745	0.06866197183098588	0.079225352112676	0.08450704225352113	0.07218309859154926	0.09859154929577463	0.08450704225352113	0.079225352112676	0.07570422535211263	0.01936619718309862	0.05457746478873238	0.014084507042253502	0.026408450704225372	0.010563380281690127	0.014084507042253502	0.033450704225352124	0.04225352112676062	0.04225352112676062	0.073943661971831	0.051056338028169	0.017605633802816878	0.051056338028169	0.045774647887323994	0.03873239436619713	0.047535211267605626	0.07570422535211263	0.047535211267605626	0.052816901408450745	0.047535211267605626	0.04929577464788737	0.07746478873239437	0.052816901408450745	0.06866197183098588	0.08274647887323938
EPI_ISL_2917	0.04401408450704225	0.08978873239436624	0.03873239436619713	0.04929577464788737	0.06161971830985913	0.017605633802816878	0.021126760563380254	0.03873239436619713	0.033450704225352124	0.045774647887323994	0.05809859154929575	0.051056338028169	0.051056338028169	0.07042253521126762	0.07218309859154926	0.05809859154929575	0.07042253521126762	0.08626760563380287	0.08626760563380287	0.07746478873239437	0.09507042253521125	0.08626760563380287	0.0880281690140845	0.08098591549295775	0.059859154929577496	0.03873239436619713	0.05809859154929575	0.03169014084507038	0.0369718309859155	0.051056338028169	0.0369718309859155	0.026408450704225372	0.029929577464788748	0.08098591549295775	0.051056338028169	0.040492957746478875	0.045774647887323994	0.045774647887323994	0.040492957746478875	0.033450704225352124	0.08098591549295775	0.04929577464788737	0.05809859154929575	0.04929577464788737	0.051056338028169	0.08450704225352113	0.051056338028169	0.07218309859154926	0.08626760563380287
EPI_ISL_17699034	0.0880281690140845	0.12852112676056338	0.079225352112676	0.07746478873239437	0.08978873239436624	0.07746478873239437	0.079225352112676	0.08274647887323938	0.07746478873239437	0.09154929577464788	0.09507042253521125	0.08978873239436624	0.07746478873239437	0.08626760563380287	0.0880281690140845	0.10035211267605637	0.08098591549295775	0.01232394366197187	0.051056338028169	0.033450704225352124	0.06866197183098588	0.051056338028169	0.04401408450704225	0.007042253521126751	0.08098591549295775	0.08274647887323938	0.08978873239436624	0.073943661971831	0.07746478873239437	0.08626760563380287	0.07746478873239437	0.07746478873239437	0.08450704225352113	0.08450704225352113	0.06338028169014087	0.079225352112676	0.0880281690140845	0.08626760563380287	0.08626760563380287	0.08978873239436624	0.096830985915493	0.08274647887323938	0.07218309859154926	0.08978873239436624	0.09154929577464788	0.015845070422535246	0.0880281690140845	0.08626760563380287	0.017605633802816878
EPI_ISL_103200	0.08450704225352113	0.10739436619718312	0.06690140845070425	0.06690140845070425	0.079225352112676	0.06338028169014087	0.06690140845070425	0.08274647887323938	0.051056338028169	0.05633802816901412	0.022887323943661997	0.06161971830985913	0.07570422535211263	0.0880281690140845	0.10035211267605637	0.09154929577464788	0.09507042253521125	0.10035211267605637	0.096830985915493	0.09154929577464788	0.11443661971830987	0.10563380281690138	0.10387323943661975	0.09507042253521125	0.07570422535211263	0.08274647887323938	0.079225352112676	0.06338028169014087	0.0651408450704225	0.07746478873239437	0.07042253521126762	0.07042253521126762	0.07218309859154926	0.09330985915492962	0.07570422535211263	0.06690140845070425	0.05457746478873238	0.059859154929577496	0.052816901408450745	0.07218309859154926	0.10739436619718312	0.06338028169014087	0.079225352112676	0.059859154929577496	0.059859154929577496	0.10035211267605637	0.059859154929577496	0.096830985915493	0.10035211267605637
EPI_ISL_105043	0.07042253521126762	0.11443661971830987	0.06161971830985913	0.0651408450704225	0.07570422535211263	0.051056338028169	0.05809859154929575	0.07218309859154926	0.05633802816901412	0.06338028169014087	0.073943661971831	0.06690140845070425	0.022887323943661997	0.04225352112676062	0.0369718309859155	0.08274647887323938	0.03873239436619713	0.079225352112676	0.08626760563380287	0.07218309859154926	0.0880281690140845	0.0880281690140845	0.08098591549295775	0.073943661971831	0.07218309859154926	0.07218309859154926	0.07746478873239437	0.052816901408450745	0.059859154929577496	0.073943661971831	0.06338028169014087	0.0651408450704225	0.06338028169014087	0.05457746478873238	0.059859154929577496	0.0651408450704225	0.059859154929577496	0.0651408450704225	0.06161971830985913	0.07042253521126762	0.052816901408450745	0.06866197183098588	0.03169014084507038	0.06690140845070425	0.06866197183098588	0.08098591549295775	0.0651408450704225	0.033450704225352124	0.08098591549295775
EPI_ISL_206440	0.0880281690140845	0.13028169014084512	0.079225352112676	0.079225352112676	0.09330985915492962	0.07746478873239437	0.0880281690140845	0.09330985915492962	0.07570422535211263	0.08978873239436624	0.096830985915493	0.09154929577464788	0.08098591549295775	0.08450704225352113	0.08626760563380287	0.09330985915492962	0.08098591549295775	0.047535211267605626	0.03873239436619713	0.0369718309859155	0.0651408450704225	0.040492957746478875	0.0035211267605633756	0.04225352112676062	0.0880281690140845	0.09330985915492962	0.09154929577464788	0.07570422535211263	0.07746478873239437	0.08274647887323938	0.07746478873239437	0.0880281690140845	0.08626760563380287	0.09154929577464788	0.07042253521126762	0.08274647887323938	0.08626760563380287	0.0880281690140845	0.08450704225352113	0.09859154929577463	0.09330985915492962	0.08450704225352113	0.07746478873239437	0.08978873239436624	0.09154929577464788	0.045774647887323994	0.08978873239436624	0.08450704225352113	0.047535211267605626
EPI_ISL_15839844	0.09507042253521125	0.13556338028169013	0.08626760563380287	0.08450704225352113	0.096830985915493	0.08274647887323938	0.08450704225352113	0.0880281690140845	0.08450704225352113	0.09859154929577463	0.10035211267605637	0.096830985915493	0.08626760563380287	0.096830985915493	0.096830985915493	0.10387323943661975	0.09330985915492962	0.021126760563380254	0.05809859154929575	0.040492957746478875	0.07570422535211263	0.05633802816901412	0.051056338028169	0.015845070422535246	0.0880281690140845	0.0880281690140845	0.09330985915492962	0.08098591549295775	0.08450704225352113	0.09330985915492962	0.08450704225352113	0.08274647887323938	0.09330985915492962	0.09507042253521125	0.073943661971831	0.08626760563380287	0.09507042253521125	0.096830985915493	0.09330985915492962	0.09154929577464788	0.10035211267605637	0.08626760563380287	0.08274647887323938	0.096830985915493	0.09859154929577463	0.01936619718309862	0.09507042253521125	0.09507042253521125	0.014084507042253502
EPI_ISL_78001	0.047535211267605626	0.10563380281690138	0.040492957746478875	0.04401408450704225	0.052816901408450745	0.0369718309859155	0.04225352112676062	0.05809859154929575	0.040492957746478875	0.047535211267605626	0.05633802816901412	0.052816901408450745	0.05457746478873238	0.073943661971831	0.079225352112676	0.06161971830985913	0.073943661971831	0.07570422535211263	0.07570422535211263	0.06690140845070425	0.0880281690140845	0.07570422535211263	0.07746478873239437	0.073943661971831	0.052816901408450745	0.05809859154929575	0.05633802816901412	0.033450704225352124	0.03873239436619713	0.052816901408450745	0.0369718309859155	0.045774647887323994	0.04929577464788737	0.08274647887323938	0.040492957746478875	0.04225352112676062	0.047535211267605626	0.04401408450704225	0.04225352112676062	0.051056338028169	0.08098591549295775	0.05457746478873238	0.05809859154929575	0.051056338028169	0.052816901408450745	0.073943661971831	0.052816901408450745	0.073943661971831	0.08274647887323938
EPI_ISL_123956	0.06161971830985913	0.09507042253521125	0.04929577464788737	0.05633802816901412	0.06690140845070425	0.045774647887323994	0.047535211267605626	0.05457746478873238	0.04929577464788737	0.059859154929577496	0.0651408450704225	0.06338028169014087	0.051056338028169	0.07042253521126762	0.06690140845070425	0.06338028169014087	0.06338028169014087	0.06690140845070425	0.07218309859154926	0.05633802816901412	0.08450704225352113	0.073943661971831	0.06866197183098588	0.06161971830985913	0.06161971830985913	0.05457746478873238	0.06690140845070425	0.045774647887323994	0.047535211267605626	0.06338028169014087	0.052816901408450745	0.047535211267605626	0.04929577464788737	0.08274647887323938	0.01232394366197187	0.04929577464788737	0.05809859154929575	0.05633802816901412	0.051056338028169	0.05633802816901412	0.0651408450704225	0.059859154929577496	0.05457746478873238	0.06161971830985913	0.06338028169014087	0.0651408450704225	0.06161971830985913	0.06690140845070425	0.07042253521126762
EPI_ISL_391469	0.08978873239436624	0.12852112676056338	0.07218309859154926	0.07570422535211263	0.08450704225352113	0.06866197183098588	0.07218309859154926	0.08098591549295775	0.07218309859154926	0.08098591549295775	0.08978873239436624	0.08274647887323938	0.03873239436619713	0.045774647887323994	0.014084507042253502	0.102112676056338	0.03169014084507038	0.09154929577464788	0.09507042253521125	0.08626760563380287	0.096830985915493	0.09154929577464788	0.08626760563380287	0.08626760563380287	0.08098591549295775	0.08098591549295775	0.08978873239436624	0.06690140845070425	0.07042253521126762	0.08274647887323938	0.08274647887323938	0.079225352112676	0.07042253521126762	0.06161971830985913	0.07218309859154926	0.07570422535211263	0.073943661971831	0.079225352112676	0.07746478873239437	0.08450704225352113	0.02464788732394363	0.08098591549295775	0.040492957746478875	0.08098591549295775	0.08274647887323938	0.08978873239436624	0.08098591549295775	0.028169014084507005	0.08978873239436624
EPI_ISL_16208999	0.08626760563380287	0.12676056338028174	0.07746478873239437	0.079225352112676	0.08450704225352113	0.07746478873239437	0.079225352112676	0.08274647887323938	0.07746478873239437	0.09154929577464788	0.09507042253521125	0.08978873239436624	0.07570422535211263	0.0880281690140845	0.08626760563380287	0.09507042253521125	0.08274647887323938	0.014084507042253502	0.052816901408450745	0.03169014084507038	0.07042253521126762	0.052816901408450745	0.045774647887323994	0.008802816901408494	0.079225352112676	0.08274647887323938	0.0880281690140845	0.073943661971831	0.07570422535211263	0.08450704225352113	0.07570422535211263	0.08098591549295775	0.0880281690140845	0.08274647887323938	0.06338028169014087	0.07746478873239437	0.0880281690140845	0.08450704225352113	0.08626760563380287	0.0880281690140845	0.09154929577464788	0.08098591549295775	0.073943661971831	0.08978873239436624	0.09154929577464788	0.01936619718309862	0.0880281690140845	0.08450704225352113	0.021126760563380254
EPI_ISL_284651	0.08978873239436624	0.13556338028169013	0.08450704225352113	0.08450704225352113	0.09859154929577463	0.08098591549295775	0.08450704225352113	0.0880281690140845	0.079225352112676	0.08978873239436624	0.096830985915493	0.09154929577464788	0.08626760563380287	0.09154929577464788	0.09507042253521125	0.10035211267605637	0.09154929577464788	0.05457746478873238	0.029929577464788748	0.0369718309859155	0.05457746478873238	0.03873239436619713	0.0369718309859155	0.04929577464788737	0.09330985915492962	0.0880281690140845	0.096830985915493	0.08274647887323938	0.08274647887323938	0.09330985915492962	0.08274647887323938	0.08450704225352113	0.08626760563380287	0.096830985915493	0.07042253521126762	0.08626760563380287	0.08978873239436624	0.09330985915492962	0.08626760563380287	0.09507042253521125	0.10035211267605637	0.09330985915492962	0.08274647887323938	0.09507042253521125	0.096830985915493	0.05633802816901412	0.08978873239436624	0.09330985915492962	0.05809859154929575
EPI_ISL_206569	0.08626760563380287	0.13028169014084512	0.07746478873239437	0.07746478873239437	0.09154929577464788	0.073943661971831	0.08274647887323938	0.0880281690140845	0.07218309859154926	0.08274647887323938	0.08978873239436624	0.08450704225352113	0.073943661971831	0.08098591549295775	0.08274647887323938	0.09859154929577463	0.079225352112676	0.03873239436619713	0.01232394366197187	0.02464788732394363	0.04225352112676062	0.021126760563380254	0.02464788732394363	0.033450704225352124	0.08626760563380287	0.0880281690140845	0.08978873239436624	0.07218309859154926	0.07570422535211263	0.08626760563380287	0.07570422535211263	0.08274647887323938	0.08274647887323938	0.08274647887323938	0.06161971830985913	0.08098591549295775	0.08274647887323938	0.08450704225352113	0.08098591549295775	0.09330985915492962	0.08978873239436624	0.08626760563380287	0.07218309859154926	0.0880281690140845	0.08978873239436624	0.04401408450704225	0.08274647887323938	0.08098591549295775	0.045774647887323994
EPI_ISL_19145644	0.09859154929577463	0.1390845070422535	0.09507042253521125	0.102112676056338	0.10739436619718312	0.08978873239436624	0.10035211267605637	0.10387323943661975	0.08626760563380287	0.09507042253521125	0.11267605633802813	0.09507042253521125	0.08626760563380287	0.09330985915492962	0.096830985915493	0.1161971830985915	0.08978873239436624	0.07218309859154926	0.047535211267605626	0.059859154929577496	0.029929577464788748	0.06161971830985913	0.05633802816901412	0.06690140845070425	0.10739436619718312	0.10387323943661975	0.10563380281690138	0.08978873239436624	0.09330985915492962	0.10739436619718312	0.09330985915492962	0.10035211267605637	0.102112676056338	0.096830985915493	0.08098591549295775	0.09507042253521125	0.096830985915493	0.09859154929577463	0.09507042253521125	0.10915492957746475	0.10387323943661975	0.09507042253521125	0.08626760563380287	0.102112676056338	0.10387323943661975	0.07570422535211263	0.09507042253521125	0.096830985915493	0.073943661971831
EPI_ISL_337280	0.09330985915492962	0.1390845070422535	0.08978873239436624	0.09330985915492962	0.10387323943661975	0.08274647887323938	0.09330985915492962	0.096830985915493	0.08098591549295775	0.09154929577464788	0.10739436619718312	0.09154929577464788	0.07746478873239437	0.0880281690140845	0.0880281690140845	0.11443661971830987	0.08450704225352113	0.06690140845070425	0.04401408450704225	0.05457746478873238	0.015845070422535246	0.05457746478873238	0.05633802816901412	0.06161971830985913	0.102112676056338	0.096830985915493	0.10387323943661975	0.08274647887323938	0.0880281690140845	0.102112676056338	0.0880281690140845	0.096830985915493	0.096830985915493	0.08978873239436624	0.079225352112676	0.09154929577464788	0.09154929577464788	0.09330985915492962	0.08978873239436624	0.10387323943661975	0.09330985915492962	0.09507042253521125	0.07746478873239437	0.096830985915493	0.096830985915493	0.06866197183098588	0.09154929577464788	0.0880281690140845	0.073943661971831
EPI_ISL_337276	0.10035211267605637	0.1390845070422535	0.09859154929577463	0.10387323943661975	0.11267605633802813	0.09154929577464788	0.09859154929577463	0.102112676056338	0.0880281690140845	0.09859154929577463	0.11267605633802813	0.096830985915493	0.0880281690140845	0.09859154929577463	0.09859154929577463	0.11971830985915488	0.09507042253521125	0.07746478873239437	0.052816901408450745	0.0651408450704225	0.015845070422535246	0.06866197183098588	0.06690140845070425	0.07218309859154926	0.1109154929577465	0.102112676056338	0.1109154929577465	0.09154929577464788	0.096830985915493	0.1109154929577465	0.096830985915493	0.10035211267605637	0.10387323943661975	0.096830985915493	0.08450704225352113	0.09859154929577463	0.09859154929577463	0.09859154929577463	0.096830985915493	0.10739436619718312	0.10387323943661975	0.10035211267605637	0.0880281690140845	0.10387323943661975	0.10387323943661975	0.079225352112676	0.096830985915493	0.09859154929577463	0.08098591549295775
EPI_ISL_200838	0.09330985915492962	0.1390845070422535	0.08978873239436624	0.0880281690140845	0.102112676056338	0.08274647887323938	0.09154929577464788	0.096830985915493	0.08098591549295775	0.09154929577464788	0.102112676056338	0.09330985915492962	0.08626760563380287	0.09330985915492962	0.09507042253521125	0.1109154929577465	0.08978873239436624	0.04929577464788737	0.02464788732394363	0.0369718309859155	0.051056338028169	0.033450704225352124	0.03873239436619713	0.045774647887323994	0.096830985915493	0.096830985915493	0.09859154929577463	0.08450704225352113	0.0880281690140845	0.096830985915493	0.08450704225352113	0.09154929577464788	0.09507042253521125	0.09507042253521125	0.07570422535211263	0.09154929577464788	0.09154929577464788	0.09330985915492962	0.08978873239436624	0.102112676056338	0.10035211267605637	0.09507042253521125	0.08450704225352113	0.096830985915493	0.09859154929577463	0.05457746478873238	0.09330985915492962	0.09330985915492962	0.05809859154929575
EPI_ISL_3770721	0.096830985915493	0.13732394366197187	0.09330985915492962	0.096830985915493	0.10563380281690138	0.0880281690140845	0.096830985915493	0.102112676056338	0.08626760563380287	0.096830985915493	0.10739436619718312	0.09859154929577463	0.09154929577464788	0.10035211267605637	0.10563380281690138	0.1109154929577465	0.102112676056338	0.06690140845070425	0.045774647887323994	0.05633802816901412	0.033450704225352124	0.05633802816901412	0.051056338028169	0.06161971830985913	0.10387323943661975	0.102112676056338	0.102112676056338	0.08978873239436624	0.09154929577464788	0.102112676056338	0.0880281690140845	0.096830985915493	0.102112676056338	0.10387323943661975	0.08098591549295775	0.09507042253521125	0.096830985915493	0.09859154929577463	0.09507042253521125	0.10739436619718312	0.1109154929577465	0.09507042253521125	0.09330985915492962	0.102112676056338	0.102112676056338	0.06866197183098588	0.09859154929577463	0.09859154929577463	0.07218309859154926
EPI_ISL_207048	0.08978873239436624	0.13204225352112675	0.09154929577464788	0.09154929577464788	0.10563380281690138	0.08450704225352113	0.09330985915492962	0.09859154929577463	0.08274647887323938	0.09330985915492962	0.10387323943661975	0.09507042253521125	0.0880281690140845	0.09154929577464788	0.09330985915492962	0.10739436619718312	0.09154929577464788	0.05633802816901412	0.033450704225352124	0.03873239436619713	0.05809859154929575	0.040492957746478875	0.035211267605633756	0.051056338028169	0.10035211267605637	0.09859154929577463	0.10387323943661975	0.0880281690140845	0.08978873239436624	0.10035211267605637	0.08450704225352113	0.09330985915492962	0.096830985915493	0.10035211267605637	0.07570422535211263	0.09330985915492962	0.09330985915492962	0.09507042253521125	0.09154929577464788	0.10387323943661975	0.10387323943661975	0.09330985915492962	0.08626760563380287	0.09859154929577463	0.10035211267605637	0.06161971830985913	0.09507042253521125	0.09154929577464788	0.06338028169014087
EPI_ISL_221721	0.0880281690140845	0.13204225352112675	0.079225352112676	0.079225352112676	0.09330985915492962	0.07570422535211263	0.08450704225352113	0.08978873239436624	0.07218309859154926	0.08274647887323938	0.08978873239436624	0.08450704225352113	0.07570422535211263	0.08274647887323938	0.08450704225352113	0.10035211267605637	0.08098591549295775	0.040492957746478875	0.010563380281690127	0.026408450704225372	0.04401408450704225	0.022887323943661997	0.026408450704225372	0.035211267605633756	0.0880281690140845	0.08978873239436624	0.09154929577464788	0.073943661971831	0.07746478873239437	0.0880281690140845	0.07746478873239437	0.08450704225352113	0.08450704225352113	0.08098591549295775	0.06338028169014087	0.08098591549295775	0.08274647887323938	0.08450704225352113	0.08098591549295775	0.09330985915492962	0.09154929577464788	0.08626760563380287	0.073943661971831	0.0880281690140845	0.08978873239436624	0.045774647887323994	0.08274647887323938	0.08274647887323938	0.045774647887323994
EPI_ISL_266596	0.079225352112676	0.125	0.07042253521126762	0.07218309859154926	0.08626760563380287	0.06690140845070425	0.073943661971831	0.079225352112676	0.0651408450704225	0.079225352112676	0.08450704225352113	0.07746478873239437	0.0651408450704225	0.08274647887323938	0.08098591549295775	0.08978873239436624	0.073943661971831	0.035211267605633756	0.040492957746478875	0.01232394366197187	0.06338028169014087	0.040492957746478875	0.03873239436619713	0.029929577464788748	0.08098591549295775	0.079225352112676	0.08450704225352113	0.0651408450704225	0.06866197183098588	0.08098591549295775	0.07042253521126762	0.073943661971831	0.079225352112676	0.08450704225352113	0.05457746478873238	0.07042253521126762	0.07570422535211263	0.07746478873239437	0.073943661971831	0.08098591549295775	0.08450704225352113	0.07746478873239437	0.06690140845070425	0.079225352112676	0.08098591549295775	0.040492957746478875	0.07570422535211263	0.073943661971831	0.04225352112676062
EPI_ISL_196101	0.0880281690140845	0.13204225352112675	0.07570422535211263	0.07570422535211263	0.08978873239436624	0.07570422535211263	0.08274647887323938	0.0880281690140845	0.073943661971831	0.08450704225352113	0.09154929577464788	0.08626760563380287	0.07570422535211263	0.08274647887323938	0.08450704225352113	0.10035211267605637	0.08098591549295775	0.040492957746478875	0.015845070422535246	0.026408450704225372	0.045774647887323994	0.01936619718309862	0.026408450704225372	0.035211267605633756	0.08450704225352113	0.0880281690140845	0.0880281690140845	0.073943661971831	0.073943661971831	0.08626760563380287	0.07746478873239437	0.08274647887323938	0.08450704225352113	0.08450704225352113	0.06338028169014087	0.08274647887323938	0.08450704225352113	0.08626760563380287	0.079225352112676	0.09507042253521125	0.09154929577464788	0.0880281690140845	0.073943661971831	0.08978873239436624	0.09154929577464788	0.045774647887323994	0.08450704225352113	0.08274647887323938	0.047535211267605626
EPI_ISL_14174437	0.09859154929577463	0.14436619718309862	0.09507042253521125	0.09859154929577463	0.10563380281690138	0.0880281690140845	0.09859154929577463	0.102112676056338	0.08626760563380287	0.096830985915493	0.11267605633802813	0.096830985915493	0.08626760563380287	0.09330985915492962	0.09330985915492962	0.11971830985915488	0.09330985915492962	0.06866197183098588	0.04929577464788737	0.059859154929577496	0.017605633802816878	0.059859154929577496	0.06161971830985913	0.06338028169014087	0.10387323943661975	0.102112676056338	0.10915492957746475	0.0880281690140845	0.09330985915492962	0.10387323943661975	0.09330985915492962	0.09859154929577463	0.102112676056338	0.09507042253521125	0.08274647887323938	0.096830985915493	0.096830985915493	0.09859154929577463	0.09507042253521125	0.10915492957746475	0.09859154929577463	0.10035211267605637	0.08626760563380287	0.102112676056338	0.102112676056338	0.07042253521126762	0.096830985915493	0.096830985915493	0.07218309859154926
EPI_ISL_502208	0.09330985915492962	0.1390845070422535	0.08978873239436624	0.09330985915492962	0.10387323943661975	0.08274647887323938	0.09330985915492962	0.096830985915493	0.08098591549295775	0.09154929577464788	0.10739436619718312	0.09154929577464788	0.08098591549295775	0.09154929577464788	0.09154929577464788	0.11443661971830987	0.0880281690140845	0.0651408450704225	0.04225352112676062	0.052816901408450745	0.010563380281690127	0.052816901408450745	0.05457746478873238	0.059859154929577496	0.102112676056338	0.096830985915493	0.10387323943661975	0.08274647887323938	0.0880281690140845	0.102112676056338	0.0880281690140845	0.09330985915492962	0.096830985915493	0.09330985915492962	0.07570422535211263	0.09154929577464788	0.09154929577464788	0.09330985915492962	0.08978873239436624	0.10387323943661975	0.096830985915493	0.09507042253521125	0.08098591549295775	0.096830985915493	0.096830985915493	0.06690140845070425	0.09154929577464788	0.09154929577464788	0.07218309859154926
EPI_ISL_332439	0.08274647887323938	0.125	0.073943661971831	0.07218309859154926	0.08450704225352113	0.07218309859154926	0.07570422535211263	0.08098591549295775	0.07042253521126762	0.08450704225352113	0.0880281690140845	0.08274647887323938	0.07042253521126762	0.08274647887323938	0.08274647887323938	0.09507042253521125	0.079225352112676	0.014084507042253502	0.040492957746478875	0.022887323943661997	0.06338028169014087	0.04225352112676062	0.0369718309859155	0.008802816901408494	0.079225352112676	0.08098591549295775	0.08450704225352113	0.06866197183098588	0.07218309859154926	0.08098591549295775	0.07218309859154926	0.07570422535211263	0.08450704225352113	0.079225352112676	0.06161971830985913	0.07218309859154926	0.08098591549295775	0.08098591549295775	0.079225352112676	0.08450704225352113	0.09330985915492962	0.079225352112676	0.06866197183098588	0.08274647887323938	0.08450704225352113	0.01936619718309862	0.08098591549295775	0.08098591549295775	0.017605633802816878
EPI_ISL_697211	0.09330985915492962	0.13732394366197187	0.08626760563380287	0.08978873239436624	0.09859154929577463	0.08274647887323938	0.0880281690140845	0.09330985915492962	0.079225352112676	0.08978873239436624	0.096830985915493	0.09154929577464788	0.08626760563380287	0.09330985915492962	0.096830985915493	0.10563380281690138	0.09154929577464788	0.05457746478873238	0.017605633802816878	0.04225352112676062	0.051056338028169	0.0369718309859155	0.040492957746478875	0.04929577464788737	0.09507042253521125	0.09330985915492962	0.09859154929577463	0.08450704225352113	0.08450704225352113	0.09507042253521125	0.08274647887323938	0.0880281690140845	0.09507042253521125	0.09330985915492962	0.073943661971831	0.0880281690140845	0.08978873239436624	0.09154929577464788	0.08626760563380287	0.096830985915493	0.09859154929577463	0.09154929577464788	0.08450704225352113	0.09507042253521125	0.096830985915493	0.059859154929577496	0.09154929577464788	0.09330985915492962	0.05809859154929575
EPI_ISL_4031450	0.09330985915492962	0.13204225352112675	0.08450704225352113	0.08626760563380287	0.09859154929577463	0.08098591549295775	0.08978873239436624	0.09154929577464788	0.07746478873239437	0.0880281690140845	0.08978873239436624	0.08978873239436624	0.07746478873239437	0.08450704225352113	0.08626760563380287	0.10563380281690138	0.08274647887323938	0.04929577464788737	0.026408450704225372	0.040492957746478875	0.051056338028169	0.033450704225352124	0.040492957746478875	0.04401408450704225	0.09330985915492962	0.09330985915492962	0.096830985915493	0.079225352112676	0.08274647887323938	0.09330985915492962	0.08274647887323938	0.09330985915492962	0.08978873239436624	0.08274647887323938	0.07042253521126762	0.08626760563380287	0.0880281690140845	0.08978873239436624	0.08626760563380287	0.09859154929577463	0.09330985915492962	0.09154929577464788	0.07570422535211263	0.09330985915492962	0.09507042253521125	0.05457746478873238	0.0880281690140845	0.08450704225352113	0.05457746478873238
EPI_ISL_17768811	0.09507042253521125	0.13028169014084512	0.08450704225352113	0.08626760563380287	0.09859154929577463	0.079225352112676	0.08626760563380287	0.09154929577464788	0.08098591549295775	0.09507042253521125	0.09859154929577463	0.096830985915493	0.08626760563380287	0.08978873239436624	0.09154929577464788	0.102112676056338	0.08978873239436624	0.05809859154929575	0.035211267605633756	0.04225352112676062	0.05457746478873238	0.01232394366197187	0.040492957746478875	0.052816901408450745	0.09330985915492962	0.09154929577464788	0.09507042253521125	0.08098591549295775	0.08274647887323938	0.09330985915492962	0.08450704225352113	0.08626760563380287	0.08978873239436624	0.09507042253521125	0.073943661971831	0.08978873239436624	0.09154929577464788	0.09154929577464788	0.0880281690140845	0.09859154929577463	0.096830985915493	0.08978873239436624	0.08450704225352113	0.096830985915493	0.09859154929577463	0.06338028169014087	0.09507042253521125	0.08978873239436624	0.06161971830985913
EPI_ISL_6795265	0.102112676056338	0.14084507042253525	0.096830985915493	0.102112676056338	0.1109154929577465	0.08978873239436624	0.09859154929577463	0.102112676056338	0.0880281690140845	0.09859154929577463	0.11267605633802813	0.096830985915493	0.08626760563380287	0.09507042253521125	0.09507042253521125	0.11971830985915488	0.09154929577464788	0.07218309859154926	0.051056338028169	0.059859154929577496	0.014084507042253502	0.06161971830985913	0.059859154929577496	0.06690140845070425	0.10915492957746475	0.102112676056338	0.10915492957746475	0.08978873239436624	0.09507042253521125	0.10915492957746475	0.09507042253521125	0.10035211267605637	0.10035211267605637	0.09859154929577463	0.08274647887323938	0.09859154929577463	0.09859154929577463	0.10035211267605637	0.096830985915493	0.10915492957746475	0.10035211267605637	0.09859154929577463	0.08626760563380287	0.10387323943661975	0.10387323943661975	0.073943661971831	0.096830985915493	0.09507042253521125	0.07746478873239437
EPI_ISL_173146	0.0880281690140845	0.12147887323943662	0.07042253521126762	0.07042253521126762	0.079225352112676	0.07042253521126762	0.073943661971831	0.08274647887323938	0.06866197183098588	0.07570422535211263	0.08274647887323938	0.079225352112676	0.033450704225352124	0.0369718309859155	0.0035211267605633756	0.096830985915493	0.028169014084507005	0.08450704225352113	0.08978873239436624	0.08098591549295775	0.09507042253521125	0.08978873239436624	0.08098591549295775	0.079225352112676	0.07570422535211263	0.08274647887323938	0.08450704225352113	0.0651408450704225	0.06866197183098588	0.07746478873239437	0.07746478873239437	0.08098591549295775	0.07570422535211263	0.052816901408450745	0.07042253521126762	0.073943661971831	0.06866197183098588	0.073943661971831	0.073943661971831	0.08626760563380287	0.029929577464788748	0.07746478873239437	0.033450704225352124	0.07570422535211263	0.07746478873239437	0.08626760563380287	0.07746478873239437	0.01936619718309862	0.08626760563380287
EPI_ISL_230758	0.08978873239436624	0.13028169014084512	0.08098591549295775	0.08098591549295775	0.09507042253521125	0.07746478873239437	0.08626760563380287	0.09154929577464788	0.07570422535211263	0.08626760563380287	0.09330985915492962	0.0880281690140845	0.07570422535211263	0.08274647887323938	0.08450704225352113	0.10035211267605637	0.08098591549295775	0.04225352112676062	0.021126760563380254	0.028169014084507005	0.04929577464788737	0.026408450704225372	0.028169014084507005	0.0369718309859155	0.08978873239436624	0.09154929577464788	0.09330985915492962	0.07570422535211263	0.079225352112676	0.08978873239436624	0.079225352112676	0.08626760563380287	0.08626760563380287	0.08450704225352113	0.06690140845070425	0.08450704225352113	0.08626760563380287	0.0880281690140845	0.08450704225352113	0.096830985915493	0.09154929577464788	0.08978873239436624	0.073943661971831	0.09154929577464788	0.09330985915492962	0.047535211267605626	0.08626760563380287	0.08274647887323938	0.04929577464788737
EPI_ISL_199290	0.09154929577464788	0.13556338028169013	0.08274647887323938	0.08274647887323938	0.096830985915493	0.079225352112676	0.0880281690140845	0.09330985915492962	0.07746478873239437	0.0880281690140845	0.09507042253521125	0.08978873239436624	0.079225352112676	0.08626760563380287	0.08978873239436624	0.10387323943661975	0.08450704225352113	0.045774647887323994	0.017605633802816878	0.029929577464788748	0.04929577464788737	0.02464788732394363	0.03169014084507038	0.040492957746478875	0.09154929577464788	0.09330985915492962	0.09507042253521125	0.07746478873239437	0.08098591549295775	0.09154929577464788	0.08098591549295775	0.0880281690140845	0.0880281690140845	0.0880281690140845	0.06690140845070425	0.08626760563380287	0.0880281690140845	0.08978873239436624	0.08626760563380287	0.09859154929577463	0.09507042253521125	0.0880281690140845	0.07746478873239437	0.09330985915492962	0.09507042253521125	0.051056338028169	0.0880281690140845	0.08626760563380287	0.052816901408450745
EPI_ISL_2081528	0.0880281690140845	0.12676056338028174	0.08098591549295775	0.079225352112676	0.09154929577464788	0.079225352112676	0.079225352112676	0.08626760563380287	0.079225352112676	0.09330985915492962	0.096830985915493	0.09154929577464788	0.07746478873239437	0.08626760563380287	0.08274647887323938	0.10035211267605637	0.08274647887323938	0.008802816901408494	0.04929577464788737	0.03169014084507038	0.06690140845070425	0.047535211267605626	0.04225352112676062	0.0035211267605633756	0.08274647887323938	0.08626760563380287	0.09154929577464788	0.07570422535211263	0.079225352112676	0.0880281690140845	0.07746478873239437	0.08098591549295775	0.0880281690140845	0.08450704225352113	0.06690140845070425	0.08098591549295775	0.08978873239436624	0.08978873239436624	0.0880281690140845	0.08978873239436624	0.09330985915492962	0.08450704225352113	0.07570422535211263	0.09154929577464788	0.09330985915492962	0.014084507042253502	0.08978873239436624	0.08450704225352113	0.015845070422535246
EPI_ISL_4805852	0.0880281690140845	0.13028169014084512	0.079225352112676	0.07746478873239437	0.08978873239436624	0.07746478873239437	0.07746478873239437	0.08450704225352113	0.07746478873239437	0.09154929577464788	0.09507042253521125	0.08978873239436624	0.07570422535211263	0.0880281690140845	0.08098591549295775	0.10035211267605637	0.08098591549295775	0.007042253521126751	0.047535211267605626	0.029929577464788748	0.0651408450704225	0.047535211267605626	0.040492957746478875	0.0017605633802817433	0.08098591549295775	0.08450704225352113	0.08978873239436624	0.073943661971831	0.07746478873239437	0.08626760563380287	0.07746478873239437	0.079225352112676	0.08626760563380287	0.08626760563380287	0.0651408450704225	0.079225352112676	0.0880281690140845	0.0880281690140845	0.08626760563380287	0.0880281690140845	0.09154929577464788	0.08274647887323938	0.073943661971831	0.08978873239436624	0.09154929577464788	0.01232394366197187	0.0880281690140845	0.079225352112676	0.014084507042253502
EPI_ISL_4805936	0.08626760563380287	0.13028169014084512	0.07746478873239437	0.07746478873239437	0.08978873239436624	0.07570422535211263	0.07746478873239437	0.08450704225352113	0.07570422535211263	0.08978873239436624	0.09330985915492962	0.09154929577464788	0.073943661971831	0.08626760563380287	0.08274647887323938	0.09859154929577463	0.079225352112676	0.008802816901408494	0.045774647887323994	0.03169014084507038	0.06338028169014087	0.045774647887323994	0.03873239436619713	0.0035211267605633756	0.08098591549295775	0.08450704225352113	0.08978873239436624	0.07218309859154926	0.07570422535211263	0.08626760563380287	0.07570422535211263	0.079225352112676	0.08450704225352113	0.08450704225352113	0.06690140845070425	0.08098591549295775	0.08626760563380287	0.08626760563380287	0.08450704225352113	0.0880281690140845	0.09330985915492962	0.08098591549295775	0.07218309859154926	0.08978873239436624	0.09154929577464788	0.014084507042253502	0.08978873239436624	0.08098591549295775	0.015845070422535246
EPI_ISL_4804850	0.08450704225352113	0.12852112676056338	0.07570422535211263	0.07570422535211263	0.0880281690140845	0.073943661971831	0.07570422535211263	0.08274647887323938	0.073943661971831	0.0880281690140845	0.09154929577464788	0.08978873239436624	0.07570422535211263	0.0880281690140845	0.08450704225352113	0.096830985915493	0.08098591549295775	0.010563380281690127	0.045774647887323994	0.03169014084507038	0.06338028169014087	0.045774647887323994	0.03873239436619713	0.005281690140845119	0.079225352112676	0.08274647887323938	0.0880281690140845	0.07042253521126762	0.073943661971831	0.08450704225352113	0.073943661971831	0.07746478873239437	0.08274647887323938	0.08626760563380287	0.06866197183098588	0.079225352112676	0.08450704225352113	0.08450704225352113	0.08274647887323938	0.08626760563380287	0.09507042253521125	0.079225352112676	0.073943661971831	0.0880281690140845	0.08978873239436624	0.015845070422535246	0.0880281690140845	0.08274647887323938	0.017605633802816878
EPI_ISL_255191	0.08450704225352113	0.12676056338028174	0.07570422535211263	0.073943661971831	0.08274647887323938	0.073943661971831	0.07746478873239437	0.08274647887323938	0.073943661971831	0.0880281690140845	0.09154929577464788	0.08626760563380287	0.07218309859154926	0.08450704225352113	0.08450704225352113	0.09507042253521125	0.08098591549295775	0.015845070422535246	0.04401408450704225	0.021126760563380254	0.0651408450704225	0.04401408450704225	0.03873239436619713	0.010563380281690127	0.08098591549295775	0.08274647887323938	0.08626760563380287	0.07042253521126762	0.073943661971831	0.08274647887323938	0.073943661971831	0.07746478873239437	0.08626760563380287	0.08274647887323938	0.06338028169014087	0.07570422535211263	0.08450704225352113	0.08450704225352113	0.08274647887323938	0.08626760563380287	0.09507042253521125	0.08274647887323938	0.07042253521126762	0.08626760563380287	0.0880281690140845	0.021126760563380254	0.08450704225352113	0.08274647887323938	0.022887323943661997
EPI_ISL_206445	0.08978873239436624	0.13204225352112675	0.08098591549295775	0.08098591549295775	0.09507042253521125	0.079225352112676	0.08978873239436624	0.09507042253521125	0.07746478873239437	0.09154929577464788	0.09859154929577463	0.09330985915492962	0.079225352112676	0.08450704225352113	0.08450704225352113	0.09507042253521125	0.079225352112676	0.045774647887323994	0.0369718309859155	0.035211267605633756	0.06338028169014087	0.03873239436619713	0.0017605633802817433	0.040492957746478875	0.08978873239436624	0.09507042253521125	0.09330985915492962	0.07746478873239437	0.079225352112676	0.08450704225352113	0.079225352112676	0.08978873239436624	0.0880281690140845	0.09154929577464788	0.07042253521126762	0.08450704225352113	0.0880281690140845	0.0880281690140845	0.08626760563380287	0.10035211267605637	0.09507042253521125	0.08626760563380287	0.07746478873239437	0.09154929577464788	0.09330985915492962	0.051056338028169	0.09154929577464788	0.08274647887323938	0.052816901408450745
EPI_ISL_206492	0.08274647887323938	0.12676056338028174	0.07570422535211263	0.073943661971831	0.0880281690140845	0.073943661971831	0.07746478873239437	0.08274647887323938	0.073943661971831	0.0880281690140845	0.09154929577464788	0.08626760563380287	0.07218309859154926	0.08098591549295775	0.08450704225352113	0.09507042253521125	0.08098591549295775	0.026408450704225372	0.040492957746478875	0.021126760563380254	0.0651408450704225	0.040492957746478875	0.035211267605633756	0.021126760563380254	0.08098591549295775	0.08274647887323938	0.08626760563380287	0.07042253521126762	0.073943661971831	0.08274647887323938	0.07218309859154926	0.07746478873239437	0.08450704225352113	0.079225352112676	0.059859154929577496	0.07570422535211263	0.08450704225352113	0.08450704225352113	0.08274647887323938	0.0880281690140845	0.09154929577464788	0.08274647887323938	0.07042253521126762	0.08626760563380287	0.0880281690140845	0.03169014084507038	0.08450704225352113	0.08274647887323938	0.033450704225352124
EPI_ISL_369366	0.08450704225352113	0.12676056338028174	0.073943661971831	0.073943661971831	0.08626760563380287	0.073943661971831	0.07746478873239437	0.08274647887323938	0.07218309859154926	0.08626760563380287	0.08978873239436624	0.08450704225352113	0.07218309859154926	0.08450704225352113	0.08450704225352113	0.096830985915493	0.08098591549295775	0.01936619718309862	0.040492957746478875	0.02464788732394363	0.06161971830985913	0.04401408450704225	0.03873239436619713	0.014084507042253502	0.08098591549295775	0.08274647887323938	0.08626760563380287	0.07042253521126762	0.073943661971831	0.08274647887323938	0.073943661971831	0.07746478873239437	0.08626760563380287	0.079225352112676	0.06338028169014087	0.073943661971831	0.08274647887323938	0.08274647887323938	0.08098591549295775	0.08626760563380287	0.09507042253521125	0.08098591549295775	0.07042253521126762	0.08450704225352113	0.08626760563380287	0.02464788732394363	0.08274647887323938	0.08274647887323938	0.02464788732394363
HK08|2.3.4	0.08274647887323938	0.09859154929577463	0.06866197183098588	0.07042253521126762	0.08274647887323938	0.06161971830985913	0.0651408450704225	0.07746478873239437	0.06161971830985913	0.07218309859154926	0.07570422535211263	0.07570422535211263	0.0651408450704225	0.07746478873239437	0.079225352112676	0.0880281690140845	0.07570422535211263	0.08450704225352113	0.08626760563380287	0.07218309859154926	0.10035211267605637	0.08626760563380287	0.08274647887323938	0.079225352112676	0.07746478873239437	0.07746478873239437	0.08274647887323938	0.06161971830985913	0.06690140845070425	0.079225352112676	0.07218309859154926	0.0651408450704225	0.06690140845070425	0.09154929577464788	0.04929577464788737	0.07042253521126762	0.07218309859154926	0.07042253521126762	0.06338028169014087	0.073943661971831	0.08978873239436624	0.07570422535211263	0.06690140845070425	0.073943661971831	0.07570422535211263	0.08274647887323938	0.073943661971831	0.08098591549295775	0.08626760563380287
EPI_ISL_343411	0.06338028169014087	0.10915492957746475	0.04929577464788737	0.05457746478873238	0.0651408450704225	0.03873239436619713	0.021126760563380254	0.03169014084507038	0.052816901408450745	0.0651408450704225	0.07218309859154926	0.0651408450704225	0.06338028169014087	0.08274647887323938	0.08274647887323938	0.07570422535211263	0.08098591549295775	0.09330985915492962	0.10035211267605637	0.08978873239436624	0.1109154929577465	0.10035211267605637	0.102112676056338	0.09154929577464788	0.06338028169014087	0.029929577464788748	0.06690140845070425	0.04929577464788737	0.047535211267605626	0.059859154929577496	0.05633802816901412	0.02464788732394363	0.04401408450704225	0.08978873239436624	0.06338028169014087	0.051056338028169	0.0651408450704225	0.059859154929577496	0.05457746478873238	0.040492957746478875	0.0880281690140845	0.06338028169014087	0.07042253521126762	0.059859154929577496	0.06161971830985913	0.09154929577464788	0.0651408450704225	0.079225352112676	0.096830985915493
EPI_ISL_221723	0.0880281690140845	0.12852112676056338	0.07218309859154926	0.07218309859154926	0.08626760563380287	0.07218309859154926	0.07570422535211263	0.08098591549295775	0.07042253521126762	0.08450704225352113	0.08450704225352113	0.08626760563380287	0.07218309859154926	0.08098591549295775	0.08098591549295775	0.09859154929577463	0.07746478873239437	0.040492957746478875	0.022887323943661997	0.026408450704225372	0.052816901408450745	0.01936619718309862	0.026408450704225372	0.035211267605633756	0.08098591549295775	0.08098591549295775	0.08450704225352113	0.07218309859154926	0.07042253521126762	0.08098591549295775	0.07746478873239437	0.07570422535211263	0.07746478873239437	0.08274647887323938	0.05633802816901412	0.07746478873239437	0.08098591549295775	0.08274647887323938	0.073943661971831	0.0880281690140845	0.08450704225352113	0.08450704225352113	0.07042253521126762	0.08626760563380287	0.0880281690140845	0.045774647887323994	0.08450704225352113	0.079225352112676	0.047535211267605626
EPI_ISL_369825	0.09330985915492962	0.12676056338028174	0.079225352112676	0.079225352112676	0.09154929577464788	0.073943661971831	0.079225352112676	0.08450704225352113	0.073943661971831	0.08450704225352113	0.08450704225352113	0.08626760563380287	0.08098591549295775	0.08626760563380287	0.09330985915492962	0.096830985915493	0.08978873239436624	0.08098591549295775	0.08098591549295775	0.07218309859154926	0.102112676056338	0.08274647887323938	0.08274647887323938	0.07570422535211263	0.08450704225352113	0.08450704225352113	0.09154929577464788	0.073943661971831	0.07746478873239437	0.0880281690140845	0.079225352112676	0.079225352112676	0.079225352112676	0.09330985915492962	0.059859154929577496	0.08098591549295775	0.08274647887323938	0.08450704225352113	0.07570422535211263	0.08274647887323938	0.102112676056338	0.08626760563380287	0.073943661971831	0.08450704225352113	0.08626760563380287	0.08098591549295775	0.08450704225352113	0.09154929577464788	0.08274647887323938
EPI_ISL_16466440	0.08978873239436624	0.13556338028169013	0.08450704225352113	0.08450704225352113	0.096830985915493	0.08274647887323938	0.08626760563380287	0.08978873239436624	0.08274647887323938	0.096830985915493	0.09859154929577463	0.09859154929577463	0.08274647887323938	0.09507042253521125	0.09330985915492962	0.10387323943661975	0.08978873239436624	0.022887323943661997	0.051056338028169	0.03873239436619713	0.06866197183098588	0.051056338028169	0.04401408450704225	0.017605633802816878	0.0880281690140845	0.08978873239436624	0.096830985915493	0.079225352112676	0.08274647887323938	0.09330985915492962	0.08274647887323938	0.08450704225352113	0.0880281690140845	0.09154929577464788	0.07746478873239437	0.0880281690140845	0.09330985915492962	0.09154929577464788	0.09154929577464788	0.096830985915493	0.102112676056338	0.0880281690140845	0.08098591549295775	0.096830985915493	0.09859154929577463	0.028169014084507005	0.096830985915493	0.09154929577464788	0.029929577464788748
EPI_ISL_240704	0.0880281690140845	0.13204225352112675	0.07746478873239437	0.079225352112676	0.09154929577464788	0.07570422535211263	0.08274647887323938	0.08450704225352113	0.073943661971831	0.0880281690140845	0.09154929577464788	0.08978873239436624	0.07570422535211263	0.08450704225352113	0.08626760563380287	0.09330985915492962	0.08098591549295775	0.04401408450704225	0.02464788732394363	0.028169014084507005	0.051056338028169	0.021126760563380254	0.03169014084507038	0.03873239436619713	0.08626760563380287	0.08450704225352113	0.08978873239436624	0.073943661971831	0.07570422535211263	0.08626760563380287	0.07746478873239437	0.08274647887323938	0.08450704225352113	0.08626760563380287	0.0651408450704225	0.08274647887323938	0.08450704225352113	0.08626760563380287	0.08098591549295775	0.09507042253521125	0.09154929577464788	0.0880281690140845	0.073943661971831	0.08978873239436624	0.09154929577464788	0.04929577464788737	0.0880281690140845	0.08274647887323938	0.051056338028169
EPI_ISL_295520	0.09330985915492962	0.13732394366197187	0.08098591549295775	0.08098591549295775	0.096830985915493	0.08098591549295775	0.08626760563380287	0.09330985915492962	0.079225352112676	0.08978873239436624	0.096830985915493	0.09154929577464788	0.07746478873239437	0.08450704225352113	0.07218309859154926	0.10563380281690138	0.07218309859154926	0.045774647887323994	0.03169014084507038	0.03873239436619713	0.051056338028169	0.033450704225352124	0.03873239436619713	0.040492957746478875	0.09154929577464788	0.09330985915492962	0.09507042253521125	0.079225352112676	0.079225352112676	0.09154929577464788	0.08274647887323938	0.0880281690140845	0.08274647887323938	0.08626760563380287	0.06866197183098588	0.08450704225352113	0.08978873239436624	0.0880281690140845	0.0880281690140845	0.096830985915493	0.079225352112676	0.08978873239436624	0.07570422535211263	0.09154929577464788	0.09330985915492962	0.051056338028169	0.08978873239436624	0.07042253521126762	0.051056338028169
EPI_ISL_502202	0.09330985915492962	0.1390845070422535	0.08978873239436624	0.09330985915492962	0.10387323943661975	0.08274647887323938	0.09330985915492962	0.096830985915493	0.08098591549295775	0.09154929577464788	0.10739436619718312	0.09154929577464788	0.08098591549295775	0.09154929577464788	0.09154929577464788	0.11443661971830987	0.0880281690140845	0.0651408450704225	0.04225352112676062	0.052816901408450745	0.010563380281690127	0.052816901408450745	0.05457746478873238	0.059859154929577496	0.102112676056338	0.096830985915493	0.10387323943661975	0.08274647887323938	0.0880281690140845	0.102112676056338	0.0880281690140845	0.09330985915492962	0.096830985915493	0.09330985915492962	0.07570422535211263	0.09154929577464788	0.09154929577464788	0.09330985915492962	0.08978873239436624	0.10387323943661975	0.096830985915493	0.09507042253521125	0.08098591549295775	0.096830985915493	0.096830985915493	0.06690140845070425	0.09154929577464788	0.09154929577464788	0.07218309859154926
EPI_ISL_278205	0.08978873239436624	0.1338028169014085	0.0880281690140845	0.0880281690140845	0.102112676056338	0.08098591549295775	0.08626760563380287	0.09154929577464788	0.079225352112676	0.08978873239436624	0.10035211267605637	0.09154929577464788	0.08450704225352113	0.09154929577464788	0.09330985915492962	0.10563380281690138	0.08978873239436624	0.045774647887323994	0.021126760563380254	0.033450704225352124	0.047535211267605626	0.03169014084507038	0.035211267605633756	0.040492957746478875	0.096830985915493	0.09154929577464788	0.10035211267605637	0.08274647887323938	0.08626760563380287	0.096830985915493	0.08274647887323938	0.08626760563380287	0.08978873239436624	0.09330985915492962	0.06690140845070425	0.08978873239436624	0.08978873239436624	0.09154929577464788	0.0880281690140845	0.09507042253521125	0.10035211267605637	0.08978873239436624	0.08274647887323938	0.09507042253521125	0.096830985915493	0.051056338028169	0.09154929577464788	0.09154929577464788	0.052816901408450745
EPI_ISL_135216	0.08274647887323938	0.1109154929577465	0.07042253521126762	0.07218309859154926	0.08098591549295775	0.06690140845070425	0.06690140845070425	0.07746478873239437	0.07042253521126762	0.08098591549295775	0.08274647887323938	0.08274647887323938	0.07042253521126762	0.08626760563380287	0.08626760563380287	0.08450704225352113	0.08098591549295775	0.073943661971831	0.079225352112676	0.06338028169014087	0.09507042253521125	0.08274647887323938	0.07570422535211263	0.06866197183098588	0.07746478873239437	0.07746478873239437	0.08274647887323938	0.06690140845070425	0.06866197183098588	0.079225352112676	0.07218309859154926	0.06690140845070425	0.06866197183098588	0.09507042253521125	0.028169014084507005	0.07042253521126762	0.079225352112676	0.07570422535211263	0.07218309859154926	0.07570422535211263	0.08450704225352113	0.08098591549295775	0.073943661971831	0.08274647887323938	0.08450704225352113	0.07570422535211263	0.08098591549295775	0.08274647887323938	0.08098591549295775
[truncated: 87 more columns]
