# Supplementary material for: Dominant substitutions underlying the antigenic evolution of H5 influenza virus
Source: Research Square preprint supplement (doi:10.21203/rs.3.rs-6040842/v1), 2025-02-26
Supplement: Supplementary file 5 [file 7a59a4f05d0ad5b2615538ec.xlsx]

## Sheet: mutation_common_spec
H5 numbering based on A/Goose/Guangdong/1/96 (H5N1)
Common mutations: Mutations that occur with a frequency of >70% in two or more clades.
Specific mutations: Mutations that occur with a frequency of >70% in one clade while having frequencies of <30% in all other clades.
Antigenic_cluster	key_mutation	key_position	RBD	VE	F'(HA1)	F(HA2)	cleavage	3-loop	RBS	EP_H3	EP_H1
The common mutations shared by AC1(0~9), AC1(2.1*), AC1(2.2*), AC1(2.3.2*), AC1(2.3.4*), AC2(2.3.4.4b), AC2(2.3.4.4*), AC3(2.3.4.4h)	S100N	100		Y						E	Cb
	Q429K	429				Y
	P233S	233	Y					Y
	T124I	124		Y
	N515K	515				Y
	T336S	336			Y
	K499R	499				Y
	M527I	527				Y
The common mutations shared by AC1(0~9), AC1(2.1*), AC1(2.2*), AC1(2.3.2*), AC1(2.3.4*), AC2(2.3.4.4b), AC2(2.3.4.4*)	D142E	142	Y					Y		A
The common mutations shared by AC1(0~9), AC1(2.2*), AC1(2.3.2*), AC1(2.3.4*), AC2(2.3.4.4b), AC2(2.3.4.4*), AC3(2.3.4.4h)	H154Q	154	Y							A	Ca
The common mutations shared by AC1(0~9), AC1(2.2*), AC1(2.3.2*), AC2(2.3.4.4b), AC2(2.3.4.4*), AC3(2.3.4.4h)	A279T	279		Y
The common mutations shared by AC1(0~9), AC1(2.3.2*), AC2(2.3.4.4b), AC2(2.3.4.4*)	S145L	145	Y					Y	Y
The common mutations shared by AC1(0~9), AC1(2.1*), AC1(2.2*), AC1(2.3.4*)	N61D	61		Y							Pa
The common mutations shared by AC1(0~9), AC1(2.1*), AC1(2.3.4*)	A172T	172	Y							B	Sa
The common mutations shared by AC1(0~9), AC1(2.3.2*)	L8F	8
The common mutations shared by AC1(2.1*), AC1(2.2*), AC1(2.3.4*), AC2(2.3.4.4b), AC2(2.3.4.4*), AC3(2.3.4.4h)	E228K	228	Y							D
The common mutations shared by AC1(2.1*), AC1(2.3.4*), AC2(2.3.4.4b), AC2(2.3.4.4*)	S157P	157	Y						Y	A	Ca
The common mutations shared by AC1(2.1*), AC1(2.2*), AC1(2.3*), AC1(2.3.4*)	N140D	140	Y							B	Sa
The common mutations shared by AC1(2.1*), AC1(2.2*), AC1(2.3.2*)	K205R	205	Y					Y		B	Sb
The common mutations shared by AC1(2.2*), AC1(2.3.2*), AC1(2.3.4*), AC2(2.3.4.4*), AC3(2.3.4.4h)	D110N	110		Y
The common mutations shared by AC1(2.2*), AC1(2.3.4*), AC2(2.3.4.4*), AC3(2.3.4.4h)	M298I	298			Y						Pa
The common mutations shared by AC1(2.2*), AC1(2.3.2*), AC1(2.3.4*)	S171N	171	Y							B	Sa
The common mutations shared by AC1(2.3.2*), AC1(2.3.4*), AC2(2.3.4.4b), AC2(2.3.4.4*), AC3(2.3.4.4h)	R326K	326			Y
	E243D	243	Y
The common mutations shared by AC1(2.3.2*), AC2(2.3.4.4b), AC2(2.3.4.4*), AC3(2.3.4.4h)	S149A	149	Y					Y	Y	A
	R69K	69		Y						E
The common mutations shared by AC1(2.3.2*), AC1(2.3.4*), AC2(2.3.4.4b)	L285V	285		Y							Pa
The common mutations shared by AC1(2.3.4*), AC2(2.3.4.4b), AC2(2.3.4.4*), AC3(2.3.4.4h)	P197S	197	Y						Y
	V190I	190	Y
	Q338L	338			Y
The common mutations shared by AC2(2.3.4.4b), AC2(2.3.4.4*), AC3(2.3.4.4h)	F111L	111		Y						D
	Q208K	208	Y					Y		B	Sb
	S171D	171	Y							B	Sa
	N256H	256	Y							D
	K234Q	234	Y					Y			Ca
	A143T	143	Y					Y		A
	K98R	98		Y							Cb
The common mutations shared by AC2(2.3.4.4b), AC2(2.3.4.4*)	S139P	139	Y							B	Sa
	S239R	239	Y					Y		D	Ca
	D199N	199	Y					Y		B	Sb
	K205N	205	Y					Y		B	Sb
	Q131L	131	Y
	N289H	289			Y					C	Pa
	N88R	88		Y
The common mutations shared by AC2(2.3.4.4b), AC3(2.3.4.4h)	A201E	201	Y					Y		B	Sb
The common mutations shared by AC2(2.3.4.4*), AC3(2.3.4.4h)	I130T	130	Y
	I214V	214	Y
	M548I	548				Y
	K344-	344		Y			Y
The specific mutations of AC1(0~9)	A102V	102		Y						E	Cb
	N140S	140	Y							B	Sa
	R156K	156	Y							A	Ca
The specific mutations of AC1(2.1*)	V498I	498				Y
	D504N	504				Y
	H154L	154	Y							A	Ca
The specific mutations of AC1(2.2*)	I87L	87		Y						E	Cb
	A99I	99		Y						E	Cb
	Y268N	268	Y								Cb
	R339G	339			Y
	K489R	489				Y
The specific mutations of AC1(2.3.2*)	S136D	136	Y							A	Sa
	Q18H	18			Y
	R156N	156	Y							A	Ca
	M242I	242	Y					Y		D
	K293R	293			Y					C	Pa
	P152S	152	Y					Y		A	Ca
The specific mutations of AC1(2.3.4*)	K344R	344		Y			Y
	R156T	156	Y							A	Ca
	R342-	342		Y			Y
The specific mutations of AC2(2.3.4.4b)	R341K	341		Y			Y
	K3N	3
	R156A	156	Y							A	Ca
	R178I	178	Y								Sa
	N252D	252	Y							D	Ca
	E284G	284		Y							Pa
	M298V	298			Y						Pa
	V539A	539				Y
The specific mutations of AC2(2.3.4.4*)	L285M	285		Y							Pa
The specific mutations of AC3(2.3.4.4h)	A9S	9
	R156V	156	Y							A	Ca
	K250R	250	Y							D	Ca
	V273I	273	Y							E	Cb
	K275T	275	Y								Cb
	L285I	285		Y							Pa
	N418S	418				Y
	D142-	142	Y					Y		A
